# Supplementary material for: Identification and validation of an endoplasmic-reticulum-stress-related gene signature as an effective diagnostic marker of endometriosis
Source: PeerJ journal article supplement (doi:10.7717/peerj.17070), 2024-03-25

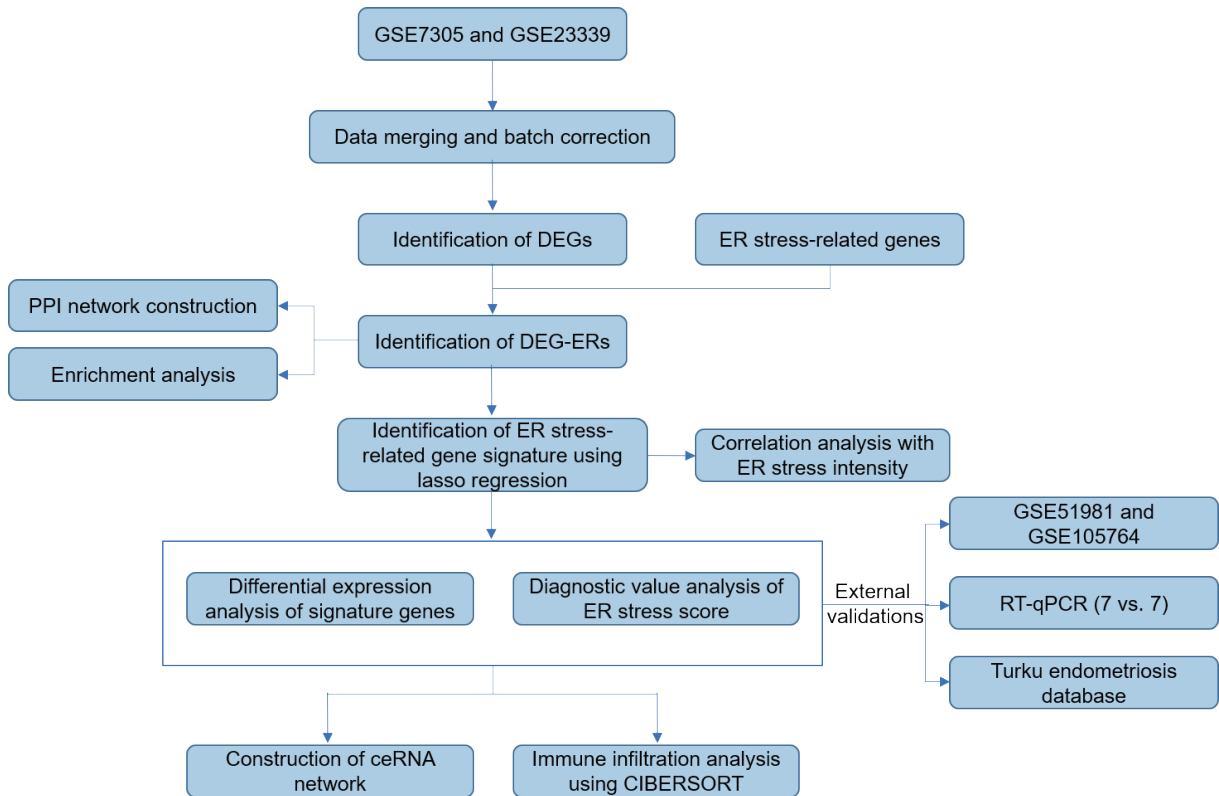

Supplement: Figure_S1.pdf [file Figure_S1.pdf]
