# Supplementary material for: Identification and validation of an endoplasmic-reticulum-stress-related gene signature as an effective diagnostic marker of endometriosis
Source: PeerJ journal article supplement (doi:10.7717/peerj.17070), 2024-03-25
Supplement: Original_data_sheets_used_for_analysis.zip [file Original_data_sheets_used_for_analysis.zip]

## Sheet: GO-BP
	ID	Description	GeneRatio	BgRatio	pvalue	p.adjust	qvalue	geneID	Count
GO:0034976	GO:0034976	response to endoplasmic reticulum stress	11/48	256/18723	3.64165e-11	8.8565e-08	4.75332e-08	ITPR1/AQP11/UBXN8/RNF183/BOK/LRRK2/DNAJC10/XBP1/NUPR1/MAP3K5/CXCL8	11
GO:0070059	GO:0070059	intrinsic apoptotic signaling pathway in response to endoplasmic reticulum stress	7/48	63/18723	2.28872e-10	2.78308e-07	1.49369e-07	ITPR1/RNF183/BOK/LRRK2/DNAJC10/XBP1/MAP3K5	7
GO:0097193	GO:0097193	intrinsic apoptotic signaling pathway	10/48	288/18723	2.47803e-09	2.00885e-06	1.07816e-06	ITPR1/RNF183/BOK/HMOX1/LRRK2/DNAJC10/MUC1/XBP1/NUPR1/MAP3K5	10
GO:0042060	GO:0042060	wound healing	11/48	422/18723	7.14954e-09	4.34692e-06	2.33301e-06	DSP/HMOX1/FN1/XBP1/MAP3K5/HMGCR/COMP/APOE/IGF1/IL6/SERPINA1	11
GO:1904019	GO:1904019	epithelial cell apoptotic process	7/48	121/18723	2.3365e-08	1.13647e-05	6.09949e-06	RYR2/BOK/HMOX1/CCL2/NUPR1/MAP3K5/IL6	7
GO:0019722	GO:0019722	calcium-mediated signaling	8/48	202/18723	4.16538e-08	1.68837e-05	9.06154e-06	ITPR1/VCAM1/RYR2/PLN/LRRK2/DMD/IGF1/CXCL8	8
GO:1905897	GO:1905897	regulation of response to endoplasmic reticulum stress	6/48	82/18723	6.20919e-08	2.15725e-05	1.1578e-05	AQP11/RNF183/BOK/LRRK2/XBP1/NUPR1	6
GO:0019932	GO:0019932	second-messenger-mediated signaling	9/48	312/18723	8.36969e-08	2.54438e-05	1.36558e-05	ITPR1/VCAM1/RYR2/PLN/LRRK2/DMD/APOE/IGF1/CXCL8	9
GO:0051235	GO:0051235	maintenance of location	9/48	327/18723	1.2481e-07	3.11582e-05	1.67227e-05	ITPR1/RYR2/SNCA/APOA1/PLN/DMD/TXN/APOE/IL6	9
GO:0050673	GO:0050673	epithelial cell proliferation	10/48	437/18723	1.28117e-07	3.11582e-05	1.67227e-05	ESR1/AQP11/APOA1/HMOX1/CCL2/XBP1/NUPR1/APOE/IGF1/IL6	10
GO:0050727	GO:0050727	regulation of inflammatory response	9/48	386/18723	5.05186e-07	0.000111692	5.99456e-05	PTGIS/ESR1/SNCA/APOA1/LRRK2/NUPR1/APOE/IGF1/IL6	9
GO:0051651	GO:0051651	maintenance of location in cell	7/48	214/18723	1.14282e-06	0.000231612	0.000124307	ITPR1/RYR2/SNCA/PLN/DMD/TXN/APOE	7
GO:1902235	GO:1902235	regulation of endoplasmic reticulum stress-induced intrinsic apoptotic signaling pathway	4/48	32/18723	1.29685e-06	0.000235695	0.000126499	RNF183/BOK/LRRK2/XBP1	4
GO:1901214	GO:1901214	regulation of neuron death	8/48	319/18723	1.3568e-06	0.000235695	0.000126499	SNCA/BOK/HMOX1/LRRK2/CCL2/NUPR1/MAP3K5/APOE	8
GO:0000302	GO:0000302	response to reactive oxygen species	7/48	222/18723	1.46027e-06	0.000236758	0.000127069	HMOX1/LRRK2/CDK1/TXN/MAP3K5/APOE/IL6	7
GO:0006979	GO:0006979	response to oxidative stress	9/48	446/18723	1.6758e-06	0.000254721	0.00013671	SNCA/HMOX1/LRRK2/MSRB3/CDK1/TXN/MAP3K5/APOE/IL6	9
GO:0003012	GO:0003012	muscle system process	9/48	452/18723	1.87056e-06	0.000256749	0.000137798	RYR2/DSP/PLN/HMOX1/DMD/MAP2K6/COMP/IGF1/DES	9
GO:0042542	GO:0042542	response to hydrogen peroxide	6/48	146/18723	1.90028e-06	0.000256749	0.000137798	HMOX1/LRRK2/CDK1/TXN/MAP3K5/IL6	6
GO:0007568	GO:0007568	aging	8/48	339/18723	2.13517e-06	0.000273302	0.000146682	VCAM1/SNCA/LRRK2/CDK1/MAP2K6/MAP3K5/HMGCR/COMP	8
GO:0010660	GO:0010660	regulation of muscle cell apoptotic process	5/48	84/18723	2.37117e-06	0.000288335	0.00015475	HMOX1/NUPR1/MAP3K5/HMGCR/IGF1	5
GO:0033002	GO:0033002	muscle cell proliferation	7/48	248/18723	3.04629e-06	0.000328994	0.000176572	HMOX1/CDK1/MAP3K5/HMGCR/APOE/IGF1/IL6	7
GO:2001233	GO:2001233	regulation of apoptotic signaling pathway	8/48	356/18723	3.0692e-06	0.000328994	0.000176572	RNF183/BOK/HMOX1/LRRK2/MUC1/XBP1/NUPR1/IGF1	8
GO:0010657	GO:0010657	muscle cell apoptotic process	5/48	89/18723	3.15768e-06	0.000328994	0.000176572	HMOX1/NUPR1/MAP3K5/HMGCR/IGF1	5
GO:0150077	GO:0150077	regulation of neuroinflammatory response	4/48	40/18723	3.24665e-06	0.000328994	0.000176572	LRRK2/NUPR1/IGF1/IL6	4
GO:0070997	GO:0070997	neuron death	8/48	361/18723	3.40252e-06	0.000330998	0.000177648	SNCA/BOK/HMOX1/LRRK2/CCL2/NUPR1/MAP3K5/APOE	8
GO:2001242	GO:2001242	regulation of intrinsic apoptotic signaling pathway	6/48	164/18723	3.73008e-06	0.000344078	0.000184668	RNF183/BOK/LRRK2/MUC1/XBP1/NUPR1	6
GO:0055090	GO:0055090	acylglycerol homeostasis	4/48	42/18723	3.96142e-06	0.000344078	0.000184668	APOA1/XBP1/HMGCR/APOE	4
GO:0070328	GO:0070328	triglyceride homeostasis	4/48	42/18723	3.96142e-06	0.000344078	0.000184668	APOA1/XBP1/HMGCR/APOE	4
GO:0010038	GO:0010038	response to metal ion	8/48	373/18723	4.33034e-06	0.000363151	0.000194905	VCAM1/RYR2/SNCA/PLN/HMOX1/LRRK2/CDK1/NDRG1	8
GO:1904035	GO:1904035	regulation of epithelial cell apoptotic process	5/48	96/18723	4.5881e-06	0.000371942	0.000199623	BOK/HMOX1/CCL2/NUPR1/IL6	5
GO:0150076	GO:0150076	neuroinflammatory response	4/48	44/18723	4.78646e-06	0.000375506	0.000201535	LRRK2/NUPR1/IGF1/IL6	4
GO:0070301	GO:0070301	cellular response to hydrogen peroxide	5/48	98/18723	5.07805e-06	0.000385932	0.000207131	LRRK2/CDK1/TXN/MAP3K5/IL6	5
GO:0014706	GO:0014706	striated muscle tissue development	8/48	384/18723	5.36151e-06	0.000395127	0.000212066	RYR2/DSP/PLN/CDK1/DMD/NUPR1/HMGCR/IGF1	8
GO:0048660	GO:0048660	regulation of smooth muscle cell proliferation	6/48	180/18723	6.37544e-06	0.000456031	0.000244754	HMOX1/MAP3K5/HMGCR/APOE/IGF1/IL6	6
GO:0048661	GO:0048661	positive regulation of smooth muscle cell proliferation	5/48	104/18723	6.79799e-06	0.000472363	0.000253519	HMOX1/MAP3K5/HMGCR/IGF1/IL6	5
GO:0048659	GO:0048659	smooth muscle cell proliferation	6/48	184/18723	7.23165e-06	0.000488538	0.0002622	HMOX1/MAP3K5/HMGCR/APOE/IGF1/IL6	6
GO:0060537	GO:0060537	muscle tissue development	8/48	403/18723	7.63419e-06	0.000501793	0.000269314	RYR2/DSP/PLN/CDK1/DMD/NUPR1/HMGCR/IGF1	8
GO:0034599	GO:0034599	cellular response to oxidative stress	7/48	288/18723	8.12993e-06	0.000520316	0.000279255	SNCA/HMOX1/LRRK2/CDK1/TXN/MAP3K5/IL6	7
GO:0051770	GO:0051770	positive regulation of nitric-oxide synthase biosynthetic process	3/48	16/18723	8.65058e-06	0.000528723	0.000283767	LRRK2/CCL2/MAP2K6	3
GO:0010656	GO:0010656	negative regulation of muscle cell apoptotic process	4/48	51/18723	8.6961e-06	0.000528723	0.000283767	HMOX1/NUPR1/HMGCR/IGF1	4
GO:0002526	GO:0002526	acute inflammatory response	5/48	112/18723	9.76611e-06	0.000579297	0.000310911	VCAM1/FN1/NUPR1/IL6/SERPINA1	5
GO:0051209	GO:0051209	release of sequestered calcium ion into cytosol	5/48	115/18723	1.11088e-05	0.000642647	0.000344911	ITPR1/RYR2/SNCA/PLN/DMD	5
GO:0051283	GO:0051283	negative regulation of sequestering of calcium ion	5/48	116/18723	1.1587e-05	0.000642647	0.000344911	ITPR1/RYR2/SNCA/PLN/DMD	5
GO:0031331	GO:0031331	positive regulation of cellular catabolic process	8/48	427/18723	1.16268e-05	0.000642647	0.000344911	SNCA/APOA1/HMOX1/LRRK2/NUPR1/APOE/IGF1/IL6	8
GO:0150078	GO:0150078	positive regulation of neuroinflammatory response	3/48	18/18723	1.25598e-05	0.00066571	0.000357289	LRRK2/NUPR1/IL6	3
GO:0051282	GO:0051282	regulation of sequestering of calcium ion	5/48	118/18723	1.25915e-05	0.00066571	0.000357289	ITPR1/RYR2/SNCA/PLN/DMD	5
GO:0045785	GO:0045785	positive regulation of cell adhesion	8/48	437/18723	1.37471e-05	0.000711342	0.00038178	VCAM1/APOA1/CCL2/FN1/XBP1/HLA-DRA/IGF1/IL6	8
GO:1901215	GO:1901215	negative regulation of neuron death	6/48	208/18723	1.45475e-05	0.000734765	0.000394351	SNCA/BOK/HMOX1/LRRK2/CCL2/APOE	6
GO:0051208	GO:0051208	sequestering of calcium ion	5/48	122/18723	1.48041e-05	0.000734765	0.000394351	ITPR1/RYR2/SNCA/PLN/DMD	5
GO:0043523	GO:0043523	regulation of neuron apoptotic process	6/48	212/18723	1.62061e-05	0.000784328	0.000420952	SNCA/BOK/HMOX1/CCL2/NUPR1/APOE	6
GO:0006874	GO:0006874	cellular calcium ion homeostasis	8/48	448/18723	1.64477e-05	0.000784328	0.000420952	ITPR1/ESR1/RYR2/SNCA/PLN/BOK/DMD/APOE	8
GO:0051224	GO:0051224	negative regulation of protein transport	5/48	127/18723	1.79838e-05	0.000826618	0.000443649	LRRK2/RSAD2/TXN/HMGCR/APOE	5
GO:0050870	GO:0050870	positive regulation of T cell activation	6/48	216/18723	1.80143e-05	0.000826618	0.000443649	VCAM1/CCL2/XBP1/HLA-DRA/IGF1/IL6	6
GO:0007517	GO:0007517	muscle organ development	7/48	327/18723	1.85081e-05	0.000833552	0.00044737	RYR2/DSP/DMD/XBP1/NUPR1/HMGCR/IGF1	7
GO:0055074	GO:0055074	calcium ion homeostasis	8/48	460/18723	1.98907e-05	0.000868727	0.000466249	ITPR1/ESR1/RYR2/SNCA/PLN/BOK/DMD/APOE	8
GO:0051767	GO:0051767	nitric-oxide synthase biosynthetic process	3/48	21/18723	2.03608e-05	0.000868727	0.000466249	LRRK2/CCL2/MAP2K6	3
GO:0051769	GO:0051769	regulation of nitric-oxide synthase biosynthetic process	3/48	21/18723	2.03608e-05	0.000868727	0.000466249	LRRK2/CCL2/MAP2K6	3
GO:1904950	GO:1904950	negative regulation of establishment of protein localization	5/48	131/18723	2.08912e-05	0.000875991	0.000470147	LRRK2/RSAD2/TXN/HMGCR/APOE	5
GO:0002274	GO:0002274	myeloid leukocyte activation	6/48	223/18723	2.15689e-05	0.000889079	0.000477172	SNCA/HMOX1/LRRK2/NDRG1/IL6/CXCL8	6
GO:2001234	GO:2001234	negative regulation of apoptotic signaling pathway	6/48	224/18723	2.21199e-05	0.000895443	0.000480587	BOK/HMOX1/LRRK2/MUC1/XBP1/IGF1	6
GO:0062197	GO:0062197	cellular response to chemical stress	7/48	337/18723	2.24597e-05	0.000895443	0.000480587	SNCA/HMOX1/LRRK2/CDK1/TXN/MAP3K5/IL6	7
GO:0051051	GO:0051051	negative regulation of transport	8/48	470/18723	2.32059e-05	0.000908457	0.000487572	SNCA/PLN/HMOX1/LRRK2/RSAD2/TXN/HMGCR/APOE	8
GO:0010881	GO:0010881	regulation of cardiac muscle contraction by regulation of the release of sequestered calcium ion	3/48	22/18723	2.35332e-05	0.000908457	0.000487572	RYR2/PLN/DMD	3
GO:0031667	GO:0031667	response to nutrient levels	8/48	474/18723	2.46561e-05	0.000936933	0.000502855	VCAM1/APOA1/HMOX1/LRRK2/XBP1/MAP3K5/HMGCR/APOE	8
GO:0060048	GO:0060048	cardiac muscle contraction	5/48	137/18723	2.59244e-05	0.000969973	0.000520588	RYR2/DSP/PLN/DMD/MAP2K6	5
GO:0043410	GO:0043410	positive regulation of MAPK cascade	8/48	480/18723	2.6974e-05	0.00098312	0.000527644	LRRK2/CCL2/MAP2K6/MAP3K5/HMGCR/APOE/IGF1/IL6	8
GO:0006936	GO:0006936	muscle contraction	7/48	347/18723	2.70843e-05	0.00098312	0.000527644	RYR2/DSP/PLN/DMD/MAP2K6/COMP/DES	7
GO:0072503	GO:0072503	cellular divalent inorganic cation homeostasis	8/48	486/18723	2.94724e-05	0.00105407	0.000565724	ITPR1/ESR1/RYR2/SNCA/PLN/BOK/DMD/APOE	8
GO:0051480	GO:0051480	regulation of cytosolic calcium ion concentration	7/48	353/18723	3.02178e-05	0.00106507	0.000571625	ITPR1/ESR1/RYR2/SNCA/PLN/BOK/DMD	7
GO:0097553	GO:0097553	calcium ion transmembrane import into cytosol	5/48	142/18723	3.07988e-05	0.00107004	0.000574294	ITPR1/RYR2/SNCA/PLN/DMD	5
GO:1903039	GO:1903039	positive regulation of leukocyte cell-cell adhesion	6/48	239/18723	3.18408e-05	0.00107149	0.000575072	VCAM1/CCL2/XBP1/HLA-DRA/IGF1/IL6	6
GO:0070555	GO:0070555	response to interleukin-1	5/48	143/18723	3.18537e-05	0.00107149	0.000575072	PTGIS/SNCA/CCL2/IL6/CXCL8	5
GO:0009896	GO:0009896	positive regulation of catabolic process	8/48	492/18723	3.21623e-05	0.00107149	0.000575072	SNCA/APOA1/HMOX1/LRRK2/NUPR1/APOE/IGF1/IL6	8
GO:0060047	GO:0060047	heart contraction	6/48	241/18723	3.33622e-05	0.00108952	0.00058475	RYR2/DSP/PLN/DMD/MAP2K6/DES	6
GO:0071900	GO:0071900	regulation of protein serine/threonine kinase activity	7/48	359/18723	3.36444e-05	0.00108952	0.00058475	SNCA/LRRK2/MAP2K6/MAP3K5/HMGCR/APOE/CDKN3	7
GO:0043524	GO:0043524	negative regulation of neuron apoptotic process	5/48	145/18723	3.40476e-05	0.00108952	0.00058475	SNCA/BOK/HMOX1/CCL2/APOE	5
GO:1903531	GO:1903531	negative regulation of secretion by cell	5/48	147/18723	3.63569e-05	0.00114831	0.000616303	SNCA/HMOX1/RSAD2/HMGCR/APOE	5
GO:0051402	GO:0051402	neuron apoptotic process	6/48	246/18723	3.74227e-05	0.00116682	0.000626238	SNCA/BOK/HMOX1/CCL2/NUPR1/APOE	6
GO:0003015	GO:0003015	heart process	6/48	251/18723	4.18715e-05	0.00127897	0.00068643	RYR2/DSP/PLN/DMD/MAP2K6/DES	6
GO:0045862	GO:0045862	positive regulation of proteolysis	7/48	372/18723	4.21757e-05	0.00127897	0.00068643	SNCA/BOK/LRRK2/FN1/NUPR1/MAP3K5/APOE	7
GO:0031100	GO:0031100	animal organ regeneration	4/48	76/18723	4.25974e-05	0.00127897	0.00068643	APOA1/HMOX1/CDK1/IL6	4
GO:0010882	GO:0010882	regulation of cardiac muscle contraction by calcium ion signaling	3/48	27/18723	4.4297e-05	0.00131378	0.000705113	RYR2/PLN/DMD	3
GO:0055117	GO:0055117	regulation of cardiac muscle contraction	4/48	77/18723	4.48472e-05	0.00131408	0.00070527	RYR2/DSP/PLN/DMD	4
GO:1903522	GO:1903522	regulation of blood circulation	6/48	256/18723	4.67353e-05	0.00134002	0.000719196	RYR2/DSP/PLN/DMD/HMGCR/DES	6
GO:0034614	GO:0034614	cellular response to reactive oxygen species	5/48	155/18723	4.68347e-05	0.00134002	0.000719196	LRRK2/CDK1/TXN/MAP3K5/IL6	5
GO:0050678	GO:0050678	regulation of epithelial cell proliferation	7/48	381/18723	4.90663e-05	0.00138669	0.000744239	AQP11/HMOX1/CCL2/XBP1/NUPR1/APOE/IGF1	7
GO:0051279	GO:0051279	regulation of release of sequestered calcium ion into cytosol	4/48	79/18723	4.9606e-05	0.00138669	0.000744239	RYR2/SNCA/PLN/DMD	4
GO:0048145	GO:0048145	regulation of fibroblast proliferation	4/48	80/18723	5.21189e-05	0.00143221	0.000768674	ESR1/FN1/NUPR1/IGF1	4
GO:0042326	GO:0042326	negative regulation of phosphorylation	7/48	385/18723	5.24124e-05	0.00143221	0.000768674	SNCA/LRRK2/DMD/DNAJC10/NUPR1/HMGCR/APOE	7
GO:0060402	GO:0060402	calcium ion transport into cytosol	5/48	160/18723	5.44814e-05	0.0014625	0.00078493	ITPR1/RYR2/SNCA/PLN/DMD	5
GO:0048144	GO:0048144	fibroblast proliferation	4/48	81/18723	5.47235e-05	0.0014625	0.00078493	ESR1/FN1/NUPR1/IGF1	4
GO:0072331	GO:0072331	signal transduction by p53 class mediator	5/48	163/18723	5.95118e-05	0.00157318	0.000844332	BOK/MAP2K6/MUC1/NUPR1/NDRG1	5
GO:0010880	GO:0010880	regulation of release of sequestered calcium ion into cytosol by sarcoplasmic reticulum	3/48	30/18723	6.11545e-05	0.00158509	0.000850726	RYR2/PLN/DMD	3
GO:0002700	GO:0002700	regulation of production of molecular mediator of immune response	5/48	164/18723	6.1266e-05	0.00158509	0.000850726	APOA1/HMOX1/RSAD2/XBP1/IL6	5
GO:0010507	GO:0010507	negative regulation of autophagy	4/48	85/18723	6.61008e-05	0.00169218	0.0009082	SNCA/HMOX1/LRRK2/NUPR1	4
GO:0051048	GO:0051048	negative regulation of secretion	5/48	171/18723	7.46913e-05	0.00189218	0.00101554	SNCA/HMOX1/RSAD2/HMGCR/APOE	5
GO:0002696	GO:0002696	positive regulation of leukocyte activation	7/48	409/18723	7.66601e-05	0.00192203	0.00103156	VCAM1/LRRK2/CCL2/XBP1/HLA-DRA/IGF1/IL6	7
GO:0007584	GO:0007584	response to nutrient	5/48	174/18723	8.10941e-05	0.00201246	0.00108009	VCAM1/APOA1/HMOX1/XBP1/HMGCR	5
GO:0034109	GO:0034109	homotypic cell-cell adhesion	4/48	90/18723	8.26373e-05	0.00201924	0.00108373	DSP/FN1/COMP/IL6	4
GO:0022409	GO:0022409	positive regulation of cell-cell adhesion	6/48	284/18723	8.30279e-05	0.00201924	0.00108373	VCAM1/CCL2/XBP1/HLA-DRA/IGF1/IL6	6
GO:0014808	GO:0014808	release of sequestered calcium ion into cytosol by sarcoplasmic reticulum	3/48	34/18723	8.94882e-05	0.00211297	0.00113404	RYR2/PLN/DMD	3
GO:0016242	GO:0016242	negative regulation of macroautophagy	3/48	34/18723	8.94882e-05	0.00211297	0.00113404	HMOX1/LRRK2/NUPR1	3
GO:0086004	GO:0086004	regulation of cardiac muscle cell contraction	3/48	34/18723	8.94882e-05	0.00211297	0.00113404	RYR2/DSP/PLN	3
GO:0050867	GO:0050867	positive regulation of cell activation	7/48	420/18723	9.04947e-05	0.00211618	0.00113576	VCAM1/LRRK2/CCL2/XBP1/HLA-DRA/IGF1/IL6	7
GO:0006941	GO:0006941	striated muscle contraction	5/48	179/18723	9.26968e-05	0.00214704	0.00115232	RYR2/DSP/PLN/DMD/MAP2K6	5
GO:1903514	GO:1903514	release of sequestered calcium ion into cytosol by endoplasmic reticulum	3/48	35/18723	9.77017e-05	0.00222066	0.00119184	RYR2/PLN/DMD	3
GO:1905898	GO:1905898	positive regulation of response to endoplasmic reticulum stress	3/48	35/18723	9.77017e-05	0.00222066	0.00119184	RNF183/BOK/XBP1	3
GO:0060401	GO:0060401	cytosolic calcium ion transport	5/48	182/18723	0.000100247	0.00225742	0.00121156	ITPR1/RYR2/SNCA/PLN/DMD	5
GO:0006942	GO:0006942	regulation of striated muscle contraction	4/48	95/18723	0.000101998	0.00227576	0.00122141	RYR2/DSP/PLN/DMD	4
GO:0002718	GO:0002718	regulation of cytokine production involved in immune response	4/48	96/18723	0.000106233	0.00231023	0.00123991	APOA1/HMOX1/RSAD2/IL6	4
GO:0042632	GO:0042632	cholesterol homeostasis	4/48	96/18723	0.000106233	0.00231023	0.00123991	APOA1/XBP1/HMGCR/APOE	4
GO:0051354	GO:0051354	negative regulation of oxidoreductase activity	3/48	36/18723	0.000106392	0.00231023	0.00123991	SNCA/LRRK2/GLA	3
GO:0055092	GO:0055092	sterol homeostasis	4/48	97/18723	0.000110594	0.00236777	0.00127079	APOA1/XBP1/HMGCR/APOE	4
GO:0042391	GO:0042391	regulation of membrane potential	7/48	434/18723	0.000110989	0.00236777	0.00127079	RYR2/SNCA/DSP/PLN/BOK/LRRK2/DMD	7
GO:0002367	GO:0002367	cytokine production involved in immune response	4/48	98/18723	0.000115084	0.00243378	0.00130622	APOA1/HMOX1/RSAD2/IL6	4
GO:0008630	GO:0008630	intrinsic apoptotic signaling pathway in response to DNA damage	4/48	99/18723	0.000119705	0.00250968	0.00134696	BOK/HMOX1/MUC1/NUPR1	4
GO:0045936	GO:0045936	negative regulation of phosphate metabolic process	7/48	441/18723	0.000122572	0.00254782	0.00136742	SNCA/LRRK2/DMD/DNAJC10/NUPR1/HMGCR/APOE	7
GO:0010563	GO:0010563	negative regulation of phosphorus metabolic process	7/48	442/18723	0.000124304	0.00256193	0.001375	SNCA/LRRK2/DMD/DNAJC10/NUPR1/HMGCR/APOE	7
GO:0001666	GO:0001666	response to hypoxia	6/48	307/18723	0.000127243	0.00260046	0.00139568	PTGIS/ITPR1/VCAM1/RYR2/HMOX1/NDRG1	6
GO:0002440	GO:0002440	production of molecular mediator of immune response	6/48	308/18723	0.000129521	0.00262496	0.00140883	APOA1/HMOX1/RSAD2/XBP1/HLA-DRA/IL6	6
GO:0010522	GO:0010522	regulation of calcium ion transport into cytosol	4/48	102/18723	0.000134376	0.00267808	0.00143733	RYR2/SNCA/PLN/DMD	4
GO:0022407	GO:0022407	regulation of cell-cell adhesion	7/48	448/18723	0.000135122	0.00267808	0.00143733	VCAM1/APOA1/CCL2/XBP1/HLA-DRA/IGF1/IL6	7
GO:1903115	GO:1903115	regulation of actin filament-based movement	3/48	39/18723	0.000135446	0.00267808	0.00143733	RYR2/DSP/PLN	3
GO:0002027	GO:0002027	regulation of heart rate	4/48	103/18723	0.000139543	0.00273685	0.00146888	RYR2/DSP/PLN/DMD	4
GO:0018105	GO:0018105	peptidyl-serine phosphorylation	6/48	315/18723	0.000146392	0.0028482	0.00152864	SNCA/LRRK2/CDK1/DMD/TXN/IL6	6
GO:0031099	GO:0031099	regeneration	5/48	198/18723	0.000148838	0.00287281	0.00154185	APOA1/HMOX1/CDK1/IGF1/IL6	5
GO:0010506	GO:0010506	regulation of autophagy	6/48	317/18723	0.000151519	0.00287886	0.00154509	ITPR1/SNCA/BOK/HMOX1/LRRK2/NUPR1	6
GO:0019058	GO:0019058	viral life cycle	6/48	317/18723	0.000151519	0.00287886	0.00154509	CCL2/CDK1/RSAD2/MX1/APOE/CXCL8	6
GO:0007204	GO:0007204	positive regulation of cytosolic calcium ion concentration	6/48	319/18723	0.000156788	0.00294497	0.00158058	ITPR1/ESR1/RYR2/SNCA/PLN/DMD	6
GO:0070296	GO:0070296	sarcoplasmic reticulum calcium ion transport	3/48	41/18723	0.00015742	0.00294497	0.00158058	RYR2/PLN/DMD	3
GO:0009895	GO:0009895	negative regulation of catabolic process	6/48	320/18723	0.000159476	0.00296065	0.00158899	SNCA/AQP11/HMOX1/LRRK2/NUPR1/HMGCR	6
GO:0051341	GO:0051341	regulation of oxidoreductase activity	4/48	107/18723	0.000161661	0.00297848	0.00159856	SNCA/LRRK2/APOE/GLA	4
GO:0036293	GO:0036293	response to decreased oxygen levels	6/48	322/18723	0.000164962	0.00301645	0.00161894	PTGIS/ITPR1/VCAM1/RYR2/HMOX1/NDRG1	6
GO:0008016	GO:0008016	regulation of heart contraction	5/48	206/18723	0.000179039	0.00324942	0.00174398	RYR2/DSP/PLN/DMD/DES	5
GO:0050863	GO:0050863	regulation of T cell activation	6/48	329/18723	0.000185354	0.00333911	0.00179211	VCAM1/CCL2/XBP1/HLA-DRA/IGF1/IL6	6
GO:0070371	GO:0070371	ERK1 and ERK2 cascade	6/48	330/18723	0.000188423	0.00336944	0.00180839	CCL2/CDK1/FN1/HMGCR/APOE/IGF1	6
GO:1903573	GO:1903573	negative regulation of response to endoplasmic reticulum stress	3/48	44/18723	0.000194526	0.0034532	0.00185334	AQP11/LRRK2/XBP1	3
GO:0071347	GO:0071347	cellular response to interleukin-1	4/48	113/18723	0.000199443	0.00351482	0.00188642	PTGIS/CCL2/IL6/CXCL8	4
GO:1903037	GO:1903037	regulation of leukocyte cell-cell adhesion	6/48	336/18723	0.000207692	0.00363386	0.00195031	VCAM1/CCL2/XBP1/HLA-DRA/IGF1/IL6	6
GO:0018209	GO:0018209	peptidyl-serine modification	6/48	338/18723	0.00021445	0.00372531	0.00199938	SNCA/LRRK2/CDK1/DMD/TXN/IL6	6
GO:0002697	GO:0002697	regulation of immune effector process	6/48	339/18723	0.000217894	0.00375828	0.00201708	APOA1/HMOX1/RSAD2/XBP1/HLA-DRA/IL6	6
GO:0042110	GO:0042110	T cell activation	7/48	487/18723	0.000225646	0.0038589	0.00207109	VCAM1/CCL2/RSAD2/XBP1/HLA-DRA/IGF1/IL6	7
GO:0007596	GO:0007596	blood coagulation	5/48	217/18723	0.000227962	0.0038589	0.00207109	FN1/COMP/APOE/IL6/SERPINA1	5
GO:0001933	GO:0001933	negative regulation of protein phosphorylation	6/48	342/18723	0.000228488	0.0038589	0.00207109	SNCA/LRRK2/DMD/DNAJC10/HMGCR/APOE	6
GO:0032496	GO:0032496	response to lipopolysaccharide	6/48	343/18723	0.000232108	0.00389301	0.00208939	VCAM1/SNCA/CCL2/XBP1/IL6/CXCL8	6
GO:0001774	GO:0001774	microglial cell activation	3/48	47/18723	0.000236883	0.0039351	0.00211198	SNCA/LRRK2/IL6	3
GO:0034764	GO:0034764	positive regulation of transmembrane transport	5/48	219/18723	0.000237854	0.0039351	0.00211198	RYR2/SNCA/CCL2/DMD/IGF1	5
GO:0070482	GO:0070482	response to oxygen levels	6/48	347/18723	0.000247045	0.00405955	0.00217877	PTGIS/ITPR1/VCAM1/RYR2/HMOX1/NDRG1	6
GO:0048146	GO:0048146	positive regulation of fibroblast proliferation	3/48	48/18723	0.000252221	0.00407965	0.00218956	ESR1/FN1/IGF1	3
GO:0007599	GO:0007599	hemostasis	5/48	222/18723	0.000253301	0.00407965	0.00218956	FN1/COMP/APOE/IL6/SERPINA1	5
GO:0050817	GO:0050817	coagulation	5/48	222/18723	0.000253301	0.00407965	0.00218956	FN1/COMP/APOE/IL6/SERPINA1	5
GO:0006953	GO:0006953	acute-phase response	3/48	49/18723	0.000268187	0.004291	0.00230299	FN1/IL6/SERPINA1	3
GO:0030168	GO:0030168	platelet activation	4/48	123/18723	0.000275993	0.00438703	0.00235453	FN1/COMP/APOE/IL6	4
GO:0010665	GO:0010665	regulation of cardiac muscle cell apoptotic process	3/48	50/18723	0.000284793	0.00445626	0.00239169	NUPR1/MAP3K5/HMGCR	3
GO:1902237	GO:1902237	positive regulation of endoplasmic reticulum stress-induced intrinsic apoptotic signaling pathway	2/48	10/18723	0.000285845	0.00445626	0.00239169	RNF183/BOK	2
GO:2000169	GO:2000169	regulation of peptidyl-cysteine S-nitrosylation	2/48	10/18723	0.000285845	0.00445626	0.00239169	DMD/TXN	2
GO:0071356	GO:0071356	cellular response to tumor necrosis factor	5/48	229/18723	0.000292311	0.00452803	0.00243021	VCAM1/APOA1/CCL2/MAP3K5/CXCL8	5
GO:0009306	GO:0009306	protein secretion	6/48	359/18723	0.000296453	0.00456313	0.00244905	RSAD2/HMGCR/COMP/APOE/IGF1/IL6	6
GO:0035592	GO:0035592	establishment of protein localization to extracellular region	6/48	360/18723	0.000300897	0.00460241	0.00247013	RSAD2/HMGCR/COMP/APOE/IGF1/IL6	6
GO:0051251	GO:0051251	positive regulation of lymphocyte activation	6/48	362/18723	0.000309943	0.00471114	0.00252848	VCAM1/CCL2/XBP1/HLA-DRA/IGF1/IL6	6
GO:0002237	GO:0002237	response to molecule of bacterial origin	6/48	363/18723	0.000314545	0.00472207	0.00253435	VCAM1/SNCA/CCL2/XBP1/IL6/CXCL8	6
GO:0051098	GO:0051098	regulation of binding	6/48	363/18723	0.000314545	0.00472207	0.00253435	PLN/HMOX1/LRRK2/TXN/APOE/IGF1	6
GO:0010662	GO:0010662	regulation of striated muscle cell apoptotic process	3/48	52/18723	0.000319966	0.00477398	0.00256221	NUPR1/MAP3K5/HMGCR	3
GO:0002699	GO:0002699	positive regulation of immune effector process	5/48	235/18723	0.000329245	0.00488246	0.00262043	HMOX1/RSAD2/XBP1/HLA-DRA/IL6	5
GO:0048738	GO:0048738	cardiac muscle tissue development	5/48	236/18723	0.000335729	0.00493034	0.00264613	RYR2/DSP/PLN/CDK1/IGF1	5
GO:0071692	GO:0071692	protein localization to extracellular region	6/48	368/18723	0.00033837	0.00493034	0.00264613	RSAD2/HMGCR/COMP/APOE/IGF1/IL6	6
GO:0034381	GO:0034381	plasma lipoprotein particle clearance	3/48	53/18723	0.000338555	0.00493034	0.00264613	APOA1/HMOX1/APOE	3
GO:0043467	GO:0043467	regulation of generation of precursor metabolites and energy	4/48	130/18723	0.000340814	0.00493368	0.00264793	SNCA/CDK1/NUPR1/IGF1	4
GO:0097050	GO:0097050	type B pancreatic cell apoptotic process	2/48	11/18723	0.000348795	0.00501935	0.0026939	RYR2/IL6	2
GO:0019079	GO:0019079	viral genome replication	4/48	131/18723	0.00035089	0.00501979	0.00269414	CCL2/RSAD2/MX1/CXCL8	4
GO:0007159	GO:0007159	leukocyte cell-cell adhesion	6/48	371/18723	0.000353332	0.00502516	0.00269702	VCAM1/CCL2/XBP1/HLA-DRA/IGF1/IL6	6
GO:0010659	GO:0010659	cardiac muscle cell apoptotic process	3/48	54/18723	0.000357827	0.0050595	0.00271545	NUPR1/MAP3K5/HMGCR	3
GO:0050878	GO:0050878	regulation of body fluid levels	6/48	379/18723	0.000395779	0.00548952	0.00294625	FN1/XBP1/COMP/APOE/IL6/SERPINA1	6
GO:0051346	GO:0051346	negative regulation of hydrolase activity	6/48	379/18723	0.000395779	0.00548952	0.00294625	SNCA/APOA1/PLN/COL7A1/LRRK2/SERPINA1	6
GO:0002711	GO:0002711	positive regulation of T cell mediated immunity	3/48	56/18723	0.000398459	0.00548952	0.00294625	RSAD2/HLA-DRA/IL6	3
GO:0010658	GO:0010658	striated muscle cell apoptotic process	3/48	56/18723	0.000398459	0.00548952	0.00294625	NUPR1/MAP3K5/HMGCR	3
GO:0031668	GO:0031668	cellular response to extracellular stimulus	5/48	246/18723	0.000406036	0.00548952	0.00294625	VCAM1/HMOX1/LRRK2/XBP1/MAP3K5	5
GO:0034370	GO:0034370	triglyceride-rich lipoprotein particle remodeling	2/48	12/18723	0.00041787	0.00548952	0.00294625	APOA1/APOE	2
GO:0034372	GO:0034372	very-low-density lipoprotein particle remodeling	2/48	12/18723	0.00041787	0.00548952	0.00294625	APOA1/APOE	2
GO:0071872	GO:0071872	cellular response to epinephrine stimulus	2/48	12/18723	0.00041787	0.00548952	0.00294625	RYR2/SNCA	2
GO:0098911	GO:0098911	regulation of ventricular cardiac muscle cell action potential	2/48	12/18723	0.00041787	0.00548952	0.00294625	RYR2/DSP	2
GO:1901894	GO:1901894	regulation of ATPase-coupled calcium transmembrane transporter activity	2/48	12/18723	0.00041787	0.00548952	0.00294625	RYR2/PLN	2
GO:0006695	GO:0006695	cholesterol biosynthetic process	3/48	57/18723	0.00041984	0.00548952	0.00294625	APOA1/HMGCR/APOE	3
GO:0050879	GO:0050879	multicellular organismal movement	3/48	57/18723	0.00041984	0.00548952	0.00294625	ITPR1/DMD/COMP	3
GO:0050881	GO:0050881	musculoskeletal movement	3/48	57/18723	0.00041984	0.00548952	0.00294625	ITPR1/DMD/COMP	3
GO:1902653	GO:1902653	secondary alcohol biosynthetic process	3/48	57/18723	0.00041984	0.00548952	0.00294625	APOA1/HMGCR/APOE	3
GO:0045860	GO:0045860	positive regulation of protein kinase activity	6/48	386/18723	0.000436112	0.00567179	0.00304407	SNCA/LRRK2/TXN/MAP2K6/MAP3K5/IGF1	6
GO:0032387	GO:0032387	negative regulation of intracellular transport	3/48	58/18723	0.000441946	0.00568684	0.00305214	PLN/LRRK2/TXN	3
GO:2001244	GO:2001244	positive regulation of intrinsic apoptotic signaling pathway	3/48	58/18723	0.000441946	0.00568684	0.00305214	RNF183/BOK/NUPR1	3
GO:0046165	GO:0046165	alcohol biosynthetic process	4/48	140/18723	0.000451417	0.00577125	0.00309745	SNCA/APOA1/HMGCR/APOE	4
GO:0090257	GO:0090257	regulation of muscle system process	5/48	252/18723	0.000453252	0.00577125	0.00309745	RYR2/DSP/PLN/DMD/IGF1	5
GO:0034612	GO:0034612	response to tumor necrosis factor	5/48	253/18723	0.000461508	0.00584577	0.00313744	VCAM1/APOA1/CCL2/MAP3K5/CXCL8	5
GO:0032768	GO:0032768	regulation of monooxygenase activity	3/48	59/18723	0.000464786	0.00585235	0.00314098	SNCA/APOE/GLA	3
GO:0042176	GO:0042176	regulation of protein catabolic process	6/48	391/18723	0.00046684	0.00585235	0.00314098	SNCA/AQP11/LRRK2/NUPR1/HMGCR/APOE	6
GO:0050729	GO:0050729	positive regulation of inflammatory response	4/48	142/18723	0.000476277	0.00593557	0.00318564	SNCA/LRRK2/NUPR1/IL6	4
GO:0051924	GO:0051924	regulation of calcium ion transport	5/48	255/18723	0.00047836	0.00593557	0.00318564	RYR2/SNCA/PLN/CCL2/DMD	5
GO:0033700	GO:0033700	phospholipid efflux	2/48	13/18723	0.000493038	0.00599534	0.00321772	APOA1/APOE	2
GO:0035745	GO:0035745	T-helper 2 cell cytokine production	2/48	13/18723	0.000493038	0.00599534	0.00321772	RSAD2/IL6	2
GO:1900103	GO:1900103	positive regulation of endoplasmic reticulum unfolded protein response	2/48	13/18723	0.000493038	0.00599534	0.00321772	BOK/XBP1	2
GO:2000551	GO:2000551	regulation of T-helper 2 cell cytokine production	2/48	13/18723	0.000493038	0.00599534	0.00321772	RSAD2/IL6	2
GO:0033135	GO:0033135	regulation of peptidyl-serine phosphorylation	4/48	144/18723	0.000502098	0.00607514	0.00326055	SNCA/DMD/TXN/IL6	4
GO:0034113	GO:0034113	heterotypic cell-cell adhesion	3/48	61/18723	0.000512708	0.0061424	0.00329665	VCAM1/APOA1/DSP	3
GO:0043030	GO:0043030	regulation of macrophage activation	3/48	61/18723	0.000512708	0.0061424	0.00329665	SNCA/LRRK2/IL6	3
GO:0031330	GO:0031330	negative regulation of cellular catabolic process	5/48	262/18723	0.000541021	0.00644982	0.00346164	SNCA/AQP11/HMOX1/LRRK2/NUPR1	5
GO:0010872	GO:0010872	regulation of cholesterol esterification	2/48	14/18723	0.000574271	0.00671455	0.00360372	APOA1/APOE	2
GO:0035641	GO:0035641	locomotory exploration behavior	2/48	14/18723	0.000574271	0.00671455	0.00360372	LRRK2/APOE	2
GO:0060354	GO:0060354	negative regulation of cell adhesion molecule production	2/48	14/18723	0.000574271	0.00671455	0.00360372	APOA1/CXCL8	2
GO:2001140	GO:2001140	positive regulation of phospholipid transport	2/48	14/18723	0.000574271	0.00671455	0.00360372	APOA1/APOE	2
GO:0016126	GO:0016126	sterol biosynthetic process	3/48	64/18723	0.00059035	0.00686953	0.0036869	APOA1/HMGCR/APOE	3
GO:0050708	GO:0050708	regulation of protein secretion	5/48	268/18723	0.000599489	0.00691972	0.00371384	RSAD2/HMGCR/APOE/IGF1/IL6	5
GO:1904064	GO:1904064	positive regulation of cation transmembrane transport	4/48	151/18723	0.000600354	0.00691972	0.00371384	RYR2/SNCA/CCL2/DMD	4
GO:0016032	GO:0016032	viral process	6/48	415/18723	0.00063868	0.00731299	0.00392491	CCL2/CDK1/RSAD2/MX1/APOE/CXCL8	6
GO:0032488	GO:0032488	Cdc42 protein signal transduction	2/48	15/18723	0.000661537	0.00731299	0.00392491	APOA1/APOE	2
GO:0034380	GO:0034380	high-density lipoprotein particle assembly	2/48	15/18723	0.000661537	0.00731299	0.00392491	APOA1/APOE	2
GO:0034384	GO:0034384	high-density lipoprotein particle clearance	2/48	15/18723	0.000661537	0.00731299	0.00392491	APOA1/APOE	2
GO:0060628	GO:0060628	regulation of ER to Golgi vesicle-mediated transport	2/48	15/18723	0.000661537	0.00731299	0.00392491	STX18/LRRK2	2
GO:0071871	GO:0071871	response to epinephrine	2/48	15/18723	0.000661537	0.00731299	0.00392491	RYR2/SNCA	2
GO:1902902	GO:1902902	negative regulation of autophagosome assembly	2/48	15/18723	0.000661537	0.00731299	0.00392491	LRRK2/NUPR1	2
GO:1903799	GO:1903799	negative regulation of production of miRNAs involved in gene silencing by miRNA	2/48	15/18723	0.000661537	0.00731299	0.00392491	ESR1/IL6	2
GO:2001138	GO:2001138	regulation of phospholipid transport	2/48	15/18723	0.000661537	0.00731299	0.00392491	APOA1/APOE	2
GO:0043270	GO:0043270	positive regulation of ion transport	5/48	275/18723	0.00067357	0.00739606	0.00396949	RYR2/SNCA/CCL2/DMD/MAP2K6	5
GO:0070527	GO:0070527	platelet aggregation	3/48	67/18723	0.000675134	0.00739606	0.00396949	FN1/COMP/IL6	3
GO:0032102	GO:0032102	negative regulation of response to external stimulus	6/48	420/18723	0.000679978	0.00741573	0.00398005	PTGIS/APOA1/CCL2/HMGCR/APOE/IGF1	6
GO:0006816	GO:0006816	calcium ion transport	6/48	422/18723	0.000697067	0.00756815	0.00406185	ITPR1/RYR2/SNCA/PLN/CCL2/DMD	6
GO:0022898	GO:0022898	regulation of transmembrane transporter activity	5/48	278/18723	0.00070734	0.00764555	0.0041034	RYR2/SNCA/PLN/CCL2/DMD	5
GO:1903169	GO:1903169	regulation of calcium ion transmembrane transport	4/48	159/18723	0.000728563	0.00784011	0.00420781	RYR2/SNCA/PLN/DMD	4
GO:0002830	GO:0002830	positive regulation of type 2 immune response	2/48	16/18723	0.000754806	0.0079467	0.00426502	RSAD2/IL6	2
GO:0017014	GO:0017014	protein nitrosylation	2/48	16/18723	0.000754806	0.0079467	0.00426502	DMD/TXN	2
GO:0018119	GO:0018119	peptidyl-cysteine S-nitrosylation	2/48	16/18723	0.000754806	0.0079467	0.00426502	DMD/TXN	2
GO:0034375	GO:0034375	high-density lipoprotein particle remodeling	2/48	16/18723	0.000754806	0.0079467	0.00426502	APOA1/APOE	2
GO:0055089	GO:0055089	fatty acid homeostasis	2/48	16/18723	0.000754806	0.0079467	0.00426502	XBP1/APOE	2
GO:0050680	GO:0050680	negative regulation of epithelial cell proliferation	4/48	164/18723	0.000817895	0.0085738	0.00460159	AQP11/CCL2/NUPR1/APOE	4
GO:0050709	GO:0050709	negative regulation of protein secretion	3/48	72/18723	0.000833008	0.00869474	0.0046665	RSAD2/HMGCR/APOE	3
GO:0050848	GO:0050848	regulation of calcium-mediated signaling	3/48	73/18723	0.000867151	0.00897409	0.00481643	ITPR1/LRRK2/IGF1	3
GO:0086003	GO:0086003	cardiac muscle cell contraction	3/48	73/18723	0.000867151	0.00897409	0.00481643	RYR2/DSP/PLN	3
GO:0034767	GO:0034767	positive regulation of ion transmembrane transport	4/48	167/18723	0.000875065	0.00897957	0.00481937	RYR2/SNCA/CCL2/DMD	4
GO:0055088	GO:0055088	lipid homeostasis	4/48	167/18723	0.000875065	0.00897957	0.00481937	APOA1/XBP1/HMGCR/APOE	4
GO:0006937	GO:0006937	regulation of muscle contraction	4/48	169/18723	0.000914711	0.00934696	0.00501655	RYR2/DSP/PLN/DMD	4
GO:0043627	GO:0043627	response to estrogen	3/48	75/18723	0.000938076	0.00948317	0.00508965	ESR1/APOA1/HMOX1	3
GO:0010663	GO:0010663	positive regulation of striated muscle cell apoptotic process	2/48	18/18723	0.000959235	0.00948317	0.00508965	MAP3K5/HMGCR	2
GO:0010666	GO:0010666	positive regulation of cardiac muscle cell apoptotic process	2/48	18/18723	0.000959235	0.00948317	0.00508965	MAP3K5/HMGCR	2
GO:0032769	GO:0032769	negative regulation of monooxygenase activity	2/48	18/18723	0.000959235	0.00948317	0.00508965	SNCA/GLA	2
GO:0034433	GO:0034433	steroid esterification	2/48	18/18723	0.000959235	0.00948317	0.00508965	APOA1/APOE	2
GO:0034434	GO:0034434	sterol esterification	2/48	18/18723	0.000959235	0.00948317	0.00508965	APOA1/APOE	2
GO:0034435	GO:0034435	cholesterol esterification	2/48	18/18723	0.000959235	0.00948317	0.00508965	APOA1/APOE	2
GO:0035743	GO:0035743	CD4-positive, alpha-beta T cell cytokine production	2/48	18/18723	0.000959235	0.00948317	0.00508965	RSAD2/IL6	2
GO:0014823	GO:0014823	response to activity	3/48	76/18723	0.000974877	0.00952169	0.00511033	RYR2/CDK1/IL6	3
GO:0072332	GO:0072332	intrinsic apoptotic signaling pathway by p53 class mediator	3/48	76/18723	0.000974877	0.00952169	0.00511033	BOK/MUC1/NUPR1	3
GO:0086001	GO:0086001	cardiac muscle cell action potential	3/48	76/18723	0.000974877	0.00952169	0.00511033	RYR2/DSP/DMD	3
GO:0051099	GO:0051099	positive regulation of binding	4/48	173/18723	0.000997778	0.00970638	0.00520945	LRRK2/TXN/APOE/IGF1	4
GO:0042063	GO:0042063	gliogenesis	5/48	301/18723	0.00101013	0.00978736	0.00525291	BOK/CCL2/CDK1/NDRG1/IL6	5
GO:0050728	GO:0050728	negative regulation of inflammatory response	4/48	176/18723	0.00106347	0.0101286	0.00543606	PTGIS/APOA1/APOE/IGF1	4
GO:0045019	GO:0045019	negative regulation of nitric oxide biosynthetic process	2/48	19/18723	0.00107033	0.0101286	0.00543606	PTGIS/GLA	2
GO:0062099	GO:0062099	negative regulation of programmed necrotic cell death	2/48	19/18723	0.00107033	0.0101286	0.00543606	BOK/NUPR1	2
GO:1900221	GO:1900221	regulation of amyloid-beta clearance	2/48	19/18723	0.00107033	0.0101286	0.00543606	HMGCR/APOE	2
GO:1903978	GO:1903978	regulation of microglial cell activation	2/48	19/18723	0.00107033	0.0101286	0.00543606	LRRK2/IL6	2
GO:1904406	GO:1904406	negative regulation of nitric oxide metabolic process	2/48	19/18723	0.00107033	0.0101286	0.00543606	PTGIS/GLA	2
GO:0043405	GO:0043405	regulation of MAP kinase activity	4/48	177/18723	0.00108602	0.0102372	0.00549436	LRRK2/MAP3K5/HMGCR/APOE	4
GO:0052547	GO:0052547	regulation of peptidase activity	6/48	461/18723	0.00110227	0.0103503	0.00555502	SNCA/BOK/COL7A1/FN1/MAP3K5/SERPINA1	6
GO:0035265	GO:0035265	organ growth	4/48	178/18723	0.00110891	0.0103726	0.00556701	ESR1/CDK1/COMP/IGF1	4
GO:0070372	GO:0070372	regulation of ERK1 and ERK2 cascade	5/48	309/18723	0.00113523	0.0105781	0.00567728	CCL2/FN1/HMGCR/APOE/IGF1	5
GO:0032409	GO:0032409	regulation of transporter activity	5/48	310/18723	0.00115164	0.0106552	0.00571868	RYR2/SNCA/PLN/CCL2/DMD	5
GO:0033674	GO:0033674	positive regulation of kinase activity	6/48	467/18723	0.001178	0.0106552	0.00571868	SNCA/LRRK2/TXN/MAP2K6/MAP3K5/IGF1	6
GO:0045766	GO:0045766	positive regulation of angiogenesis	4/48	181/18723	0.00117962	0.0106552	0.00571868	PTGIS/HMOX1/XBP1/CXCL8	4
GO:1904018	GO:1904018	positive regulation of vasculature development	4/48	181/18723	0.00117962	0.0106552	0.00571868	PTGIS/HMOX1/XBP1/CXCL8	4
GO:1905952	GO:1905952	regulation of lipid localization	4/48	181/18723	0.00117962	0.0106552	0.00571868	APOA1/MAP2K6/APOE/IL6	4
GO:0070588	GO:0070588	calcium ion transmembrane transport	5/48	312/18723	0.00118499	0.0106552	0.00571868	ITPR1/RYR2/SNCA/PLN/DMD	5
GO:0043691	GO:0043691	reverse cholesterol transport	2/48	20/18723	0.00118732	0.0106552	0.00571868	APOA1/APOE	2
GO:0051900	GO:0051900	regulation of mitochondrial depolarization	2/48	20/18723	0.00118732	0.0106552	0.00571868	BOK/LRRK2	2
GO:1902236	GO:1902236	negative regulation of endoplasmic reticulum stress-induced intrinsic apoptotic signaling pathway	2/48	20/18723	0.00118732	0.0106552	0.00571868	LRRK2/XBP1	2
GO:1903206	GO:1903206	negative regulation of hydrogen peroxide-induced cell death	2/48	20/18723	0.00118732	0.0106552	0.00571868	LRRK2/TXN	2
GO:0055001	GO:0055001	muscle cell development	4/48	184/18723	0.00125343	0.0112072	0.00601492	CDK1/DMD/COMP/IGF1	4
GO:0043367	GO:0043367	CD4-positive, alpha-beta T cell differentiation	3/48	83/18723	0.00125825	0.0112091	0.00601594	RSAD2/HLA-DRA/IL6	3
GO:0043433	GO:0043433	negative regulation of DNA-binding transcription factor activity	4/48	185/18723	0.00127874	0.01135	0.00609158	PTGIS/ESR1/HMOX1/NUPR1	4
GO:0032370	GO:0032370	positive regulation of lipid transport	3/48	84/18723	0.00130252	0.0114773	0.00615988	APOA1/MAP2K6/APOE	3
GO:1900542	GO:1900542	regulation of purine nucleotide metabolic process	3/48	84/18723	0.00130252	0.0114773	0.00615988	SNCA/NUPR1/IGF1	3
GO:0008202	GO:0008202	steroid metabolic process	5/48	319/18723	0.00130738	0.0114785	0.00616057	ESR1/HSD11B1/APOA1/HMGCR/APOE	5
GO:0071496	GO:0071496	cellular response to external stimulus	5/48	320/18723	0.0013256	0.0115821	0.00621615	VCAM1/HMOX1/LRRK2/XBP1/MAP3K5	5
GO:0061136	GO:0061136	regulation of proteasomal protein catabolic process	4/48	187/18723	0.00133043	0.0115821	0.00621615	AQP11/LRRK2/NUPR1/APOE	4
GO:0002709	GO:0002709	regulation of T cell mediated immunity	3/48	85/18723	0.00134775	0.0115821	0.00621615	RSAD2/HLA-DRA/IL6	3
GO:0045069	GO:0045069	regulation of viral genome replication	3/48	85/18723	0.00134775	0.0115821	0.00621615	RSAD2/MX1/CXCL8	3
GO:0097006	GO:0097006	regulation of plasma lipoprotein particle levels	3/48	85/18723	0.00134775	0.0115821	0.00621615	APOA1/HMOX1/APOE	3
GO:0097194	GO:0097194	execution phase of apoptosis	3/48	85/18723	0.00134775	0.0115821	0.00621615	PTGIS/BOK/IL6	3
GO:0006140	GO:0006140	regulation of nucleotide metabolic process	3/48	86/18723	0.00139397	0.0119371	0.00640666	SNCA/NUPR1/IGF1	3
GO:0035584	GO:0035584	calcium-mediated signaling using intracellular calcium source	2/48	22/18723	0.00143882	0.0120444	0.00646426	VCAM1/RYR2	2
GO:0060965	GO:0060965	negative regulation of gene silencing by miRNA	2/48	22/18723	0.00143882	0.0120444	0.00646426	ESR1/IL6	2
GO:0072574	GO:0072574	hepatocyte proliferation	2/48	22/18723	0.00143882	0.0120444	0.00646426	XBP1/IL6	2
GO:0072575	GO:0072575	epithelial cell proliferation involved in liver morphogenesis	2/48	22/18723	0.00143882	0.0120444	0.00646426	XBP1/IL6	2
GO:1901032	GO:1901032	negative regulation of response to reactive oxygen species	2/48	22/18723	0.00143882	0.0120444	0.00646426	LRRK2/TXN	2
GO:0019915	GO:0019915	lipid storage	3/48	87/18723	0.00144116	0.0120444	0.00646426	APOA1/APOE/IL6	3
GO:1903578	GO:1903578	regulation of ATP metabolic process	3/48	87/18723	0.00144116	0.0120444	0.00646426	SNCA/NUPR1/IGF1	3
GO:0009117	GO:0009117	nucleotide metabolic process	6/48	489/18723	0.00149047	0.0124028	0.00665661	PTGIS/SNCA/LRRK2/NUPR1/HMGCR/IGF1	6
GO:0001935	GO:0001935	endothelial cell proliferation	4/48	193/18723	0.00149425	0.0124028	0.00665661	APOA1/HMOX1/CCL2/APOE	4
GO:0010498	GO:0010498	proteasomal protein catabolic process	6/48	490/18723	0.00150604	0.0124582	0.00668634	AQP11/UBXN8/LRRK2/DNAJC10/NUPR1/APOE	6
GO:0002082	GO:0002082	regulation of oxidative phosphorylation	2/48	23/18723	0.00157328	0.0127116	0.00682239	SNCA/NUPR1	2
GO:0035640	GO:0035640	exploration behavior	2/48	23/18723	0.00157328	0.0127116	0.00682239	LRRK2/APOE	2
GO:0035994	GO:0035994	response to muscle stretch	2/48	23/18723	0.00157328	0.0127116	0.00682239	RYR2/DMD	2
GO:0051882	GO:0051882	mitochondrial depolarization	2/48	23/18723	0.00157328	0.0127116	0.00682239	BOK/LRRK2	2
GO:0060353	GO:0060353	regulation of cell adhesion molecule production	2/48	23/18723	0.00157328	0.0127116	0.00682239	APOA1/CXCL8	2
GO:0060547	GO:0060547	negative regulation of necrotic cell death	2/48	23/18723	0.00157328	0.0127116	0.00682239	BOK/NUPR1	2
GO:0072576	GO:0072576	liver morphogenesis	2/48	23/18723	0.00157328	0.0127116	0.00682239	XBP1/IL6	2
GO:1904705	GO:1904705	regulation of vascular associated smooth muscle cell proliferation	3/48	90/18723	0.00158876	0.0127942	0.0068667	HMOX1/MAP3K5/IGF1	3
GO:0062012	GO:0062012	regulation of small molecule metabolic process	5/48	334/18723	0.00160093	0.0128497	0.00689648	SNCA/APOA1/NUPR1/APOE/IGF1	5
GO:0010952	GO:0010952	positive regulation of peptidase activity	4/48	197/18723	0.00161098	0.0128878	0.00691695	SNCA/BOK/FN1/MAP3K5	4
GO:0006753	GO:0006753	nucleoside phosphate metabolic process	6/48	497/18723	0.00161857	0.0129061	0.00692676	PTGIS/SNCA/LRRK2/NUPR1/HMGCR/IGF1	6
GO:0060191	GO:0060191	regulation of lipase activity	3/48	91/18723	0.00163998	0.0129916	0.00697264	ESR1/SNCA/APOA1	3
GO:1990874	GO:1990874	vascular associated smooth muscle cell proliferation	3/48	91/18723	0.00163998	0.0129916	0.00697264	HMOX1/MAP3K5/IGF1	3
GO:0032386	GO:0032386	regulation of intracellular transport	5/48	337/18723	0.00166503	0.0131472	0.00705616	STX18/PLN/LRRK2/CDK1/TXN	5
GO:0071902	GO:0071902	positive regulation of protein serine/threonine kinase activity	4/48	200/18723	0.0017026	0.0133565	0.00716848	SNCA/LRRK2/MAP2K6/MAP3K5	4
GO:0002726	GO:0002726	positive regulation of T cell cytokine production	2/48	24/18723	0.0017135	0.0133565	0.00716848	RSAD2/IL6	2
GO:0060149	GO:0060149	negative regulation of posttranscriptional gene silencing	2/48	24/18723	0.0017135	0.0133565	0.00716848	ESR1/IL6	2
GO:0060967	GO:0060967	negative regulation of gene silencing by RNA	2/48	24/18723	0.0017135	0.0133565	0.00716848	ESR1/IL6	2
GO:1901019	GO:1901019	regulation of calcium ion transmembrane transporter activity	3/48	93/18723	0.0017455	0.0135625	0.00727903	RYR2/PLN/DMD	3
GO:0045765	GO:0045765	regulation of angiogenesis	5/48	342/18723	0.00177603	0.0137558	0.00738277	PTGIS/HMOX1/XBP1/IL6/CXCL8	5
GO:0036473	GO:0036473	cell death in response to oxidative stress	3/48	95/18723	0.00185518	0.0142656	0.00765641	LRRK2/TXN/MAP3K5	3
GO:0045109	GO:0045109	intermediate filament organization	2/48	25/18723	0.00185946	0.0142656	0.00765641	DSP/DES	2
GO:1903798	GO:1903798	regulation of production of miRNAs involved in gene silencing by miRNA	2/48	25/18723	0.00185946	0.0142656	0.00765641	ESR1/IL6	2
GO:0010639	GO:0010639	negative regulation of organelle organization	5/48	348/18723	0.00191632	0.0146097	0.00784109	SNCA/BOK/LRRK2/NUPR1/IGF1	5
GO:1901342	GO:1901342	regulation of vasculature development	5/48	348/18723	0.00191632	0.0146097	0.00784109	PTGIS/HMOX1/XBP1/IL6/CXCL8	5
GO:0070252	GO:0070252	actin-mediated cell contraction	3/48	97/18723	0.00196908	0.0148664	0.00797887	RYR2/DSP/PLN	3
GO:1901216	GO:1901216	positive regulation of neuron death	3/48	97/18723	0.00196908	0.0148664	0.00797887	SNCA/NUPR1/MAP3K5	3
GO:0045861	GO:0045861	negative regulation of proteolysis	5/48	351/18723	0.00198944	0.0148664	0.00797887	SNCA/AQP11/COL7A1/LRRK2/SERPINA1	5
GO:0071222	GO:0071222	cellular response to lipopolysaccharide	4/48	209/18723	0.00199915	0.0148664	0.00797887	CCL2/XBP1/IL6/CXCL8	4
GO:0002026	GO:0002026	regulation of the force of heart contraction	2/48	26/18723	0.00201113	0.0148664	0.00797887	RYR2/PLN	2
GO:0006706	GO:0006706	steroid catabolic process	2/48	26/18723	0.00201113	0.0148664	0.00797887	HSD11B1/APOE	2
GO:0010875	GO:0010875	positive regulation of cholesterol efflux	2/48	26/18723	0.00201113	0.0148664	0.00797887	APOA1/APOE	2
GO:0060314	GO:0060314	regulation of ryanodine-sensitive calcium-release channel activity	2/48	26/18723	0.00201113	0.0148664	0.00797887	PLN/DMD	2
GO:0060352	GO:0060352	cell adhesion molecule production	2/48	26/18723	0.00201113	0.0148664	0.00797887	APOA1/CXCL8	2
GO:0070920	GO:0070920	regulation of production of small RNA involved in gene silencing by RNA	2/48	26/18723	0.00201113	0.0148664	0.00797887	ESR1/IL6	2
GO:0061337	GO:0061337	cardiac conduction	3/48	98/18723	0.00202762	0.0148937	0.00799353	RYR2/DSP/PLN	3
GO:2001243	GO:2001243	negative regulation of intrinsic apoptotic signaling pathway	3/48	98/18723	0.00202762	0.0148937	0.00799353	LRRK2/MUC1/XBP1	3
GO:0002685	GO:0002685	regulation of leukocyte migration	4/48	210/18723	0.00203416	0.0148937	0.00799353	HMOX1/CCL2/IL6/CXCL8	4
GO:0006066	GO:0006066	alcohol metabolic process	5/48	353/18723	0.00203932	0.0148937	0.00799353	SNCA/APOA1/HMGCR/APOE/IGF1	5
GO:0001818	GO:0001818	negative regulation of cytokine production	5/48	357/18723	0.0021418	0.0154203	0.00827611	APOA1/HMOX1/FN1/IGF1/IL6	5
GO:1904062	GO:1904062	regulation of cation transmembrane transport	5/48	357/18723	0.0021418	0.0154203	0.00827611	RYR2/SNCA/PLN/CCL2/DMD	5
GO:0045807	GO:0045807	positive regulation of endocytosis	3/48	100/18723	0.00214795	0.0154203	0.00827611	SNCA/LRRK2/APOE	3
GO:0002719	GO:0002719	negative regulation of cytokine production involved in immune response	2/48	27/18723	0.00216847	0.0154203	0.00827611	APOA1/HMOX1	2
GO:0034377	GO:0034377	plasma lipoprotein particle assembly	2/48	27/18723	0.00216847	0.0154203	0.00827611	APOA1/APOE	2
GO:0098901	GO:0098901	regulation of cardiac muscle cell action potential	2/48	27/18723	0.00216847	0.0154203	0.00827611	RYR2/DSP	2
GO:1902883	GO:1902883	negative regulation of response to oxidative stress	2/48	27/18723	0.00216847	0.0154203	0.00827611	LRRK2/TXN	2
GO:1903205	GO:1903205	regulation of hydrogen peroxide-induced cell death	2/48	27/18723	0.00216847	0.0154203	0.00827611	LRRK2/TXN	2
GO:1903421	GO:1903421	regulation of synaptic vesicle recycling	2/48	27/18723	0.00216847	0.0154203	0.00827611	SNCA/LRRK2	2
GO:0042102	GO:0042102	positive regulation of T cell proliferation	3/48	101/18723	0.00220974	0.0156641	0.00840697	VCAM1/IGF1/IL6	3
GO:0031669	GO:0031669	cellular response to nutrient levels	4/48	215/18723	0.00221564	0.0156641	0.00840697	HMOX1/LRRK2/XBP1/MAP3K5	4
GO:0035710	GO:0035710	CD4-positive, alpha-beta T cell activation	3/48	102/18723	0.00227263	0.0160204	0.00859822	RSAD2/HLA-DRA/IL6	3
GO:0070374	GO:0070374	positive regulation of ERK1 and ERK2 cascade	4/48	217/18723	0.00229127	0.0161051	0.00864368	CCL2/HMGCR/APOE/IGF1	4
GO:0002313	GO:0002313	mature B cell differentiation involved in immune response	2/48	28/18723	0.00233147	0.0163404	0.00876997	XBP1/IL6	2
GO:0009150	GO:0009150	purine ribonucleotide metabolic process	5/48	368/18723	0.00244308	0.017009	0.00912881	SNCA/LRRK2/NUPR1/HMGCR/IGF1	5
GO:0071219	GO:0071219	cellular response to molecule of bacterial origin	4/48	221/18723	0.00244785	0.017009	0.00912881	CCL2/XBP1/IL6/CXCL8	4
GO:1903050	GO:1903050	regulation of proteolysis involved in cellular protein catabolic process	4/48	221/18723	0.00244785	0.017009	0.00912881	AQP11/LRRK2/NUPR1/APOE	4
GO:0050900	GO:0050900	leukocyte migration	5/48	369/18723	0.00247192	0.0171274	0.00919231	VCAM1/HMOX1/CCL2/IL6/CXCL8	5
GO:0060969	GO:0060969	negative regulation of gene silencing	2/48	29/18723	0.00250009	0.0171274	0.00919231	ESR1/IL6	2
GO:0062098	GO:0062098	regulation of programmed necrotic cell death	2/48	29/18723	0.00250009	0.0171274	0.00919231	BOK/NUPR1	2
GO:1900117	GO:1900117	regulation of execution phase of apoptosis	2/48	29/18723	0.00250009	0.0171274	0.00919231	PTGIS/BOK	2
GO:1902430	GO:1902430	negative regulation of amyloid-beta formation	2/48	29/18723	0.00250009	0.0171274	0.00919231	APOE/IGF1	2
GO:0042116	GO:0042116	macrophage activation	3/48	106/18723	0.00253529	0.0173197	0.00929556	SNCA/LRRK2/IL6	3
GO:0002824	GO:0002824	positive regulation of adaptive immune response based on somatic recombination of immune receptors built from immunoglobulin superfamily domains	3/48	107/18723	0.00260376	0.0175781	0.00943422	RSAD2/HLA-DRA/IL6	3
GO:0036503	GO:0036503	ERAD pathway	3/48	107/18723	0.00260376	0.0175781	0.00943422	AQP11/UBXN8/DNAJC10	3
GO:0071868	GO:0071868	cellular response to monoamine stimulus	3/48	107/18723	0.00260376	0.0175781	0.00943422	RYR2/SNCA/LRRK2	3
GO:0071870	GO:0071870	cellular response to catecholamine stimulus	3/48	107/18723	0.00260376	0.0175781	0.00943422	RYR2/SNCA/LRRK2	3
GO:0010001	GO:0010001	glial cell differentiation	4/48	225/18723	0.00261165	0.0175781	0.00943422	BOK/CDK1/NDRG1/IL6	4
GO:0030098	GO:0030098	lymphocyte differentiation	5/48	374/18723	0.00261988	0.0175781	0.00943422	VCAM1/RSAD2/XBP1/HLA-DRA/IL6	5
GO:0002703	GO:0002703	regulation of leukocyte mediated immunity	4/48	226/18723	0.00265375	0.0175781	0.00943422	HMOX1/RSAD2/HLA-DRA/IL6	4
GO:0033138	GO:0033138	positive regulation of peptidyl-serine phosphorylation	3/48	108/18723	0.00267336	0.0175781	0.00943422	SNCA/TXN/IL6	3
GO:0006921	GO:0006921	cellular component disassembly involved in execution phase of apoptosis	2/48	30/18723	0.0026743	0.0175781	0.00943422	BOK/IL6	2
GO:0034368	GO:0034368	protein-lipid complex remodeling	2/48	30/18723	0.0026743	0.0175781	0.00943422	APOA1/APOE	2
GO:0034369	GO:0034369	plasma lipoprotein particle remodeling	2/48	30/18723	0.0026743	0.0175781	0.00943422	APOA1/APOE	2
GO:0045940	GO:0045940	positive regulation of steroid metabolic process	2/48	30/18723	0.0026743	0.0175781	0.00943422	APOA1/APOE	2
GO:1900101	GO:1900101	regulation of endoplasmic reticulum unfolded protein response	2/48	30/18723	0.0026743	0.0175781	0.00943422	BOK/XBP1	2
GO:1903579	GO:1903579	negative regulation of ATP metabolic process	2/48	30/18723	0.0026743	0.0175781	0.00943422	SNCA/NUPR1	2
GO:0002456	GO:0002456	T cell mediated immunity	3/48	109/18723	0.00274411	0.01794	0.00962846	RSAD2/HLA-DRA/IL6	3
GO:0032414	GO:0032414	positive regulation of ion transmembrane transporter activity	3/48	109/18723	0.00274411	0.01794	0.00962846	RYR2/CCL2/DMD	3
GO:0032611	GO:0032611	interleukin-1 beta production	3/48	110/18723	0.00281601	0.0182627	0.00980168	APOA1/IGF1/IL6	3
GO:0032651	GO:0032651	regulation of interleukin-1 beta production	3/48	110/18723	0.00281601	0.0182627	0.00980168	APOA1/IGF1/IL6	3
GO:1905954	GO:1905954	positive regulation of lipid localization	3/48	110/18723	0.00281601	0.0182627	0.00980168	APOA1/MAP2K6/APOE	3
GO:0002828	GO:0002828	regulation of type 2 immune response	2/48	31/18723	0.00285407	0.0183142	0.00982932	RSAD2/IL6	2
GO:0032148	GO:0032148	activation of protein kinase B activity	2/48	31/18723	0.00285407	0.0183142	0.00982932	TXN/IGF1	2
GO:0036474	GO:0036474	cell death in response to hydrogen peroxide	2/48	31/18723	0.00285407	0.0183142	0.00982932	LRRK2/TXN	2
GO:0065005	GO:0065005	protein-lipid complex assembly	2/48	31/18723	0.00285407	0.0183142	0.00982932	APOA1/APOE	2
GO:0071867	GO:0071867	response to monoamine	3/48	111/18723	0.00288906	0.0184414	0.00989759	RYR2/SNCA/LRRK2	3
GO:0071869	GO:0071869	response to catecholamine	3/48	111/18723	0.00288906	0.0184414	0.00989759	RYR2/SNCA/LRRK2	3
GO:0042692	GO:0042692	muscle cell differentiation	5/48	384/18723	0.00293501	0.0186857	0.0100287	CDK1/DMD/XBP1/COMP/IGF1	5
GO:0002821	GO:0002821	positive regulation of adaptive immune response	3/48	112/18723	0.00296327	0.0187483	0.0100623	RSAD2/HLA-DRA/IL6	3
GO:0046632	GO:0046632	alpha-beta T cell differentiation	3/48	112/18723	0.00296327	0.0187483	0.0100623	RSAD2/HLA-DRA/IL6	3
GO:0009259	GO:0009259	ribonucleotide metabolic process	5/48	385/18723	0.00296797	0.0187483	0.0100623	SNCA/LRRK2/NUPR1/HMGCR/IGF1	5
GO:0002708	GO:0002708	positive regulation of lymphocyte mediated immunity	3/48	113/18723	0.00303864	0.0189532	0.0101723	RSAD2/HLA-DRA/IL6	3
GO:0044344	GO:0044344	cellular response to fibroblast growth factor stimulus	3/48	113/18723	0.00303864	0.0189532	0.0101723	SNCA/CCL2/CXCL8	3
GO:0010039	GO:0010039	response to iron ion	2/48	32/18723	0.00303938	0.0189532	0.0101723	SNCA/HMOX1	2
GO:0034367	GO:0034367	protein-containing complex remodeling	2/48	32/18723	0.00303938	0.0189532	0.0101723	APOA1/APOE	2
GO:0042044	GO:0042044	fluid transport	2/48	32/18723	0.00303938	0.0189532	0.0101723	ITPR1/AQP11	2
GO:1901617	GO:1901617	organic hydroxy compound biosynthetic process	4/48	237/18723	0.00314811	0.0195811	0.0105092	SNCA/APOA1/HMGCR/APOE	4
GO:0002335	GO:0002335	mature B cell differentiation	2/48	33/18723	0.00323019	0.019838	0.0106471	XBP1/IL6	2
GO:0010259	GO:0010259	multicellular organism aging	2/48	33/18723	0.00323019	0.019838	0.0106471	LRRK2/COMP	2
GO:0045920	GO:0045920	negative regulation of exocytosis	2/48	33/18723	0.00323019	0.019838	0.0106471	SNCA/HMOX1	2
GO:1902992	GO:1902992	negative regulation of amyloid precursor protein catabolic process	2/48	33/18723	0.00323019	0.019838	0.0106471	APOE/IGF1	2
GO:1903715	GO:1903715	regulation of aerobic respiration	2/48	33/18723	0.00323019	0.019838	0.0106471	SNCA/NUPR1	2
GO:0051403	GO:0051403	stress-activated MAPK cascade	4/48	239/18723	0.0032443	0.0198744	0.0106667	LRRK2/MAP2K6/MAP3K5/HMGCR	4
GO:0006163	GO:0006163	purine nucleotide metabolic process	5/48	396/18723	0.00334847	0.0203798	0.0109379	SNCA/LRRK2/NUPR1/HMGCR/IGF1	5
GO:0019693	GO:0019693	ribose phosphate metabolic process	5/48	396/18723	0.00334847	0.0203798	0.0109379	SNCA/LRRK2/NUPR1/HMGCR/IGF1	5
GO:0002702	GO:0002702	positive regulation of production of molecular mediator of immune response	3/48	117/18723	0.00335194	0.0203798	0.0109379	RSAD2/XBP1/IL6	3
GO:0010661	GO:0010661	positive regulation of muscle cell apoptotic process	2/48	34/18723	0.00342649	0.0207187	0.0111198	MAP3K5/HMGCR	2
GO:0022612	GO:0022612	gland morphogenesis	3/48	118/18723	0.00343324	0.0207187	0.0111198	ESR1/XBP1/IL6	3
GO:0051101	GO:0051101	regulation of DNA binding	3/48	118/18723	0.00343324	0.0207187	0.0111198	HMOX1/TXN/IGF1	3
GO:0071216	GO:0071216	cellular response to biotic stimulus	4/48	246/18723	0.00359679	0.0214692	0.0115226	CCL2/XBP1/IL6/CXCL8	4
GO:0032411	GO:0032411	positive regulation of transporter activity	3/48	120/18723	0.00359944	0.0214692	0.0115226	RYR2/CCL2/DMD	3
GO:0071774	GO:0071774	response to fibroblast growth factor	3/48	120/18723	0.00359944	0.0214692	0.0115226	SNCA/CCL2/CXCL8	3
GO:0010664	GO:0010664	negative regulation of striated muscle cell apoptotic process	2/48	35/18723	0.00362823	0.0214692	0.0115226	NUPR1/HMGCR	2
GO:0018149	GO:0018149	peptide cross-linking	2/48	35/18723	0.00362823	0.0214692	0.0115226	DSP/FN1	2
GO:0035633	GO:0035633	maintenance of blood-brain barrier	2/48	35/18723	0.00362823	0.0214692	0.0115226	DMD/IL6	2
GO:0086005	GO:0086005	ventricular cardiac muscle cell action potential	2/48	35/18723	0.00362823	0.0214692	0.0115226	RYR2/DSP	2
GO:0097421	GO:0097421	liver regeneration	2/48	35/18723	0.00362823	0.0214692	0.0115226	HMOX1/IL6	2
GO:0031098	GO:0031098	stress-activated protein kinase signaling cascade	4/48	247/18723	0.00364918	0.0215408	0.011561	LRRK2/MAP2K6/MAP3K5/HMGCR	4
GO:0042177	GO:0042177	negative regulation of protein catabolic process	3/48	121/18723	0.00368437	0.0216958	0.0116442	SNCA/AQP11/HMGCR	3
GO:0010959	GO:0010959	regulation of metal ion transport	5/48	406/18723	0.00372393	0.0218759	0.0117409	RYR2/SNCA/PLN/CCL2/DMD	5
GO:0002688	GO:0002688	regulation of leukocyte chemotaxis	3/48	122/18723	0.0037705	0.022043	0.0118305	CCL2/IL6/CXCL8	3
GO:0051928	GO:0051928	positive regulation of calcium ion transport	3/48	122/18723	0.0037705	0.022043	0.0118305	RYR2/SNCA/CCL2	3
GO:0042092	GO:0042092	type 2 immune response	2/48	36/18723	0.0038354	0.0223686	0.0120053	RSAD2/IL6	2
GO:0002369	GO:0002369	T cell cytokine production	2/48	37/18723	0.00404796	0.0234956	0.0126102	RSAD2/IL6	2
GO:0002724	GO:0002724	regulation of T cell cytokine production	2/48	37/18723	0.00404796	0.0234956	0.0126102	RSAD2/IL6	2
GO:1903362	GO:1903362	regulation of cellular protein catabolic process	4/48	255/18723	0.00408722	0.0236669	0.0127021	AQP11/LRRK2/NUPR1/APOE	4
GO:2001235	GO:2001235	positive regulation of apoptotic signaling pathway	3/48	126/18723	0.00412735	0.0237946	0.0127707	RNF183/BOK/NUPR1	3
GO:0072521	GO:0072521	purine-containing compound metabolic process	5/48	416/18723	0.00412884	0.0237946	0.0127707	SNCA/LRRK2/NUPR1/HMGCR/IGF1	5
GO:0030217	GO:0030217	T cell differentiation	4/48	257/18723	0.00420205	0.0241271	0.0129491	RSAD2/XBP1/HLA-DRA/IL6	4
GO:0030048	GO:0030048	actin filament-based movement	3/48	127/18723	0.00421966	0.0241271	0.0129491	RYR2/DSP/PLN	3
GO:0031348	GO:0031348	negative regulation of defense response	4/48	258/18723	0.00426028	0.0241271	0.0129491	PTGIS/APOA1/APOE/IGF1	4
GO:0032373	GO:0032373	positive regulation of sterol transport	2/48	38/18723	0.00426589	0.0241271	0.0129491	APOA1/APOE	2
GO:0032376	GO:0032376	positive regulation of cholesterol transport	2/48	38/18723	0.00426589	0.0241271	0.0129491	APOA1/APOE	2
GO:0097242	GO:0097242	amyloid-beta clearance	2/48	38/18723	0.00426589	0.0241271	0.0129491	HMGCR/APOE	2
GO:1901031	GO:1901031	regulation of response to reactive oxygen species	2/48	38/18723	0.00426589	0.0241271	0.0129491	LRRK2/TXN	2
GO:1903580	GO:1903580	positive regulation of ATP metabolic process	2/48	38/18723	0.00426589	0.0241271	0.0129491	NUPR1/IGF1	2
GO:0032612	GO:0032612	interleukin-1 production	3/48	128/18723	0.00431322	0.0242819	0.0130322	APOA1/IGF1/IL6	3
GO:0032652	GO:0032652	regulation of interleukin-1 production	3/48	128/18723	0.00431322	0.0242819	0.0130322	APOA1/IGF1/IL6	3
GO:0006638	GO:0006638	neutral lipid metabolic process	3/48	129/18723	0.00440804	0.0247013	0.0132573	SNCA/APOA1/APOE	3
GO:0043280	GO:0043280	positive regulation of cysteine-type endopeptidase activity involved in apoptotic process	3/48	129/18723	0.00440804	0.0247013	0.0132573	SNCA/BOK/MAP3K5	3
GO:0002701	GO:0002701	negative regulation of production of molecular mediator of immune response	2/48	39/18723	0.00448916	0.0249789	0.0134063	APOA1/HMOX1	2
GO:0090207	GO:0090207	regulation of triglyceride metabolic process	2/48	39/18723	0.00448916	0.0249789	0.0134063	APOA1/APOE	2
GO:2000785	GO:2000785	regulation of autophagosome assembly	2/48	39/18723	0.00448916	0.0249789	0.0134063	LRRK2/NUPR1	2
GO:0009636	GO:0009636	response to toxic substance	4/48	262/18723	0.00449867	0.0249789	0.0134063	CDK1/TXN/NUPR1/APOE	4
GO:1903131	GO:1903131	mononuclear cell differentiation	5/48	426/18723	0.00456445	0.0252864	0.0135713	VCAM1/RSAD2/XBP1/HLA-DRA/IL6	5
GO:0032103	GO:0032103	positive regulation of response to external stimulus	5/48	427/18723	0.00460975	0.0254794	0.0136749	SNCA/LRRK2/NUPR1/IL6/CXCL8	5
GO:0030522	GO:0030522	intracellular receptor signaling pathway	4/48	265/18723	0.00468327	0.025827	0.0138614	PTGIS/ESR1/MAP2K6/NR3C2	4
GO:0007569	GO:0007569	cell aging	3/48	132/18723	0.00470007	0.0258413	0.0138691	CDK1/MAP2K6/MAP3K5	3
GO:0010543	GO:0010543	regulation of platelet activation	2/48	40/18723	0.00471773	0.0258413	0.0138691	APOE/IL6	2
GO:0014037	GO:0014037	Schwann cell differentiation	2/48	40/18723	0.00471773	0.0258413	0.0138691	CDK1/NDRG1	2
GO:0032412	GO:0032412	regulation of ion transmembrane transporter activity	4/48	267/18723	0.00480914	0.0262827	0.014106	RYR2/PLN/CCL2/DMD	4
GO:0052548	GO:0052548	regulation of endopeptidase activity	5/48	432/18723	0.00484108	0.026398	0.0141679	SNCA/BOK/COL7A1/MAP3K5/SERPINA1	5
GO:0001508	GO:0001508	action potential	3/48	134/18723	0.00490112	0.0265468	0.0142478	RYR2/DSP/DMD	3
GO:0002705	GO:0002705	positive regulation of leukocyte mediated immunity	3/48	134/18723	0.00490112	0.0265468	0.0142478	RSAD2/HLA-DRA/IL6	3
GO:0061041	GO:0061041	regulation of wound healing	3/48	134/18723	0.00490112	0.0265468	0.0142478	XBP1/HMGCR/APOE	3
GO:0055023	GO:0055023	positive regulation of cardiac muscle tissue growth	2/48	41/18723	0.0049516	0.0267013	0.0143307	CDK1/IGF1	2
GO:1902116	GO:1902116	negative regulation of organelle assembly	2/48	41/18723	0.0049516	0.0267013	0.0143307	LRRK2/NUPR1	2
GO:0048732	GO:0048732	gland development	5/48	436/18723	0.00503203	0.027075	0.0145312	ESR1/APOA1/HMOX1/XBP1/IL6	5
GO:0010939	GO:0010939	regulation of necrotic cell death	2/48	42/18723	0.00519071	0.0274034	0.0147075	BOK/NUPR1	2
GO:0032691	GO:0032691	negative regulation of interleukin-1 beta production	2/48	42/18723	0.00519071	0.0274034	0.0147075	APOA1/IGF1	2
GO:0046688	GO:0046688	response to copper ion	2/48	42/18723	0.00519071	0.0274034	0.0147075	SNCA/CDK1	2
GO:0048489	GO:0048489	synaptic vesicle transport	2/48	42/18723	0.00519071	0.0274034	0.0147075	SNCA/LRRK2	2
GO:0090317	GO:0090317	negative regulation of intracellular protein transport	2/48	42/18723	0.00519071	0.0274034	0.0147075	LRRK2/TXN	2
GO:1904037	GO:1904037	positive regulation of epithelial cell apoptotic process	2/48	42/18723	0.00519071	0.0274034	0.0147075	CCL2/IL6	2
GO:0006986	GO:0006986	response to unfolded protein	3/48	137/18723	0.00521234	0.0274034	0.0147075	BOK/XBP1/COMP	3
GO:0008203	GO:0008203	cholesterol metabolic process	3/48	137/18723	0.00521234	0.0274034	0.0147075	APOA1/HMGCR/APOE	3
GO:0045471	GO:0045471	response to ethanol	3/48	137/18723	0.00521234	0.0274034	0.0147075	VCAM1/CDK1/HMGCR	3
GO:0050671	GO:0050671	positive regulation of lymphocyte proliferation	3/48	137/18723	0.00521234	0.0274034	0.0147075	VCAM1/IGF1/IL6	3
GO:0002443	GO:0002443	leukocyte mediated immunity	5/48	440/18723	0.00522829	0.0274034	0.0147075	HMOX1/C1R/RSAD2/HLA-DRA/IL6	5
GO:0051090	GO:0051090	regulation of DNA-binding transcription factor activity	5/48	440/18723	0.00522829	0.0274034	0.0147075	PTGIS/ESR1/HMOX1/NUPR1/IL6	5
GO:0032946	GO:0032946	positive regulation of mononuclear cell proliferation	3/48	138/18723	0.00531867	0.0278172	0.0149296	VCAM1/IGF1/IL6	3
GO:0002366	GO:0002366	leukocyte activation involved in immune response	4/48	275/18723	0.00533544	0.027845	0.0149445	HMOX1/XBP1/HLA-DRA/IL6	4
GO:0042771	GO:0042771	intrinsic apoptotic signaling pathway in response to DNA damage by p53 class mediator	2/48	43/18723	0.00543506	0.0283042	0.015191	MUC1/NUPR1	2
GO:0046034	GO:0046034	ATP metabolic process	4/48	277/18723	0.00547281	0.0284399	0.0152638	SNCA/CDK1/NUPR1/IGF1	4
GO:0031349	GO:0031349	positive regulation of defense response	4/48	278/18723	0.00554238	0.02874	0.0154249	SNCA/LRRK2/NUPR1/IL6	4
GO:0002263	GO:0002263	cell activation involved in immune response	4/48	279/18723	0.00561254	0.0288442	0.0154808	HMOX1/XBP1/HLA-DRA/IL6	4
GO:0006119	GO:0006119	oxidative phosphorylation	3/48	141/18723	0.00564549	0.0288442	0.0154808	SNCA/CDK1/NUPR1	3
GO:0008584	GO:0008584	male gonad development	3/48	141/18723	0.00564549	0.0288442	0.0154808	ESR1/BOK/NUPR1	3
GO:0016241	GO:0016241	regulation of macroautophagy	3/48	141/18723	0.00564549	0.0288442	0.0154808	HMOX1/LRRK2/NUPR1	3
GO:0030183	GO:0030183	B cell differentiation	3/48	141/18723	0.00564549	0.0288442	0.0154808	VCAM1/XBP1/IL6	3
GO:0035296	GO:0035296	regulation of tube diameter	3/48	141/18723	0.00564549	0.0288442	0.0154808	HMGCR/COMP/APOE	3
GO:0097746	GO:0097746	blood vessel diameter maintenance	3/48	141/18723	0.00564549	0.0288442	0.0154808	HMGCR/COMP/APOE	3
GO:0050999	GO:0050999	regulation of nitric-oxide synthase activity	2/48	44/18723	0.00568461	0.0289832	0.0155554	APOE/GLA	2
GO:0035150	GO:0035150	regulation of tube size	3/48	142/18723	0.00575706	0.02923	0.0156878	HMGCR/COMP/APOE	3
GO:0046546	GO:0046546	development of primary male sexual characteristics	3/48	142/18723	0.00575706	0.02923	0.0156878	ESR1/BOK/NUPR1	3
GO:0062013	GO:0062013	positive regulation of small molecule metabolic process	3/48	143/18723	0.00586994	0.0295388	0.0158536	SNCA/APOA1/IGF1	3
GO:0003254	GO:0003254	regulation of membrane depolarization	2/48	45/18723	0.00593934	0.0295388	0.0158536	BOK/LRRK2	2
GO:0006110	GO:0006110	regulation of glycolytic process	2/48	45/18723	0.00593934	0.0295388	0.0158536	NUPR1/IGF1	2
GO:0022602	GO:0022602	ovulation cycle process	2/48	45/18723	0.00593934	0.0295388	0.0158536	ESR1/MAP2K6	2
GO:0031670	GO:0031670	cellular response to nutrient	2/48	45/18723	0.00593934	0.0295388	0.0158536	HMOX1/XBP1	2
GO:0035987	GO:0035987	endodermal cell differentiation	2/48	45/18723	0.00593934	0.0295388	0.0158536	COL7A1/FN1	2
GO:0044088	GO:0044088	regulation of vacuole organization	2/48	45/18723	0.00593934	0.0295388	0.0158536	LRRK2/NUPR1	2
GO:0060421	GO:0060421	positive regulation of heart growth	2/48	45/18723	0.00593934	0.0295388	0.0158536	CDK1/IGF1	2
GO:0071354	GO:0071354	cellular response to interleukin-6	2/48	45/18723	0.00593934	0.0295388	0.0158536	PTGIS/IL6	2
GO:1904646	GO:1904646	cellular response to amyloid-beta	2/48	45/18723	0.00593934	0.0295388	0.0158536	VCAM1/IGF1	2
GO:0015850	GO:0015850	organic hydroxy compound transport	4/48	284/18723	0.00597229	0.0296404	0.0159081	SNCA/AQP11/APOA1/APOE	4
GO:0010821	GO:0010821	regulation of mitochondrion organization	3/48	144/18723	0.00598415	0.0296404	0.0159081	BOK/LRRK2/IGF1	3
GO:0035094	GO:0035094	response to nicotine	2/48	46/18723	0.00619921	0.0304575	0.0163467	VCAM1/HMOX1	2
GO:0043462	GO:0043462	regulation of ATPase activity	2/48	46/18723	0.00619921	0.0304575	0.0163467	PLN/DNAJC10	2
GO:0055010	GO:0055010	ventricular cardiac muscle tissue morphogenesis	2/48	46/18723	0.00619921	0.0304575	0.0163467	RYR2/DSP	2
GO:0071827	GO:0071827	plasma lipoprotein particle organization	2/48	46/18723	0.00619921	0.0304575	0.0163467	APOA1/APOE	2
GO:0010675	GO:0010675	regulation of cellular carbohydrate metabolic process	3/48	146/18723	0.00621656	0.0304812	0.0163594	SNCA/NUPR1/IGF1	3
GO:0001889	GO:0001889	liver development	3/48	147/18723	0.00633476	0.030936	0.0166035	HMOX1/XBP1/IL6	3
GO:1902652	GO:1902652	secondary alcohol metabolic process	3/48	147/18723	0.00633476	0.030936	0.0166035	APOA1/HMGCR/APOE	3
GO:0009410	GO:0009410	response to xenobiotic stimulus	5/48	462/18723	0.00640625	0.0309467	0.0166092	SNCA/APOA1/HMOX1/CDK1/MAP2K6	5
GO:0044403	GO:0044403	biological process involved in symbiotic interaction	4/48	290/18723	0.00642396	0.0309467	0.0166092	CDK1/FN1/APOE/CXCL8	4
GO:0050905	GO:0050905	neuromuscular process	3/48	148/18723	0.00645431	0.0309467	0.0166092	ITPR1/DMD/COMP	3
GO:1903900	GO:1903900	regulation of viral life cycle	3/48	148/18723	0.00645431	0.0309467	0.0166092	RSAD2/MX1/CXCL8	3
GO:2001056	GO:2001056	positive regulation of cysteine-type endopeptidase activity	3/48	148/18723	0.00645431	0.0309467	0.0166092	SNCA/BOK/MAP3K5	3
GO:0023061	GO:0023061	signal release	5/48	463/18723	0.00646388	0.0309467	0.0166092	SNCA/LRRK2/MAP2K6/HMGCR/IL6	5
GO:0043618	GO:0043618	regulation of transcription from RNA polymerase II promoter in response to stress	2/48	47/18723	0.0064642	0.0309467	0.0166092	HMOX1/MUC1	2
GO:0048483	GO:0048483	autonomic nervous system development	2/48	47/18723	0.0064642	0.0309467	0.0166092	VCAM1/FN1	2
GO:0090279	GO:0090279	regulation of calcium ion import	2/48	47/18723	0.0064642	0.0309467	0.0166092	PLN/CCL2	2
GO:0097300	GO:0097300	programmed necrotic cell death	2/48	47/18723	0.0064642	0.0309467	0.0166092	BOK/NUPR1	2
GO:0032368	GO:0032368	regulation of lipid transport	3/48	149/18723	0.0065752	0.0314163	0.0168612	APOA1/MAP2K6/APOE	3
GO:0061008	GO:0061008	hepaticobiliary system development	3/48	150/18723	0.00669744	0.0318015	0.017068	HMOX1/XBP1/IL6	3
GO:0070665	GO:0070665	positive regulation of leukocyte proliferation	3/48	150/18723	0.00669744	0.0318015	0.017068	VCAM1/IGF1/IL6	3
GO:0001819	GO:0001819	positive regulation of cytokine production	5/48	467/18723	0.00669808	0.0318015	0.017068	HMOX1/LRRK2/RSAD2/XBP1/IL6	5
GO:0002686	GO:0002686	negative regulation of leukocyte migration	2/48	48/18723	0.00673429	0.0318015	0.017068	HMOX1/CCL2	2
GO:0120009	GO:0120009	intermembrane lipid transfer	2/48	48/18723	0.00673429	0.0318015	0.017068	APOA1/APOE	2
GO:1902003	GO:1902003	regulation of amyloid-beta formation	2/48	48/18723	0.00673429	0.0318015	0.017068	APOE/IGF1	2
GO:0071456	GO:0071456	cellular response to hypoxia	3/48	151/18723	0.00682103	0.0321487	0.0172543	PTGIS/HMOX1/NDRG1	3
GO:0016125	GO:0016125	sterol metabolic process	3/48	152/18723	0.00694597	0.0323472	0.0173608	APOA1/HMGCR/APOE	3
GO:0031056	GO:0031056	regulation of histone modification	3/48	152/18723	0.00694597	0.0323472	0.0173608	SNCA/LRRK2/MUC1	3
GO:0019221	GO:0019221	cytokine-mediated signaling pathway	5/48	472/18723	0.00699916	0.0323472	0.0173608	APOA1/CCL2/MX1/IL6/CXCL8	5
GO:0010823	GO:0010823	negative regulation of mitochondrion organization	2/48	49/18723	0.00700944	0.0323472	0.0173608	BOK/IGF1	2
GO:0018198	GO:0018198	peptidyl-cysteine modification	2/48	49/18723	0.00700944	0.0323472	0.0173608	DMD/TXN	2
GO:0032692	GO:0032692	negative regulation of interleukin-1 production	2/48	49/18723	0.00700944	0.0323472	0.0173608	APOA1/IGF1	2
GO:0043457	GO:0043457	regulation of cellular respiration	2/48	49/18723	0.00700944	0.0323472	0.0173608	SNCA/NUPR1	2
GO:0048168	GO:0048168	regulation of neuronal synaptic plasticity	2/48	49/18723	0.00700944	0.0323472	0.0173608	SNCA/APOE	2
GO:0060964	GO:0060964	regulation of gene silencing by miRNA	2/48	49/18723	0.00700944	0.0323472	0.0173608	ESR1/IL6	2
GO:0070741	GO:0070741	response to interleukin-6	2/48	49/18723	0.00700944	0.0323472	0.0173608	PTGIS/IL6	2
GO:1904707	GO:1904707	positive regulation of vascular associated smooth muscle cell proliferation	2/48	49/18723	0.00700944	0.0323472	0.0173608	MAP3K5/IGF1	2
GO:0031647	GO:0031647	regulation of protein stability	4/48	298/18723	0.00706085	0.0325227	0.017455	SNCA/APOA1/LRRK2/IGF1	4
GO:0002639	GO:0002639	positive regulation of immunoglobulin production	2/48	50/18723	0.00728963	0.0331992	0.0178181	XBP1/IL6	2
GO:0060688	GO:0060688	regulation of morphogenesis of a branching structure	2/48	50/18723	0.00728963	0.0331992	0.0178181	ESR1/LRRK2	2
GO:0071825	GO:0071825	protein-lipid complex subunit organization	2/48	50/18723	0.00728963	0.0331992	0.0178181	APOA1/APOE	2
GO:1900047	GO:1900047	negative regulation of hemostasis	2/48	50/18723	0.00728963	0.0331992	0.0178181	COMP/APOE	2
GO:1902930	GO:1902930	regulation of alcohol biosynthetic process	2/48	50/18723	0.00728963	0.0331992	0.0178181	SNCA/APOE	2
GO:1904036	GO:1904036	negative regulation of epithelial cell apoptotic process	2/48	50/18723	0.00728963	0.0331992	0.0178181	HMOX1/NUPR1	2
GO:0007519	GO:0007519	skeletal muscle tissue development	3/48	155/18723	0.00732898	0.0332539	0.0178475	DMD/NUPR1/HMGCR	3
GO:1903364	GO:1903364	positive regulation of cellular protein catabolic process	3/48	155/18723	0.00732898	0.0332539	0.0178475	LRRK2/NUPR1/APOE	3
GO:0009267	GO:0009267	cellular response to starvation	3/48	156/18723	0.00745938	0.0336572	0.0180639	LRRK2/XBP1/MAP3K5	3
GO:0035051	GO:0035051	cardiocyte differentiation	3/48	156/18723	0.00745938	0.0336572	0.0180639	VCAM1/CDK1/IGF1	3
GO:0046631	GO:0046631	alpha-beta T cell activation	3/48	156/18723	0.00745938	0.0336572	0.0180639	RSAD2/HLA-DRA/IL6	3
GO:0010874	GO:0010874	regulation of cholesterol efflux	2/48	51/18723	0.00757484	0.0340518	0.0182757	APOA1/APOE	2
GO:0045104	GO:0045104	intermediate filament cytoskeleton organization	2/48	51/18723	0.00757484	0.0340518	0.0182757	DSP/DES	2
GO:0007030	GO:0007030	Golgi organization	3/48	157/18723	0.00759116	0.0340622	0.0182813	STX18/LRRK2/CDK1	3
GO:0035966	GO:0035966	response to topologically incorrect protein	3/48	159/18723	0.00785884	0.0350325	0.0188021	BOK/XBP1/COMP	3
GO:0035196	GO:0035196	production of miRNAs involved in gene silencing by miRNA	2/48	52/18723	0.00786503	0.0350325	0.0188021	ESR1/IL6	2
GO:0045103	GO:0045103	intermediate filament-based process	2/48	52/18723	0.00786503	0.0350325	0.0188021	DSP/DES	2
GO:0060147	GO:0060147	regulation of posttranscriptional gene silencing	2/48	52/18723	0.00786503	0.0350325	0.0188021	ESR1/IL6	2
GO:0035637	GO:0035637	multicellular organismal signaling	3/48	160/18723	0.00799476	0.0355453	0.0190773	RYR2/DSP/PLN	3
GO:0051047	GO:0051047	positive regulation of secretion	4/48	310/18723	0.00809266	0.0357578	0.0191913	SNCA/MAP2K6/XBP1/IGF1	4
GO:0060326	GO:0060326	cell chemotaxis	4/48	310/18723	0.00809266	0.0357578	0.0191913	VCAM1/CCL2/IL6/CXCL8	4
GO:0036294	GO:0036294	cellular response to decreased oxygen levels	3/48	161/18723	0.00813207	0.0357578	0.0191913	PTGIS/HMOX1/NDRG1	3
GO:0043620	GO:0043620	regulation of DNA-templated transcription in response to stress	2/48	53/18723	0.00816019	0.0357578	0.0191913	HMOX1/MUC1	2
GO:0045744	GO:0045744	negative regulation of G protein-coupled receptor signaling pathway	2/48	53/18723	0.00816019	0.0357578	0.0191913	SNCA/CXCL8	2
GO:0060966	GO:0060966	regulation of gene silencing by RNA	2/48	53/18723	0.00816019	0.0357578	0.0191913	ESR1/IL6	2
GO:0097479	GO:0097479	synaptic vesicle localization	2/48	53/18723	0.00816019	0.0357578	0.0191913	SNCA/LRRK2	2
GO:1903202	GO:1903202	negative regulation of oxidative stress-induced cell death	2/48	53/18723	0.00816019	0.0357578	0.0191913	LRRK2/TXN	2
GO:0034765	GO:0034765	regulation of ion transmembrane transport	5/48	491/18723	0.00823033	0.0360003	0.0193215	RYR2/SNCA/PLN/CCL2/DMD	5
GO:0051100	GO:0051100	negative regulation of binding	3/48	162/18723	0.00827076	0.0361122	0.0193815	PLN/HMOX1/LRRK2	3
GO:0006633	GO:0006633	fatty acid biosynthetic process	3/48	163/18723	0.00841085	0.0364812	0.0195796	PTGIS/APOA1/XBP1	3
GO:0071322	GO:0071322	cellular response to carbohydrate stimulus	3/48	163/18723	0.00841085	0.0364812	0.0195796	MAP2K6/XBP1/HMGCR	3
GO:0001706	GO:0001706	endoderm formation	2/48	54/18723	0.00846028	0.0364812	0.0195796	COL7A1/FN1	2
GO:0031050	GO:0031050	dsRNA processing	2/48	54/18723	0.00846028	0.0364812	0.0195796	ESR1/IL6	2
GO:0035065	GO:0035065	regulation of histone acetylation	2/48	54/18723	0.00846028	0.0364812	0.0195796	SNCA/MUC1	2
GO:0070918	GO:0070918	production of small RNA involved in gene silencing by RNA	2/48	54/18723	0.00846028	0.0364812	0.0195796	ESR1/IL6	2
GO:0086002	GO:0086002	cardiac muscle cell action potential involved in contraction	2/48	54/18723	0.00846028	0.0364812	0.0195796	RYR2/DSP	2
GO:0050792	GO:0050792	regulation of viral process	3/48	164/18723	0.00855233	0.0367478	0.0197227	RSAD2/MX1/CXCL8	3
GO:0050806	GO:0050806	positive regulation of synaptic transmission	3/48	164/18723	0.00855233	0.0367478	0.0197227	SNCA/CCL2/APOE	3
GO:0046661	GO:0046661	male sex differentiation	3/48	165/18723	0.00869521	0.0372027	0.0199668	ESR1/BOK/NUPR1	3
GO:0006959	GO:0006959	humoral immune response	4/48	317/18723	0.00873816	0.0372027	0.0199668	CCL2/C1R/IL6/CXCL8	4
GO:0003229	GO:0003229	ventricular cardiac muscle tissue development	2/48	55/18723	0.00876528	0.0372027	0.0199668	RYR2/DSP	2
GO:0010676	GO:0010676	positive regulation of cellular carbohydrate metabolic process	2/48	55/18723	0.00876528	0.0372027	0.0199668	SNCA/IGF1	2
GO:0048016	GO:0048016	inositol phosphate-mediated signaling	2/48	55/18723	0.00876528	0.0372027	0.0199668	ITPR1/IGF1	2
GO:0098900	GO:0098900	regulation of action potential	2/48	55/18723	0.00876528	0.0372027	0.0199668	RYR2/DSP	2
GO:1902991	GO:1902991	regulation of amyloid precursor protein catabolic process	2/48	55/18723	0.00876528	0.0372027	0.0199668	APOE/IGF1	2
GO:0015980	GO:0015980	energy derivation by oxidation of organic compounds	4/48	318/18723	0.00883305	0.0373223	0.020031	SNCA/CDK1/NUPR1/IGF1	4
GO:0043112	GO:0043112	receptor metabolic process	3/48	166/18723	0.0088395	0.0373223	0.020031	SNCA/APOE/CXCL8	3
GO:0060538	GO:0060538	skeletal muscle organ development	3/48	166/18723	0.0088395	0.0373223	0.020031	DMD/NUPR1/HMGCR	3
GO:1903034	GO:1903034	regulation of response to wounding	3/48	167/18723	0.00898519	0.037836	0.0203067	XBP1/HMGCR/APOE	3
GO:0016042	GO:0016042	lipid catabolic process	4/48	320/18723	0.00902485	0.037836	0.0203067	HSD11B1/APOA1/APOE/GLA	4
GO:0043388	GO:0043388	positive regulation of DNA binding	2/48	56/18723	0.00907516	0.037836	0.0203067	TXN/IGF1	2
GO:0043470	GO:0043470	regulation of carbohydrate catabolic process	2/48	56/18723	0.00907516	0.037836	0.0203067	NUPR1/IGF1	2
GO:0045071	GO:0045071	negative regulation of viral genome replication	2/48	56/18723	0.00907516	0.037836	0.0203067	RSAD2/MX1	2
GO:0046622	GO:0046622	positive regulation of organ growth	2/48	56/18723	0.00907516	0.037836	0.0203067	CDK1/IGF1	2
GO:1904645	GO:1904645	response to amyloid-beta	2/48	56/18723	0.00907516	0.037836	0.0203067	VCAM1/IGF1	2
GO:0002706	GO:0002706	regulation of lymphocyte mediated immunity	3/48	168/18723	0.00913229	0.037836	0.0203067	RSAD2/HLA-DRA/IL6	3
GO:0002822	GO:0002822	regulation of adaptive immune response based on somatic recombination of immune receptors built from immunoglobulin superfamily domains	3/48	168/18723	0.00913229	0.037836	0.0203067	RSAD2/HLA-DRA/IL6	3
GO:0099173	GO:0099173	postsynapse organization	3/48	168/18723	0.00913229	0.037836	0.0203067	LRRK2/NDRG1/APOE	3
GO:2000241	GO:2000241	regulation of reproductive process	3/48	168/18723	0.00913229	0.037836	0.0203067	ESR1/NUPR1/IGF1	3
GO:0034205	GO:0034205	amyloid-beta formation	2/48	57/18723	0.0093899	0.0387712	0.0208086	APOE/IGF1	2
GO:0061756	GO:0061756	leukocyte adhesion to vascular endothelial cell	2/48	57/18723	0.0093899	0.0387712	0.0208086	VCAM1/IL6	2
GO:0007259	GO:0007259	receptor signaling pathway via JAK-STAT	3/48	170/18723	0.00943072	0.0388738	0.0208637	CCL2/IGF1/IL6	3
GO:0042129	GO:0042129	regulation of T cell proliferation	3/48	171/18723	0.00958207	0.0394308	0.0211626	VCAM1/IGF1/IL6	3
GO:0002931	GO:0002931	response to ischemia	2/48	58/18723	0.00970947	0.0397233	0.0213196	MAP2K6/MAP3K5	2
GO:0010043	GO:0010043	response to zinc ion	2/48	58/18723	0.00970947	0.0397233	0.0213196	VCAM1/PLN	2
GO:0086065	GO:0086065	cell communication involved in cardiac conduction	2/48	58/18723	0.00970947	0.0397233	0.0213196	RYR2/DSP	2
GO:0002221	GO:0002221	pattern recognition receptor signaling pathway	3/48	172/18723	0.00973483	0.0397233	0.0213196	ESR1/RSAD2/MAP2K6	3
GO:0042770	GO:0042770	signal transduction in response to DNA damage	3/48	172/18723	0.00973483	0.0397233	0.0213196	CDK1/MUC1/NDRG1	3
GO:0006694	GO:0006694	steroid biosynthetic process	3/48	173/18723	0.00988901	0.0402849	0.021621	APOA1/HMGCR/APOE	3
GO:0048638	GO:0048638	regulation of developmental growth	4/48	330/18723	0.0100249	0.0405789	0.0217789	CDK1/FN1/APOE/IGF1	4
GO:0001836	GO:0001836	release of cytochrome c from mitochondria	2/48	59/18723	0.0100338	0.0405789	0.0217789	BOK/IGF1	2
GO:0043407	GO:0043407	negative regulation of MAP kinase activity	2/48	59/18723	0.0100338	0.0405789	0.0217789	HMGCR/APOE	2
GO:0051353	GO:0051353	positive regulation of oxidoreductase activity	2/48	59/18723	0.0100338	0.0405789	0.0217789	SNCA/APOE	2
GO:0048639	GO:0048639	positive regulation of developmental growth	3/48	174/18723	0.0100446	0.0405789	0.0217789	CDK1/FN1/IGF1	3
GO:0043534	GO:0043534	blood vessel endothelial cell migration	3/48	176/18723	0.0103601	0.0417265	0.0223948	APOA1/HMOX1/APOE	3
GO:0055008	GO:0055008	cardiac muscle tissue morphogenesis	2/48	60/18723	0.010363	0.0417265	0.0223948	RYR2/DSP	2
GO:0071453	GO:0071453	cellular response to oxygen levels	3/48	177/18723	0.01052	0.0422887	0.0226965	PTGIS/HMOX1/NDRG1	3
GO:0006109	GO:0006109	regulation of carbohydrate metabolic process	3/48	178/18723	0.0106814	0.0428664	0.0230066	SNCA/NUPR1/IGF1	3
GO:0001936	GO:0001936	regulation of endothelial cell proliferation	3/48	179/18723	0.0108441	0.0432343	0.023204	HMOX1/CCL2/APOE	3
GO:0007626	GO:0007626	locomotory behavior	3/48	179/18723	0.0108441	0.0432343	0.023204	SNCA/LRRK2/APOE	3
GO:0010950	GO:0010950	positive regulation of endopeptidase activity	3/48	179/18723	0.0108441	0.0432343	0.023204	SNCA/BOK/MAP3K5	3
GO:1901991	GO:1901991	negative regulation of mitotic cell cycle phase transition	3/48	179/18723	0.0108441	0.0432343	0.023204	CCL2/CDK1/MUC1	3
GO:0045428	GO:0045428	regulation of nitric oxide biosynthetic process	2/48	62/18723	0.0110355	0.0436398	0.0234216	PTGIS/GLA	2
GO:0045576	GO:0045576	mast cell activation	2/48	62/18723	0.0110355	0.0436398	0.0234216	HMOX1/NDRG1	2
GO:0048488	GO:0048488	synaptic vesicle endocytosis	2/48	62/18723	0.0110355	0.0436398	0.0234216	SNCA/LRRK2	2
GO:0070265	GO:0070265	necrotic cell death	2/48	62/18723	0.0110355	0.0436398	0.0234216	BOK/NUPR1	2
GO:0140238	GO:0140238	presynaptic endocytosis	2/48	62/18723	0.0110355	0.0436398	0.0234216	SNCA/LRRK2	2
GO:0008361	GO:0008361	regulation of cell size	3/48	181/18723	0.011174	0.0439017	0.0235622	AQP11/FN1/APOE	3
GO:0032640	GO:0032640	tumor necrosis factor production	3/48	181/18723	0.011174	0.0439017	0.0235622	LRRK2/IGF1/IL6	3
GO:0032680	GO:0032680	regulation of tumor necrosis factor production	3/48	181/18723	0.011174	0.0439017	0.0235622	LRRK2/IGF1/IL6	3
GO:0097696	GO:0097696	receptor signaling pathway via STAT	3/48	181/18723	0.011174	0.0439017	0.0235622	CCL2/IGF1/IL6	3
GO:2000756	GO:2000756	regulation of peptidyl-lysine acetylation	2/48	63/18723	0.0113789	0.0446346	0.0239556	SNCA/MUC1	2
GO:0002819	GO:0002819	regulation of adaptive immune response	3/48	183/18723	0.0115096	0.0450747	0.0241918	RSAD2/HLA-DRA/IL6	3
GO:2001257	GO:2001257	regulation of cation channel activity	3/48	184/18723	0.0116796	0.0456669	0.0245096	PLN/CCL2/DMD	3
GO:0046579	GO:0046579	positive regulation of Ras protein signal transduction	2/48	64/18723	0.0117269	0.0457049	0.02453	APOA1/IGF1	2
GO:0080164	GO:0080164	regulation of nitric oxide metabolic process	2/48	64/18723	0.0117269	0.0457049	0.02453	PTGIS/GLA	2
GO:0007369	GO:0007369	gastrulation	3/48	185/18723	0.0118511	0.0461148	0.02475	APOA1/COL7A1/FN1	3
GO:0071706	GO:0071706	tumor necrosis factor superfamily cytokine production	3/48	186/18723	0.012024	0.0465641	0.0249911	LRRK2/IGF1/IL6	3
GO:1902115	GO:1902115	regulation of organelle assembly	3/48	186/18723	0.012024	0.0465641	0.0249911	STX18/LRRK2/NUPR1	3
GO:1903555	GO:1903555	regulation of tumor necrosis factor superfamily cytokine production	3/48	186/18723	0.012024	0.0465641	0.0249911	LRRK2/IGF1/IL6	3
GO:0002720	GO:0002720	positive regulation of cytokine production involved in immune response	2/48	65/18723	0.0120796	0.046631	0.025027	RSAD2/IL6	2
GO:0072577	GO:0072577	endothelial cell apoptotic process	2/48	65/18723	0.0120796	0.046631	0.025027	CCL2/MAP3K5	2
GO:0002449	GO:0002449	lymphocyte mediated immunity	4/48	350/18723	0.0122358	0.0471592	0.0253105	C1R/RSAD2/HLA-DRA/IL6	4
GO:0042093	GO:0042093	T-helper cell differentiation	2/48	66/18723	0.0124369	0.0477827	0.0256452	HLA-DRA/IL6	2
GO:0050766	GO:0050766	positive regulation of phagocytosis	2/48	66/18723	0.0124369	0.0477827	0.0256452	APOA1/CCL2	2
GO:0009060	GO:0009060	aerobic respiration	3/48	189/18723	0.0125514	0.0480708	0.0257998	SNCA/CDK1/NUPR1	3
GO:0046578	GO:0046578	regulation of Ras protein signal transduction	3/48	189/18723	0.0125514	0.0480708	0.0257998	APOA1/APOE/IGF1	3
GO:0006879	GO:0006879	cellular iron ion homeostasis	2/48	67/18723	0.0127988	0.0487114	0.0261436	HMOX1/CP	2
GO:0010517	GO:0010517	regulation of phospholipase activity	2/48	67/18723	0.0127988	0.0487114	0.0261436	ESR1/SNCA	2
GO:0032890	GO:0032890	regulation of organic acid transport	2/48	67/18723	0.0127988	0.0487114	0.0261436	SNCA/MAP2K6	2
GO:0050435	GO:0050435	amyloid-beta metabolic process	2/48	67/18723	0.0127988	0.0487114	0.0261436	APOE/IGF1	2
GO:0002460	GO:0002460	adaptive immune response based on somatic recombination of immune receptors built from immunoglobulin superfamily domains	4/48	356/18723	0.0129555	0.0492309	0.0264224	C1R/RSAD2/HLA-DRA/IL6	4
GO:0002294	GO:0002294	CD4-positive, alpha-beta T cell differentiation involved in immune response	2/48	68/18723	0.0131652	0.0495633	0.0266008	HLA-DRA/IL6	2
GO:0042531	GO:0042531	positive regulation of tyrosine phosphorylation of STAT protein	2/48	68/18723	0.0131652	0.0495633	0.0266008	IGF1/IL6	2
GO:0042698	GO:0042698	ovulation cycle	2/48	68/18723	0.0131652	0.0495633	0.0266008	ESR1/MAP2K6	2
GO:0042987	GO:0042987	amyloid precursor protein catabolic process	2/48	68/18723	0.0131652	0.0495633	0.0266008	APOE/IGF1	2
GO:0046686	GO:0046686	response to cadmium ion	2/48	68/18723	0.0131652	0.0495633	0.0266008	HMOX1/CDK1	2
GO:1900046	GO:1900046	regulation of hemostasis	2/48	68/18723	0.0131652	0.0495633	0.0266008	COMP/APOE	2
GO:0002285	GO:0002285	lymphocyte activation involved in immune response	3/48	194/18723	0.0134597	0.0504138	0.0270573	XBP1/HLA-DRA/IL6	3
GO:0002287	GO:0002287	alpha-beta T cell activation involved in immune response	2/48	69/18723	0.0135363	0.0504138	0.0270573	HLA-DRA/IL6	2
GO:0002293	GO:0002293	alpha-beta T cell differentiation involved in immune response	2/48	69/18723	0.0135363	0.0504138	0.0270573	HLA-DRA/IL6	2
GO:0033344	GO:0033344	cholesterol efflux	2/48	69/18723	0.0135363	0.0504138	0.0270573	APOA1/APOE	2
GO:0045669	GO:0045669	positive regulation of osteoblast differentiation	2/48	69/18723	0.0135363	0.0504138	0.0270573	IGF1/IL6	2
GO:0051966	GO:0051966	regulation of synaptic transmission, glutamatergic	2/48	69/18723	0.0135363	0.0504138	0.0270573	LRRK2/CCL2	2
GO:0060193	GO:0060193	positive regulation of lipase activity	2/48	69/18723	0.0135363	0.0504138	0.0270573	ESR1/APOA1	2
GO:0002548	GO:0002548	monocyte chemotaxis	2/48	70/18723	0.0139118	0.0515756	0.0276808	CCL2/IL6	2
GO:0045123	GO:0045123	cellular extravasation	2/48	70/18723	0.0139118	0.0515756	0.0276808	VCAM1/CCL2	2
GO:0060415	GO:0060415	muscle tissue morphogenesis	2/48	70/18723	0.0139118	0.0515756	0.0276808	RYR2/DSP	2
GO:0042594	GO:0042594	response to starvation	3/48	197/18723	0.0140223	0.051827	0.0278157	LRRK2/XBP1/MAP3K5	3
GO:0071248	GO:0071248	cellular response to metal ion	3/48	197/18723	0.0140223	0.051827	0.0278157	SNCA/HMOX1/LRRK2	3
GO:0003208	GO:0003208	cardiac ventricle morphogenesis	2/48	71/18723	0.0142919	0.0526635	0.0282647	RYR2/DSP	2
GO:0032722	GO:0032722	positive regulation of chemokine production	2/48	71/18723	0.0142919	0.0526635	0.0282647	HMOX1/IL6	2
GO:0042098	GO:0042098	T cell proliferation	3/48	199/18723	0.0144047	0.0529988	0.0284447	VCAM1/IGF1/IL6	3
GO:0030330	GO:0030330	DNA damage response, signal transduction by p53 class mediator	2/48	72/18723	0.0146764	0.0537547	0.0288503	MUC1/NDRG1	2
GO:0051057	GO:0051057	positive regulation of small GTPase mediated signal transduction	2/48	72/18723	0.0146764	0.0537547	0.0288503	APOA1/IGF1	2
GO:0055021	GO:0055021	regulation of cardiac muscle tissue growth	2/48	72/18723	0.0146764	0.0537547	0.0288503	CDK1/IGF1	2
GO:0006473	GO:0006473	protein acetylation	3/48	201/18723	0.014793	0.0541003	0.0290358	SNCA/MUC1/NUPR1	3
GO:0017157	GO:0017157	regulation of exocytosis	3/48	202/18723	0.0149894	0.0547362	0.0293771	SNCA/HMOX1/LRRK2	3
GO:0002637	GO:0002637	regulation of immunoglobulin production	2/48	73/18723	0.0150654	0.054767	0.0293936	XBP1/IL6	2
GO:0051865	GO:0051865	protein autoubiquitination	2/48	73/18723	0.0150654	0.054767	0.0293936	RNF183/LRRK2	2
GO:1904427	GO:1904427	positive regulation of calcium ion transmembrane transport	2/48	73/18723	0.0150654	0.054767	0.0293936	RYR2/SNCA	2
GO:0030968	GO:0030968	endoplasmic reticulum unfolded protein response	2/48	74/18723	0.0154589	0.0557803	0.0299375	BOK/XBP1	2
GO:0048844	GO:0048844	artery morphogenesis	2/48	74/18723	0.0154589	0.0557803	0.0299375	COMP/APOE	2
GO:0051881	GO:0051881	regulation of mitochondrial membrane potential	2/48	74/18723	0.0154589	0.0557803	0.0299375	BOK/LRRK2	2
GO:0070972	GO:0070972	protein localization to endoplasmic reticulum	2/48	74/18723	0.0154589	0.0557803	0.0299375	RYR2/LRRK2	2
GO:1903201	GO:1903201	regulation of oxidative stress-induced cell death	2/48	74/18723	0.0154589	0.0557803	0.0299375	LRRK2/TXN	2
GO:0060348	GO:0060348	bone development	3/48	205/18723	0.0155875	0.0561612	0.0301419	MAP2K6/COMP/IGF1	3
GO:0017038	GO:0017038	protein import	3/48	206/18723	0.0157898	0.0565447	0.0303477	LRRK2/CDK1/APOE	3
GO:0002292	GO:0002292	T cell differentiation involved in immune response	2/48	75/18723	0.0158567	0.0565447	0.0303477	HLA-DRA/IL6	2
GO:0034121	GO:0034121	regulation of toll-like receptor signaling pathway	2/48	75/18723	0.0158567	0.0565447	0.0303477	ESR1/RSAD2	2
GO:0036465	GO:0036465	synaptic vesicle recycling	2/48	75/18723	0.0158567	0.0565447	0.0303477	SNCA/LRRK2	2
GO:0045913	GO:0045913	positive regulation of carbohydrate metabolic process	2/48	75/18723	0.0158567	0.0565447	0.0303477	SNCA/IGF1	2
GO:0048662	GO:0048662	negative regulation of smooth muscle cell proliferation	2/48	75/18723	0.0158567	0.0565447	0.0303477	HMOX1/APOE	2
GO:0051453	GO:0051453	regulation of intracellular pH	2/48	75/18723	0.0158567	0.0565447	0.0303477	AQP11/LRRK2	2
GO:0050679	GO:0050679	positive regulation of epithelial cell proliferation	3/48	207/18723	0.0159937	0.0569496	0.030565	HMOX1/XBP1/IGF1	3
GO:0001937	GO:0001937	negative regulation of endothelial cell proliferation	2/48	76/18723	0.0162589	0.0576409	0.0309361	CCL2/APOE	2
GO:0006809	GO:0006809	nitric oxide biosynthetic process	2/48	76/18723	0.0162589	0.0576409	0.0309361	PTGIS/GLA	2
GO:0045685	GO:0045685	regulation of glial cell differentiation	2/48	76/18723	0.0162589	0.0576409	0.0309361	CDK1/IL6	2
GO:0043281	GO:0043281	regulation of cysteine-type endopeptidase activity involved in apoptotic process	3/48	209/18723	0.0164058	0.0580768	0.03117	SNCA/BOK/MAP3K5	3
GO:0007492	GO:0007492	endoderm development	2/48	77/18723	0.0166655	0.0587397	0.0315258	COL7A1/FN1	2
GO:0048644	GO:0048644	muscle organ morphogenesis	2/48	77/18723	0.0166655	0.0587397	0.0315258	RYR2/DSP	2
GO:1901983	GO:1901983	regulation of protein acetylation	2/48	77/18723	0.0166655	0.0587397	0.0315258	SNCA/MUC1	2
GO:0045786	GO:0045786	negative regulation of cell cycle	4/48	385/18723	0.0168158	0.0588712	0.0315964	CCL2/CDK1/MUC1/NUPR1	4
GO:0030100	GO:0030100	regulation of endocytosis	3/48	211/18723	0.0168238	0.0588712	0.0315964	SNCA/LRRK2/APOE	3
GO:0042180	GO:0042180	cellular ketone metabolic process	3/48	211/18723	0.0168238	0.0588712	0.0315964	SNCA/APOA1/HMGCR	3
GO:0043491	GO:0043491	protein kinase B signaling	3/48	211/18723	0.0168238	0.0588712	0.0315964	CCL2/TXN/IGF1	3
GO:0050807	GO:0050807	regulation of synapse organization	3/48	211/18723	0.0168238	0.0588712	0.0315964	SNCA/LRRK2/APOE	3
GO:0006469	GO:0006469	negative regulation of protein kinase activity	3/48	212/18723	0.0170351	0.0593282	0.0318416	SNCA/HMGCR/APOE	3
GO:0006919	GO:0006919	activation of cysteine-type endopeptidase activity involved in apoptotic process	2/48	78/18723	0.0170764	0.0593282	0.0318416	SNCA/BOK	2
GO:0032371	GO:0032371	regulation of sterol transport	2/48	78/18723	0.0170764	0.0593282	0.0318416	APOA1/APOE	2
GO:0032374	GO:0032374	regulation of cholesterol transport	2/48	78/18723	0.0170764	0.0593282	0.0318416	APOA1/APOE	2
GO:0061045	GO:0061045	negative regulation of wound healing	2/48	78/18723	0.0170764	0.0593282	0.0318416	HMGCR/APOE	2
GO:0000082	GO:0000082	G1/S transition of mitotic cell cycle	3/48	214/18723	0.0174621	0.0604254	0.0324306	CCL2/MUC1/CDKN3	3
GO:0072330	GO:0072330	monocarboxylic acid biosynthetic process	3/48	214/18723	0.0174621	0.0604254	0.0324306	PTGIS/APOA1/XBP1	3
GO:0014068	GO:0014068	positive regulation of phosphatidylinositol 3-kinase signaling	2/48	79/18723	0.0174916	0.0604254	0.0324306	FN1/IGF1	2
GO:0060420	GO:0060420	regulation of heart growth	2/48	79/18723	0.0174916	0.0604254	0.0324306	CDK1/IGF1	2
GO:0006631	GO:0006631	fatty acid metabolic process	4/48	390/18723	0.017547	0.0605308	0.0324871	PTGIS/SNCA/APOA1/XBP1	4
GO:0002377	GO:0002377	immunoglobulin production	3/48	216/18723	0.0178951	0.0616121	0.0330674	XBP1/HLA-DRA/IL6	3
GO:0007422	GO:0007422	peripheral nervous system development	2/48	80/18723	0.0179111	0.0616121	0.0330674	CDK1/NDRG1	2
GO:0050803	GO:0050803	regulation of synapse structure or activity	3/48	218/18723	0.0183341	0.0624514	0.0335179	SNCA/LRRK2/APOE	3
GO:0001960	GO:0001960	negative regulation of cytokine-mediated signaling pathway	2/48	81/18723	0.0183348	0.0624514	0.0335179	APOA1/IL6	2
GO:0006096	GO:0006096	glycolytic process	2/48	81/18723	0.0183348	0.0624514	0.0335179	NUPR1/IGF1	2
GO:0030641	GO:0030641	regulation of cellular pH	2/48	81/18723	0.0183348	0.0624514	0.0335179	AQP11/LRRK2	2
GO:0044773	GO:0044773	mitotic DNA damage checkpoint signaling	2/48	81/18723	0.0183348	0.0624514	0.0335179	CDK1/MUC1	2
GO:0046209	GO:0046209	nitric oxide metabolic process	2/48	81/18723	0.0183348	0.0624514	0.0335179	PTGIS/GLA	2
GO:0060968	GO:0060968	regulation of gene silencing	2/48	81/18723	0.0183348	0.0624514	0.0335179	ESR1/IL6	2
GO:0097191	GO:0097191	extrinsic apoptotic signaling pathway	3/48	219/18723	0.0185558	0.0631158	0.0338745	BOK/HMOX1/IGF1	3
GO:0032970	GO:0032970	regulation of actin filament-based process	4/48	397/18723	0.0186037	0.0631902	0.0339144	RYR2/APOA1/DSP/PLN	4
GO:0002312	GO:0002312	B cell activation involved in immune response	2/48	82/18723	0.0187628	0.0633435	0.0339967	XBP1/IL6	2
GO:0006757	GO:0006757	ATP generation from ADP	2/48	82/18723	0.0187628	0.0633435	0.0339967	NUPR1/IGF1	2
GO:0046889	GO:0046889	positive regulation of lipid biosynthetic process	2/48	82/18723	0.0187628	0.0633435	0.0339967	APOA1/APOE	2
GO:2001057	GO:2001057	reactive nitrogen species metabolic process	2/48	82/18723	0.0187628	0.0633435	0.0339967	PTGIS/GLA	2
GO:0097529	GO:0097529	myeloid leukocyte migration	3/48	220/18723	0.0187791	0.0633435	0.0339967	CCL2/IL6/CXCL8	3
GO:0008406	GO:0008406	gonad development	3/48	221/18723	0.0190038	0.0640128	0.0343559	ESR1/BOK/NUPR1	3
GO:0048678	GO:0048678	response to axon injury	2/48	83/18723	0.019195	0.0644784	0.0346058	APOA1/CDK1	2
GO:0051899	GO:0051899	membrane depolarization	2/48	83/18723	0.019195	0.0644784	0.0346058	BOK/LRRK2	2
GO:0050920	GO:0050920	regulation of chemotaxis	3/48	223/18723	0.0194578	0.0652708	0.0350311	CCL2/IL6/CXCL8	3
GO:0042310	GO:0042310	vasoconstriction	2/48	84/18723	0.0196314	0.065492	0.0351498	HMGCR/COMP	2
GO:0045445	GO:0045445	myoblast differentiation	2/48	84/18723	0.0196314	0.065492	0.0351498	HMGCR/IGF1	2
GO:0097061	GO:0097061	dendritic spine organization	2/48	84/18723	0.0196314	0.065492	0.0351498	LRRK2/APOE	2
GO:2000134	GO:2000134	negative regulation of G1/S transition of mitotic cell cycle	2/48	84/18723	0.0196314	0.065492	0.0351498	CCL2/MUC1	2
GO:0016485	GO:0016485	protein processing	3/48	225/18723	0.0199178	0.0662349	0.0355485	LRRK2/C1R/COMP	3
GO:0050670	GO:0050670	regulation of lymphocyte proliferation	3/48	225/18723	0.0199178	0.0662349	0.0355485	VCAM1/IGF1/IL6	3
GO:0030433	GO:0030433	ubiquitin-dependent ERAD pathway	2/48	85/18723	0.020072	0.0662349	0.0355485	UBXN8/DNAJC10	2
GO:0032092	GO:0032092	positive regulation of protein binding	2/48	85/18723	0.020072	0.0662349	0.0355485	LRRK2/APOE	2
GO:0042509	GO:0042509	regulation of tyrosine phosphorylation of STAT protein	2/48	85/18723	0.020072	0.0662349	0.0355485	IGF1/IL6	2
GO:0044774	GO:0044774	mitotic DNA integrity checkpoint signaling	2/48	85/18723	0.020072	0.0662349	0.0355485	CDK1/MUC1	2
GO:0055013	GO:0055013	cardiac muscle cell development	2/48	85/18723	0.020072	0.0662349	0.0355485	CDK1/IGF1	2
GO:0055072	GO:0055072	iron ion homeostasis	2/48	85/18723	0.020072	0.0662349	0.0355485	HMOX1/CP	2
GO:0071241	GO:0071241	cellular response to inorganic substance	3/48	226/18723	0.02015	0.0664023	0.0356384	SNCA/HMOX1/LRRK2	3
GO:0001503	GO:0001503	ossification	4/48	408/18723	0.0203432	0.0669007	0.0359058	MAP2K6/COMP/IGF1/IL6	4
GO:0032944	GO:0032944	regulation of mononuclear cell proliferation	3/48	227/18723	0.0203838	0.0669007	0.0359058	VCAM1/IGF1/IL6	3
GO:0045137	GO:0045137	development of primary sexual characteristics	3/48	227/18723	0.0203838	0.0669007	0.0359058	ESR1/BOK/NUPR1	3
GO:0015908	GO:0015908	fatty acid transport	2/48	86/18723	0.0205167	0.0669754	0.0359459	MAP2K6/APOE	2
GO:0035023	GO:0035023	regulation of Rho protein signal transduction	2/48	86/18723	0.0205167	0.0669754	0.0359459	APOA1/APOE	2
GO:0046928	GO:0046928	regulation of neurotransmitter secretion	2/48	86/18723	0.0205167	0.0669754	0.0359459	SNCA/LRRK2	2
GO:0060761	GO:0060761	negative regulation of response to cytokine stimulus	2/48	86/18723	0.0205167	0.0669754	0.0359459	APOA1/IL6	2
GO:0001649	GO:0001649	osteoblast differentiation	3/48	229/18723	0.0208558	0.0679001	0.0364422	MAP2K6/IGF1/IL6	3
GO:0033157	GO:0033157	regulation of intracellular protein transport	3/48	229/18723	0.0208558	0.0679001	0.0364422	LRRK2/CDK1/TXN	3
GO:0007029	GO:0007029	endoplasmic reticulum organization	2/48	87/18723	0.0209656	0.0680751	0.0365362	STX18/LRRK2	2
GO:0044070	GO:0044070	regulation of anion transport	2/48	87/18723	0.0209656	0.0680751	0.0365362	SNCA/MAP2K6	2
GO:0030595	GO:0030595	leukocyte chemotaxis	3/48	230/18723	0.0210941	0.0682192	0.0366135	CCL2/IL6/CXCL8	3
GO:0045055	GO:0045055	regulated exocytosis	3/48	230/18723	0.0210941	0.0682192	0.0366135	SNCA/HMOX1/LRRK2	3
GO:0045333	GO:0045333	cellular respiration	3/48	230/18723	0.0210941	0.0682192	0.0366135	SNCA/CDK1/NUPR1	3
GO:0045732	GO:0045732	positive regulation of protein catabolic process	3/48	231/18723	0.0213339	0.068903	0.0369805	LRRK2/NUPR1/APOE	3
GO:0007260	GO:0007260	tyrosine phosphorylation of STAT protein	2/48	88/18723	0.0214185	0.0689931	0.0370288	IGF1/IL6	2
GO:0070098	GO:0070098	chemokine-mediated signaling pathway	2/48	88/18723	0.0214185	0.0689931	0.0370288	CCL2/CXCL8	2
GO:1900407	GO:1900407	regulation of cellular response to oxidative stress	2/48	89/18723	0.0218755	0.070372	0.0377689	LRRK2/TXN	2
GO:0048588	GO:0048588	developmental cell growth	3/48	234/18723	0.0220622	0.0707854	0.0379908	FN1/APOE/IGF1	3
GO:0060560	GO:0060560	developmental growth involved in morphogenesis	3/48	234/18723	0.0220622	0.0707854	0.0379908	ESR1/FN1/APOE	3
GO:0045930	GO:0045930	negative regulation of mitotic cell cycle	3/48	235/18723	0.022308	0.0712894	0.0382613	CCL2/CDK1/MUC1	3
GO:2000116	GO:2000116	regulation of cysteine-type endopeptidase activity	3/48	235/18723	0.022308	0.0712894	0.0382613	SNCA/BOK/MAP3K5	3
GO:0046031	GO:0046031	ADP metabolic process	2/48	90/18723	0.0223366	0.0712894	0.0382613	NUPR1/IGF1	2
GO:0099175	GO:0099175	regulation of postsynapse organization	2/48	90/18723	0.0223366	0.0712894	0.0382613	LRRK2/APOE	2
GO:0006885	GO:0006885	regulation of pH	2/48	91/18723	0.0228017	0.0724016	0.0388582	AQP11/LRRK2	2
GO:0045582	GO:0045582	positive regulation of T cell differentiation	2/48	91/18723	0.0228017	0.0724016	0.0388582	XBP1/HLA-DRA	2
GO:0055006	GO:0055006	cardiac cell development	2/48	91/18723	0.0228017	0.0724016	0.0388582	CDK1/IGF1	2
GO:0033673	GO:0033673	negative regulation of kinase activity	3/48	237/18723	0.0228041	0.0724016	0.0388582	SNCA/HMGCR/APOE	3
GO:0044772	GO:0044772	mitotic cell cycle phase transition	4/48	424/18723	0.0230485	0.0730057	0.0391824	CCL2/CDK1/MUC1/CDKN3	4
GO:0051259	GO:0051259	protein complex oligomerization	3/48	238/18723	0.0230544	0.0730057	0.0391824	SNCA/AQP11/BOK	3
GO:0031058	GO:0031058	positive regulation of histone modification	2/48	92/18723	0.0232708	0.0732141	0.0392943	LRRK2/MUC1	2
GO:0034502	GO:0034502	protein localization to chromosome	2/48	92/18723	0.0232708	0.0732141	0.0392943	ESR1/CDK1	2
GO:0035249	GO:0035249	synaptic transmission, glutamatergic	2/48	92/18723	0.0232708	0.0732141	0.0392943	LRRK2/CCL2	2
GO:0048525	GO:0048525	negative regulation of viral process	2/48	92/18723	0.0232708	0.0732141	0.0392943	RSAD2/MX1	2
GO:0070509	GO:0070509	calcium ion import	2/48	92/18723	0.0232708	0.0732141	0.0392943	PLN/CCL2	2
GO:0050808	GO:0050808	synapse organization	4/48	426/18723	0.0234015	0.0735302	0.0394639	SNCA/LRRK2/NDRG1/APOE	4
GO:0019217	GO:0019217	regulation of fatty acid metabolic process	2/48	93/18723	0.0237438	0.0740321	0.0397333	SNCA/APOA1	2
GO:0032755	GO:0032755	positive regulation of interleukin-6 production	2/48	93/18723	0.0237438	0.0740321	0.0397333	XBP1/IL6	2
GO:0090398	GO:0090398	cellular senescence	2/48	93/18723	0.0237438	0.0740321	0.0397333	MAP2K6/MAP3K5	2
GO:0106027	GO:0106027	neuron projection organization	2/48	93/18723	0.0237438	0.0740321	0.0397333	LRRK2/APOE	2
GO:1901796	GO:1901796	regulation of signal transduction by p53 class mediator	2/48	93/18723	0.0237438	0.0740321	0.0397333	MAP2K6/MUC1	2
GO:1902807	GO:1902807	negative regulation of cell cycle G1/S phase transition	2/48	93/18723	0.0237438	0.0740321	0.0397333	CCL2/MUC1	2
GO:0044843	GO:0044843	cell cycle G1/S phase transition	3/48	241/18723	0.0238144	0.0741571	0.0398004	CCL2/MUC1/CDKN3	3
GO:0002690	GO:0002690	positive regulation of leukocyte chemotaxis	2/48	94/18723	0.0242209	0.0744556	0.0399606	IL6/CXCL8	2
GO:0051702	GO:0051702	biological process involved in interaction with symbiont	2/48	94/18723	0.0242209	0.0744556	0.0399606	FN1/APOE	2
GO:1903035	GO:1903035	negative regulation of response to wounding	2/48	94/18723	0.0242209	0.0744556	0.0399606	HMGCR/APOE	2
GO:0043543	GO:0043543	protein acylation	3/48	243/18723	0.0243286	0.0744556	0.0399606	SNCA/MUC1/NUPR1	3
GO:0006898	GO:0006898	receptor-mediated endocytosis	3/48	244/18723	0.024588	0.0744556	0.0399606	SNCA/APOE/CXCL8	3
GO:0008585	GO:0008585	female gonad development	2/48	95/18723	0.0247019	0.0744556	0.0399606	ESR1/NUPR1	2
GO:0030516	GO:0030516	regulation of axon extension	2/48	95/18723	0.0247019	0.0744556	0.0399606	FN1/APOE	2
GO:0042773	GO:0042773	ATP synthesis coupled electron transport	2/48	95/18723	0.0247019	0.0744556	0.0399606	SNCA/CDK1	2
GO:0042775	GO:0042775	mitochondrial ATP synthesis coupled electron transport	2/48	95/18723	0.0247019	0.0744556	0.0399606	SNCA/CDK1	2
GO:0042982	GO:0042982	amyloid precursor protein metabolic process	2/48	95/18723	0.0247019	0.0744556	0.0399606	APOE/IGF1	2
GO:0050764	GO:0050764	regulation of phagocytosis	2/48	95/18723	0.0247019	0.0744556	0.0399606	APOA1/CCL2	2
GO:0070663	GO:0070663	regulation of leukocyte proliferation	3/48	245/18723	0.0248489	0.0744556	0.0399606	VCAM1/IGF1/IL6	3
GO:0015914	GO:0015914	phospholipid transport	2/48	96/18723	0.0251868	0.0744556	0.0399606	APOA1/APOE	2
GO:0034620	GO:0034620	cellular response to unfolded protein	2/48	96/18723	0.0251868	0.0744556	0.0399606	BOK/XBP1	2
GO:0042158	GO:0042158	lipoprotein biosynthetic process	2/48	96/18723	0.0251868	0.0744556	0.0399606	APOA1/APOE	2
GO:0055017	GO:0055017	cardiac muscle tissue growth	2/48	96/18723	0.0251868	0.0744556	0.0399606	CDK1/IGF1	2
GO:0002887	GO:0002887	negative regulation of myeloid leukocyte mediated immunity	1/48	10/18723	0.0253492	0.0744556	0.0399606	HMOX1	1
GO:0002934	GO:0002934	desmosome organization	1/48	10/18723	0.0253492	0.0744556	0.0399606	DSP	1
GO:0009750	GO:0009750	response to fructose	1/48	10/18723	0.0253492	0.0744556	0.0399606	XBP1	1
GO:0010944	GO:0010944	negative regulation of transcription by competitive promoter binding	1/48	10/18723	0.0253492	0.0744556	0.0399606	MUC1	1
GO:0014041	GO:0014041	regulation of neuron maturation	1/48	10/18723	0.0253492	0.0744556	0.0399606	LRRK2	1
GO:0016139	GO:0016139	glycoside catabolic process	1/48	10/18723	0.0253492	0.0744556	0.0399606	GLA	1
GO:0030300	GO:0030300	regulation of intestinal cholesterol absorption	1/48	10/18723	0.0253492	0.0744556	0.0399606	APOA1	1
GO:0031340	GO:0031340	positive regulation of vesicle fusion	1/48	10/18723	0.0253492	0.0744556	0.0399606	SNCA	1
GO:0034356	GO:0034356	NAD biosynthesis via nicotinamide riboside salvage pathway	1/48	10/18723	0.0253492	0.0744556	0.0399606	PTGIS	1
GO:0035376	GO:0035376	sterol import	1/48	10/18723	0.0253492	0.0744556	0.0399606	APOA1	1
GO:0035747	GO:0035747	natural killer cell chemotaxis	1/48	10/18723	0.0253492	0.0744556	0.0399606	CCL2	1
GO:0042045	GO:0042045	epithelial fluid transport	1/48	10/18723	0.0253492	0.0744556	0.0399606	ITPR1	1
GO:0045348	GO:0045348	positive regulation of MHC class II biosynthetic process	1/48	10/18723	0.0253492	0.0744556	0.0399606	XBP1	1
GO:0045898	GO:0045898	regulation of RNA polymerase II transcription preinitiation complex assembly	1/48	10/18723	0.0253492	0.0744556	0.0399606	ESR1	1
GO:0048755	GO:0048755	branching morphogenesis of a nerve	1/48	10/18723	0.0253492	0.0744556	0.0399606	LRRK2	1
GO:0051006	GO:0051006	positive regulation of lipoprotein lipase activity	1/48	10/18723	0.0253492	0.0744556	0.0399606	APOA1	1
GO:0060068	GO:0060068	vagina development	1/48	10/18723	0.0253492	0.0744556	0.0399606	ESR1	1
GO:0060525	GO:0060525	prostate glandular acinus development	1/48	10/18723	0.0253492	0.0744556	0.0399606	ESR1	1
GO:0060736	GO:0060736	prostate gland growth	1/48	10/18723	0.0253492	0.0744556	0.0399606	ESR1	1
GO:0061179	GO:0061179	negative regulation of insulin secretion involved in cellular response to glucose stimulus	1/48	10/18723	0.0253492	0.0744556	0.0399606	HMGCR	1
GO:0070091	GO:0070091	glucagon secretion	1/48	10/18723	0.0253492	0.0744556	0.0399606	IL6	1
GO:0070092	GO:0070092	regulation of glucagon secretion	1/48	10/18723	0.0253492	0.0744556	0.0399606	IL6	1
GO:0070508	GO:0070508	cholesterol import	1/48	10/18723	0.0253492	0.0744556	0.0399606	APOA1	1
GO:0072378	GO:0072378	blood coagulation, fibrin clot formation	1/48	10/18723	0.0253492	0.0744556	0.0399606	FN1	1
GO:0090209	GO:0090209	negative regulation of triglyceride metabolic process	1/48	10/18723	0.0253492	0.0744556	0.0399606	APOE	1
GO:0097084	GO:0097084	vascular associated smooth muscle cell development	1/48	10/18723	0.0253492	0.0744556	0.0399606	COMP	1
GO:1901725	GO:1901725	regulation of histone deacetylase activity	1/48	10/18723	0.0253492	0.0744556	0.0399606	LRRK2	1
GO:1903980	GO:1903980	positive regulation of microglial cell activation	1/48	10/18723	0.0253492	0.0744556	0.0399606	LRRK2	1
GO:2000425	GO:2000425	regulation of apoptotic cell clearance	1/48	10/18723	0.0253492	0.0744556	0.0399606	CCL2	1
GO:2000659	GO:2000659	regulation of interleukin-1-mediated signaling pathway	1/48	10/18723	0.0253492	0.0744556	0.0399606	IL6	1
GO:2000674	GO:2000674	regulation of type B pancreatic cell apoptotic process	1/48	10/18723	0.0253492	0.0744556	0.0399606	IL6	1
GO:0043255	GO:0043255	regulation of carbohydrate biosynthetic process	2/48	97/18723	0.0256756	0.0750517	0.0402805	SNCA/IGF1	2
GO:1990868	GO:1990868	response to chemokine	2/48	97/18723	0.0256756	0.0750517	0.0402805	CCL2/CXCL8	2
GO:1990869	GO:1990869	cellular response to chemokine	2/48	97/18723	0.0256756	0.0750517	0.0402805	CCL2/CXCL8	2
GO:2001237	GO:2001237	negative regulation of extrinsic apoptotic signaling pathway	2/48	97/18723	0.0256756	0.0750517	0.0402805	HMOX1/IGF1	2
GO:0050804	GO:0050804	modulation of chemical synaptic transmission	4/48	439/18723	0.0257763	0.0752557	0.04039	SNCA/LRRK2/CCL2/APOE	4
GO:1901988	GO:1901988	negative regulation of cell cycle phase transition	3/48	249/18723	0.0259074	0.0755477	0.0405467	CCL2/CDK1/MUC1	3
GO:0099177	GO:0099177	regulation of trans-synaptic signaling	4/48	440/18723	0.0259648	0.0756245	0.0405879	SNCA/LRRK2/CCL2/APOE	4
GO:0032642	GO:0032642	regulation of chemokine production	2/48	98/18723	0.0261682	0.0760348	0.0408082	HMOX1/IL6	2
GO:1902882	GO:1902882	regulation of response to oxidative stress	2/48	98/18723	0.0261682	0.0760348	0.0408082	LRRK2/TXN	2
GO:0000045	GO:0000045	autophagosome assembly	2/48	99/18723	0.0266647	0.0763578	0.0409815	LRRK2/NUPR1	2
GO:0002444	GO:0002444	myeloid leukocyte mediated immunity	2/48	99/18723	0.0266647	0.0763578	0.0409815	HMOX1/IL6	2
GO:0003300	GO:0003300	cardiac muscle hypertrophy	2/48	99/18723	0.0266647	0.0763578	0.0409815	RYR2/IGF1	2
GO:0006165	GO:0006165	nucleoside diphosphate phosphorylation	2/48	99/18723	0.0266647	0.0763578	0.0409815	NUPR1/IGF1	2
GO:0032602	GO:0032602	chemokine production	2/48	99/18723	0.0266647	0.0763578	0.0409815	HMOX1/IL6	2
GO:0051153	GO:0051153	regulation of striated muscle cell differentiation	2/48	99/18723	0.0266647	0.0763578	0.0409815	XBP1/IGF1	2
GO:0060291	GO:0060291	long-term synaptic potentiation	2/48	99/18723	0.0266647	0.0763578	0.0409815	SNCA/APOE	2
GO:0060996	GO:0060996	dendritic spine development	2/48	99/18723	0.0266647	0.0763578	0.0409815	LRRK2/APOE	2
GO:0010951	GO:0010951	negative regulation of endopeptidase activity	3/48	252/18723	0.0267171	0.0763578	0.0409815	SNCA/COL7A1/SERPINA1	3
GO:0009743	GO:0009743	response to carbohydrate	3/48	253/18723	0.02699	0.0763578	0.0409815	MAP2K6/XBP1/HMGCR	3
GO:0097305	GO:0097305	response to alcohol	3/48	253/18723	0.02699	0.0763578	0.0409815	VCAM1/CDK1/HMGCR	3
GO:0006641	GO:0006641	triglyceride metabolic process	2/48	100/18723	0.0271651	0.0763578	0.0409815	APOA1/APOE	2
GO:0019218	GO:0019218	regulation of steroid metabolic process	2/48	100/18723	0.0271651	0.0763578	0.0409815	APOA1/APOE	2
GO:0046545	GO:0046545	development of primary female sexual characteristics	2/48	100/18723	0.0271651	0.0763578	0.0409815	ESR1/NUPR1	2
GO:0051588	GO:0051588	regulation of neurotransmitter transport	2/48	100/18723	0.0271651	0.0763578	0.0409815	SNCA/LRRK2	2
GO:0060079	GO:0060079	excitatory postsynaptic potential	2/48	100/18723	0.0271651	0.0763578	0.0409815	SNCA/LRRK2	2
GO:0060840	GO:0060840	artery development	2/48	100/18723	0.0271651	0.0763578	0.0409815	COMP/APOE	2
GO:0010876	GO:0010876	lipid localization	4/48	448/18723	0.0275031	0.0763578	0.0409815	APOA1/MAP2K6/APOE/IL6	4
GO:0046939	GO:0046939	nucleotide phosphorylation	2/48	101/18723	0.0276692	0.0763578	0.0409815	NUPR1/IGF1	2
GO:0098869	GO:0098869	cellular oxidant detoxification	2/48	101/18723	0.0276692	0.0763578	0.0409815	TXN/APOE	2
GO:0006707	GO:0006707	cholesterol catabolic process	1/48	11/18723	0.0278492	0.0763578	0.0409815	APOE	1
GO:0016127	GO:0016127	sterol catabolic process	1/48	11/18723	0.0278492	0.0763578	0.0409815	APOE	1
GO:0032308	GO:0032308	positive regulation of prostaglandin secretion	1/48	11/18723	0.0278492	0.0763578	0.0409815	MAP2K6	1
GO:0033483	GO:0033483	gas homeostasis	1/48	11/18723	0.0278492	0.0763578	0.0409815	AQP11	1
GO:0034115	GO:0034115	negative regulation of heterotypic cell-cell adhesion	1/48	11/18723	0.0278492	0.0763578	0.0409815	APOA1	1
GO:0034163	GO:0034163	regulation of toll-like receptor 9 signaling pathway	1/48	11/18723	0.0278492	0.0763578	0.0409815	RSAD2	1
GO:0034350	GO:0034350	regulation of glial cell apoptotic process	1/48	11/18723	0.0278492	0.0763578	0.0409815	CCL2	1
GO:0034975	GO:0034975	protein folding in endoplasmic reticulum	1/48	11/18723	0.0278492	0.0763578	0.0409815	DNAJC10	1
GO:0042167	GO:0042167	heme catabolic process	1/48	11/18723	0.0278492	0.0763578	0.0409815	HMOX1	1
GO:0042416	GO:0042416	dopamine biosynthetic process	1/48	11/18723	0.0278492	0.0763578	0.0409815	SNCA	1
GO:0043619	GO:0043619	regulation of transcription from RNA polymerase II promoter in response to oxidative stress	1/48	11/18723	0.0278492	0.0763578	0.0409815	HMOX1	1
GO:0046149	GO:0046149	pigment catabolic process	1/48	11/18723	0.0278492	0.0763578	0.0409815	HMOX1	1
GO:0051610	GO:0051610	serotonin uptake	1/48	11/18723	0.0278492	0.0763578	0.0409815	SNCA	1
GO:0055015	GO:0055015	ventricular cardiac muscle cell development	1/48	11/18723	0.0278492	0.0763578	0.0409815	CDK1	1
GO:0060159	GO:0060159	regulation of dopamine receptor signaling pathway	1/48	11/18723	0.0278492	0.0763578	0.0409815	LRRK2	1
GO:0061365	GO:0061365	positive regulation of triglyceride lipase activity	1/48	11/18723	0.0278492	0.0763578	0.0409815	APOA1	1
GO:0070587	GO:0070587	regulation of cell-cell adhesion involved in gastrulation	1/48	11/18723	0.0278492	0.0763578	0.0409815	APOA1	1
GO:0071313	GO:0071313	cellular response to caffeine	1/48	11/18723	0.0278492	0.0763578	0.0409815	RYR2	1
GO:0086016	GO:0086016	AV node cell action potential	1/48	11/18723	0.0278492	0.0763578	0.0409815	RYR2	1
GO:0086027	GO:0086027	AV node cell to bundle of His cell signaling	1/48	11/18723	0.0278492	0.0763578	0.0409815	RYR2	1
GO:0086070	GO:0086070	SA node cell to atrial cardiac muscle cell communication	1/48	11/18723	0.0278492	0.0763578	0.0409815	RYR2	1
GO:0090394	GO:0090394	negative regulation of excitatory postsynaptic potential	1/48	11/18723	0.0278492	0.0763578	0.0409815	LRRK2	1
GO:0099566	GO:0099566	regulation of postsynaptic cytosolic calcium ion concentration	1/48	11/18723	0.0278492	0.0763578	0.0409815	ITPR1	1
GO:1900222	GO:1900222	negative regulation of amyloid-beta clearance	1/48	11/18723	0.0278492	0.0763578	0.0409815	HMGCR	1
GO:1901030	GO:1901030	positive regulation of mitochondrial outer membrane permeabilization involved in apoptotic signaling pathway	1/48	11/18723	0.0278492	0.0763578	0.0409815	BOK	1
GO:1902510	GO:1902510	regulation of apoptotic DNA fragmentation	1/48	11/18723	0.0278492	0.0763578	0.0409815	IL6	1
GO:1903423	GO:1903423	positive regulation of synaptic vesicle recycling	1/48	11/18723	0.0278492	0.0763578	0.0409815	LRRK2	1
GO:1903897	GO:1903897	regulation of PERK-mediated unfolded protein response	1/48	11/18723	0.0278492	0.0763578	0.0409815	BOK	1
GO:1904729	GO:1904729	regulation of intestinal lipid absorption	1/48	11/18723	0.0278492	0.0763578	0.0409815	APOA1	1
GO:2000644	GO:2000644	regulation of receptor catabolic process	1/48	11/18723	0.0278492	0.0763578	0.0409815	APOE	1
GO:0014897	GO:0014897	striated muscle hypertrophy	2/48	102/18723	0.0281772	0.0770831	0.0413708	RYR2/IGF1	2
GO:0062014	GO:0062014	negative regulation of small molecule metabolic process	2/48	102/18723	0.0281772	0.0770831	0.0413708	NUPR1/APOE	2
GO:0042593	GO:0042593	glucose homeostasis	3/48	258/18723	0.0283771	0.0775428	0.0416175	XBP1/HMGCR/IL6	3
GO:0033500	GO:0033500	carbohydrate homeostasis	3/48	259/18723	0.028659	0.0776963	0.0416999	XBP1/HMGCR/IL6	3
GO:0045927	GO:0045927	positive regulation of growth	3/48	259/18723	0.028659	0.0776963	0.0416999	CDK1/FN1/IGF1	3
GO:0009135	GO:0009135	purine nucleoside diphosphate metabolic process	2/48	103/18723	0.0286889	0.0776963	0.0416999	NUPR1/IGF1	2
GO:0009179	GO:0009179	purine ribonucleoside diphosphate metabolic process	2/48	103/18723	0.0286889	0.0776963	0.0416999	NUPR1/IGF1	2
GO:0030004	GO:0030004	cellular monovalent inorganic cation homeostasis	2/48	103/18723	0.0286889	0.0776963	0.0416999	AQP11/LRRK2	2
GO:0030593	GO:0030593	neutrophil chemotaxis	2/48	103/18723	0.0286889	0.0776963	0.0416999	CCL2/CXCL8	2
GO:0032760	GO:0032760	positive regulation of tumor necrosis factor production	2/48	103/18723	0.0286889	0.0776963	0.0416999	LRRK2/IL6	2
GO:1905037	GO:1905037	autophagosome organization	2/48	103/18723	0.0286889	0.0776963	0.0416999	LRRK2/NUPR1	2
GO:0014896	GO:0014896	muscle hypertrophy	2/48	104/18723	0.0292043	0.0783556	0.0420537	RYR2/IGF1	2
GO:0045621	GO:0045621	positive regulation of lymphocyte differentiation	2/48	104/18723	0.0292043	0.0783556	0.0420537	XBP1/HLA-DRA	2
GO:0060419	GO:0060419	heart growth	2/48	104/18723	0.0292043	0.0783556	0.0420537	CDK1/IGF1	2
GO:0007346	GO:0007346	regulation of mitotic cell cycle	4/48	457/18723	0.0292982	0.0783556	0.0420537	CCL2/CDK1/MUC1/IGF1	4
GO:0010466	GO:0010466	negative regulation of peptidase activity	3/48	262/18723	0.0295138	0.0783556	0.0420537	SNCA/COL7A1/SERPINA1	3
GO:0016079	GO:0016079	synaptic vesicle exocytosis	2/48	105/18723	0.0297235	0.0783556	0.0420537	SNCA/LRRK2	2
GO:0062207	GO:0062207	regulation of pattern recognition receptor signaling pathway	2/48	105/18723	0.0297235	0.0783556	0.0420537	ESR1/RSAD2	2
GO:0003018	GO:0003018	vascular process in circulatory system	3/48	263/18723	0.0298018	0.0783556	0.0420537	HMGCR/COMP/APOE	3
GO:0006090	GO:0006090	pyruvate metabolic process	2/48	106/18723	0.0302463	0.0783556	0.0420537	NUPR1/IGF1	2
GO:0009185	GO:0009185	ribonucleoside diphosphate metabolic process	2/48	106/18723	0.0302463	0.0783556	0.0420537	NUPR1/IGF1	2
GO:0046620	GO:0046620	regulation of organ growth	2/48	106/18723	0.0302463	0.0783556	0.0420537	CDK1/IGF1	2
GO:0046822	GO:0046822	regulation of nucleocytoplasmic transport	2/48	106/18723	0.0302463	0.0783556	0.0420537	CDK1/TXN	2
GO:0099565	GO:0099565	chemical synaptic transmission, postsynaptic	2/48	106/18723	0.0302463	0.0783556	0.0420537	SNCA/LRRK2	2
GO:0006787	GO:0006787	porphyrin-containing compound catabolic process	1/48	12/18723	0.030343	0.0783556	0.0420537	HMOX1	1
GO:0010459	GO:0010459	negative regulation of heart rate	1/48	12/18723	0.030343	0.0783556	0.0420537	PLN	1
GO:0010642	GO:0010642	negative regulation of platelet-derived growth factor receptor signaling pathway	1/48	12/18723	0.030343	0.0783556	0.0420537	SNCA	1
GO:0032306	GO:0032306	regulation of prostaglandin secretion	1/48	12/18723	0.030343	0.0783556	0.0420537	MAP2K6	1
GO:0032780	GO:0032780	negative regulation of ATPase activity	1/48	12/18723	0.030343	0.0783556	0.0420537	PLN	1
GO:0033004	GO:0033004	negative regulation of mast cell activation	1/48	12/18723	0.030343	0.0783556	0.0420537	HMOX1	1
GO:0033015	GO:0033015	tetrapyrrole catabolic process	1/48	12/18723	0.030343	0.0783556	0.0420537	HMOX1	1
GO:0033629	GO:0033629	negative regulation of cell adhesion mediated by integrin	1/48	12/18723	0.030343	0.0783556	0.0420537	MUC1	1
GO:0034154	GO:0034154	toll-like receptor 7 signaling pathway	1/48	12/18723	0.030343	0.0783556	0.0420537	RSAD2	1
GO:0034392	GO:0034392	negative regulation of smooth muscle cell apoptotic process	1/48	12/18723	0.030343	0.0783556	0.0420537	IGF1	1
GO:0042762	GO:0042762	regulation of sulfur metabolic process	1/48	12/18723	0.030343	0.0783556	0.0420537	SNCA	1
GO:0043301	GO:0043301	negative regulation of leukocyte degranulation	1/48	12/18723	0.030343	0.0783556	0.0420537	HMOX1	1
GO:0043380	GO:0043380	regulation of memory T cell differentiation	1/48	12/18723	0.030343	0.0783556	0.0420537	HLA-DRA	1
GO:0043568	GO:0043568	positive regulation of insulin-like growth factor receptor signaling pathway	1/48	12/18723	0.030343	0.0783556	0.0420537	IGF1	1
GO:0051001	GO:0051001	negative regulation of nitric-oxide synthase activity	1/48	12/18723	0.030343	0.0783556	0.0420537	GLA	1
GO:0051583	GO:0051583	dopamine uptake involved in synaptic transmission	1/48	12/18723	0.030343	0.0783556	0.0420537	SNCA	1
GO:0051934	GO:0051934	catecholamine uptake involved in synaptic transmission	1/48	12/18723	0.030343	0.0783556	0.0420537	SNCA	1
GO:0060442	GO:0060442	branching involved in prostate gland morphogenesis	1/48	12/18723	0.030343	0.0783556	0.0420537	ESR1	1
GO:0061051	GO:0061051	positive regulation of cell growth involved in cardiac muscle cell development	1/48	12/18723	0.030343	0.0783556	0.0420537	IGF1	1
GO:0070493	GO:0070493	thrombin-activated receptor signaling pathway	1/48	12/18723	0.030343	0.0783556	0.0420537	SNCA	1
GO:0070586	GO:0070586	cell-cell adhesion involved in gastrulation	1/48	12/18723	0.030343	0.0783556	0.0420537	APOA1	1
GO:0071287	GO:0071287	cellular response to manganese ion	1/48	12/18723	0.030343	0.0783556	0.0420537	LRRK2	1
GO:0071635	GO:0071635	negative regulation of transforming growth factor beta production	1/48	12/18723	0.030343	0.0783556	0.0420537	FN1	1
GO:0072376	GO:0072376	protein activation cascade	1/48	12/18723	0.030343	0.0783556	0.0420537	FN1	1
GO:0072683	GO:0072683	T cell extravasation	1/48	12/18723	0.030343	0.0783556	0.0420537	CCL2	1
GO:0086067	GO:0086067	AV node cell to bundle of His cell communication	1/48	12/18723	0.030343	0.0783556	0.0420537	RYR2	1
GO:0150065	GO:0150065	regulation of deacetylase activity	1/48	12/18723	0.030343	0.0783556	0.0420537	LRRK2	1
GO:1902950	GO:1902950	regulation of dendritic spine maintenance	1/48	12/18723	0.030343	0.0783556	0.0420537	APOE	1
GO:1903624	GO:1903624	regulation of DNA catabolic process	1/48	12/18723	0.030343	0.0783556	0.0420537	IL6	1
GO:1903800	GO:1903800	positive regulation of production of miRNAs involved in gene silencing by miRNA	1/48	12/18723	0.030343	0.0783556	0.0420537	IL6	1
GO:0051607	GO:0051607	defense response to virus	3/48	265/18723	0.0303821	0.0783556	0.0420537	RSAD2/MX1/IL6	3
GO:0140546	GO:0140546	defense response to symbiont	3/48	265/18723	0.0303821	0.0783556	0.0420537	RSAD2/MX1/IL6	3
GO:0016570	GO:0016570	histone modification	4/48	463/18723	0.0305331	0.0786616	0.042218	SNCA/LRRK2/CDK1/MUC1	4
GO:0007229	GO:0007229	integrin-mediated signaling pathway	2/48	107/18723	0.0307728	0.079028	0.0424146	APOA1/FN1	2
GO:0008637	GO:0008637	apoptotic mitochondrial changes	2/48	107/18723	0.0307728	0.079028	0.0424146	BOK/IGF1	2
GO:1903557	GO:1903557	positive regulation of tumor necrosis factor superfamily cytokine production	2/48	107/18723	0.0307728	0.079028	0.0424146	LRRK2/IL6	2
GO:0051348	GO:0051348	negative regulation of transferase activity	3/48	268/18723	0.0312639	0.0802044	0.043046	SNCA/HMGCR/APOE	3
GO:0034446	GO:0034446	substrate adhesion-dependent cell spreading	2/48	108/18723	0.031303	0.0802201	0.0430544	APOA1/FN1	2
GO:0032410	GO:0032410	negative regulation of transporter activity	2/48	109/18723	0.0318368	0.0815022	0.0437425	SNCA/PLN	2
GO:0002698	GO:0002698	negative regulation of immune effector process	2/48	110/18723	0.0323742	0.0823981	0.0442233	APOA1/HMOX1	2
GO:0009408	GO:0009408	response to heat	2/48	110/18723	0.0323742	0.0823981	0.0442233	HMOX1/IGF1	2
GO:0061387	GO:0061387	regulation of extent of cell growth	2/48	110/18723	0.0323742	0.0823981	0.0442233	FN1/APOE	2
GO:0005513	GO:0005513	detection of calcium ion	1/48	13/18723	0.0328305	0.0823981	0.0442233	RYR2	1
GO:0015791	GO:0015791	polyol transport	1/48	13/18723	0.0328305	0.0823981	0.0442233	AQP11	1
GO:0018206	GO:0018206	peptidyl-methionine modification	1/48	13/18723	0.0328305	0.0823981	0.0442233	APOA1	1
GO:0031053	GO:0031053	primary miRNA processing	1/48	13/18723	0.0328305	0.0823981	0.0442233	IL6	1
GO:0032494	GO:0032494	response to peptidoglycan	1/48	13/18723	0.0328305	0.0823981	0.0442233	IL6	1
GO:0034112	GO:0034112	positive regulation of homotypic cell-cell adhesion	1/48	13/18723	0.0328305	0.0823981	0.0442233	IL6	1
GO:0034982	GO:0034982	mitochondrial protein processing	1/48	13/18723	0.0328305	0.0823981	0.0442233	LRRK2	1
GO:0043379	GO:0043379	memory T cell differentiation	1/48	13/18723	0.0328305	0.0823981	0.0442233	HLA-DRA	1
GO:0044794	GO:0044794	positive regulation by host of viral process	1/48	13/18723	0.0328305	0.0823981	0.0442233	APOE	1
GO:0061469	GO:0061469	regulation of type B pancreatic cell proliferation	1/48	13/18723	0.0328305	0.0823981	0.0442233	NUPR1	1
GO:0072578	GO:0072578	neurotransmitter-gated ion channel clustering	1/48	13/18723	0.0328305	0.0823981	0.0442233	APOE	1
GO:0090158	GO:0090158	endoplasmic reticulum membrane organization	1/48	13/18723	0.0328305	0.0823981	0.0442233	STX18	1
GO:1900272	GO:1900272	negative regulation of long-term synaptic potentiation	1/48	13/18723	0.0328305	0.0823981	0.0442233	APOE	1
GO:1904478	GO:1904478	regulation of intestinal absorption	1/48	13/18723	0.0328305	0.0823981	0.0442233	APOA1	1
GO:1905907	GO:1905907	negative regulation of amyloid fibril formation	1/48	13/18723	0.0328305	0.0823981	0.0442233	APOE	1
GO:1905939	GO:1905939	regulation of gonad development	1/48	13/18723	0.0328305	0.0823981	0.0442233	NUPR1	1
GO:0014066	GO:0014066	regulation of phosphatidylinositol 3-kinase signaling	2/48	111/18723	0.0329153	0.0825257	0.0442918	FN1/IGF1	2
GO:0001667	GO:0001667	ameboidal-type cell migration	4/48	475/18723	0.033095	0.0828909	0.0444878	APOA1/HMOX1/FN1/APOE	4
GO:0043406	GO:0043406	positive regulation of MAP kinase activity	2/48	112/18723	0.0334598	0.0837184	0.044932	LRRK2/MAP3K5	2
GO:0007548	GO:0007548	sex differentiation	3/48	276/18723	0.033681	0.0841853	0.0451825	ESR1/BOK/NUPR1	3
GO:0031623	GO:0031623	receptor internalization	2/48	113/18723	0.034008	0.0849152	0.0455743	SNCA/CXCL8	2
GO:0002286	GO:0002286	T cell activation involved in immune response	2/48	114/18723	0.0345596	0.0852812	0.0457707	HLA-DRA/IL6	2
GO:0022904	GO:0022904	respiratory electron transport chain	2/48	114/18723	0.0345596	0.0852812	0.0457707	SNCA/CDK1	2
GO:0046660	GO:0046660	female sex differentiation	2/48	114/18723	0.0345596	0.0852812	0.0457707	ESR1/NUPR1	2
GO:1901800	GO:1901800	positive regulation of proteasomal protein catabolic process	2/48	114/18723	0.0345596	0.0852812	0.0457707	LRRK2/NUPR1	2
GO:0043542	GO:0043542	endothelial cell migration	3/48	279/18723	0.034612	0.0852812	0.0457707	APOA1/HMOX1/APOE	3
GO:0000077	GO:0000077	DNA damage checkpoint signaling	2/48	115/18723	0.0351148	0.0852812	0.0457707	CDK1/MUC1	2
GO:0043279	GO:0043279	response to alkaloid	2/48	115/18723	0.0351148	0.0852812	0.0457707	RYR2/SNCA	2
GO:0046916	GO:0046916	cellular transition metal ion homeostasis	2/48	115/18723	0.0351148	0.0852812	0.0457707	HMOX1/CP	2
GO:0001921	GO:0001921	positive regulation of receptor recycling	1/48	14/18723	0.0353117	0.0852812	0.0457707	SNCA	1
GO:0003214	GO:0003214	cardiac left ventricle morphogenesis	1/48	14/18723	0.0353117	0.0852812	0.0457707	RYR2	1
GO:0010896	GO:0010896	regulation of triglyceride catabolic process	1/48	14/18723	0.0353117	0.0852812	0.0457707	APOA1	1
GO:0018158	GO:0018158	protein oxidation	1/48	14/18723	0.0353117	0.0852812	0.0457707	APOA1	1
GO:0031115	GO:0031115	negative regulation of microtubule polymerization	1/48	14/18723	0.0353117	0.0852812	0.0457707	SNCA	1
GO:0032966	GO:0032966	negative regulation of collagen biosynthetic process	1/48	14/18723	0.0353117	0.0852812	0.0457707	IL6	1
GO:0035630	GO:0035630	bone mineralization involved in bone maturation	1/48	14/18723	0.0353117	0.0852812	0.0457707	IGF1	1
GO:0038183	GO:0038183	bile acid signaling pathway	1/48	14/18723	0.0353117	0.0852812	0.0457707	HMGCR	1
GO:0045579	GO:0045579	positive regulation of B cell differentiation	1/48	14/18723	0.0353117	0.0852812	0.0457707	XBP1	1
GO:0045820	GO:0045820	negative regulation of glycolytic process	1/48	14/18723	0.0353117	0.0852812	0.0457707	NUPR1	1
GO:0046479	GO:0046479	glycosphingolipid catabolic process	1/48	14/18723	0.0353117	0.0852812	0.0457707	GLA	1
GO:0048148	GO:0048148	behavioral response to cocaine	1/48	14/18723	0.0353117	0.0852812	0.0457707	SNCA	1
GO:0050930	GO:0050930	induction of positive chemotaxis	1/48	14/18723	0.0353117	0.0852812	0.0457707	CXCL8	1
GO:0051589	GO:0051589	negative regulation of neurotransmitter transport	1/48	14/18723	0.0353117	0.0852812	0.0457707	SNCA	1
GO:0060732	GO:0060732	positive regulation of inositol phosphate biosynthetic process	1/48	14/18723	0.0353117	0.0852812	0.0457707	SNCA	1
GO:0061043	GO:0061043	regulation of vascular wound healing	1/48	14/18723	0.0353117	0.0852812	0.0457707	XBP1	1
GO:0071415	GO:0071415	cellular response to purine-containing compound	1/48	14/18723	0.0353117	0.0852812	0.0457707	RYR2	1
GO:0072540	GO:0072540	T-helper 17 cell lineage commitment	1/48	14/18723	0.0353117	0.0852812	0.0457707	IL6	1
GO:0086103	GO:0086103	G protein-coupled receptor signaling pathway involved in heart process	1/48	14/18723	0.0353117	0.0852812	0.0457707	PLN	1
GO:0090239	GO:0090239	regulation of histone H4 acetylation	1/48	14/18723	0.0353117	0.0852812	0.0457707	MUC1	1
GO:0090281	GO:0090281	negative regulation of calcium ion import	1/48	14/18723	0.0353117	0.0852812	0.0457707	PLN	1
GO:0090715	GO:0090715	immunological memory formation process	1/48	14/18723	0.0353117	0.0852812	0.0457707	HLA-DRA	1
GO:1901077	GO:1901077	regulation of relaxation of muscle	1/48	14/18723	0.0353117	0.0852812	0.0457707	PLN	1
GO:1901857	GO:1901857	positive regulation of cellular respiration	1/48	14/18723	0.0353117	0.0852812	0.0457707	NUPR1	1
GO:1902166	GO:1902166	negative regulation of intrinsic apoptotic signaling pathway in response to DNA damage by p53 class mediator	1/48	14/18723	0.0353117	0.0852812	0.0457707	MUC1	1
GO:1903532	GO:1903532	positive regulation of secretion by cell	3/48	282/18723	0.0355564	0.0855599	0.0459203	SNCA/MAP2K6/IGF1	3
GO:0007006	GO:0007006	mitochondrial membrane organization	2/48	116/18723	0.0356734	0.0855599	0.0459203	SNCA/BOK	2
GO:0018107	GO:0018107	peptidyl-threonine phosphorylation	2/48	116/18723	0.0356734	0.0855599	0.0459203	LRRK2/CDK1	2
GO:0021782	GO:0021782	glial cell development	2/48	116/18723	0.0356734	0.0855599	0.0459203	NDRG1/IL6	2
GO:0030518	GO:0030518	intracellular steroid hormone receptor signaling pathway	2/48	116/18723	0.0356734	0.0855599	0.0459203	ESR1/NR3C2	2
GO:0035967	GO:0035967	cellular response to topologically incorrect protein	2/48	116/18723	0.0356734	0.0855599	0.0459203	BOK/XBP1	2
GO:1990748	GO:1990748	cellular detoxification	2/48	116/18723	0.0356734	0.0855599	0.0459203	TXN/APOE	2
GO:0044262	GO:0044262	cellular carbohydrate metabolic process	3/48	283/18723	0.0358742	0.085872	0.0460878	SNCA/NUPR1/IGF1	3
GO:0051146	GO:0051146	striated muscle cell differentiation	3/48	283/18723	0.0358742	0.085872	0.0460878	CDK1/XBP1/IGF1	3
GO:0014902	GO:0014902	myotube differentiation	2/48	117/18723	0.0362355	0.0864817	0.046415	XBP1/IGF1	2
GO:0030301	GO:0030301	cholesterol transport	2/48	117/18723	0.0362355	0.0864817	0.046415	APOA1/APOE	2
GO:1903828	GO:1903828	negative regulation of cellular protein localization	2/48	117/18723	0.0362355	0.0864817	0.046415	LRRK2/TXN	2
GO:0006091	GO:0006091	generation of precursor metabolites and energy	4/48	490/18723	0.036471	0.0869584	0.0466709	SNCA/CDK1/NUPR1/IGF1	4
GO:0009308	GO:0009308	amine metabolic process	2/48	118/18723	0.0368011	0.0875213	0.046973	VCAM1/SNCA	2
GO:0030282	GO:0030282	bone mineralization	2/48	119/18723	0.0373701	0.0875213	0.046973	COMP/IGF1	2
GO:0046651	GO:0046651	lymphocyte proliferation	3/48	288/18723	0.0374851	0.0875213	0.046973	VCAM1/IGF1/IL6	3
GO:1901361	GO:1901361	organic cyclic compound catabolic process	4/48	495/18723	0.0376394	0.0875213	0.046973	HSD11B1/HMOX1/APOE/IL6	4
GO:0002468	GO:0002468	dendritic cell antigen processing and presentation	1/48	15/18723	0.0377867	0.0875213	0.046973	HLA-DRA	1
GO:0006825	GO:0006825	copper ion transport	1/48	15/18723	0.0377867	0.0875213	0.046973	CP	1
GO:0010713	GO:0010713	negative regulation of collagen metabolic process	1/48	15/18723	0.0377867	0.0875213	0.046973	IL6	1
GO:0010832	GO:0010832	negative regulation of myotube differentiation	1/48	15/18723	0.0377867	0.0875213	0.046973	XBP1	1
GO:0014048	GO:0014048	regulation of glutamate secretion	1/48	15/18723	0.0377867	0.0875213	0.046973	SNCA	1
GO:0032310	GO:0032310	prostaglandin secretion	1/48	15/18723	0.0377867	0.0875213	0.046973	MAP2K6	1
GO:0035358	GO:0035358	regulation of peroxisome proliferator activated receptor signaling pathway	1/48	15/18723	0.0377867	0.0875213	0.046973	PTGIS	1
GO:0035493	GO:0035493	SNARE complex assembly	1/48	15/18723	0.0377867	0.0875213	0.046973	SNCA	1
GO:0042159	GO:0042159	lipoprotein catabolic process	1/48	15/18723	0.0377867	0.0875213	0.046973	APOE	1
GO:0045346	GO:0045346	regulation of MHC class II biosynthetic process	1/48	15/18723	0.0377867	0.0875213	0.046973	XBP1	1
GO:0045725	GO:0045725	positive regulation of glycogen biosynthetic process	1/48	15/18723	0.0377867	0.0875213	0.046973	IGF1	1
GO:0048308	GO:0048308	organelle inheritance	1/48	15/18723	0.0377867	0.0875213	0.046973	CDK1	1
GO:0048313	GO:0048313	Golgi inheritance	1/48	15/18723	0.0377867	0.0875213	0.046973	CDK1	1
GO:0051284	GO:0051284	positive regulation of sequestering of calcium ion	1/48	15/18723	0.0377867	0.0875213	0.046973	RYR2	1
GO:0051775	GO:0051775	response to redox state	1/48	15/18723	0.0377867	0.0875213	0.046973	RYR2	1
GO:0055012	GO:0055012	ventricular cardiac muscle cell differentiation	1/48	15/18723	0.0377867	0.0875213	0.046973	CDK1	1
GO:0055091	GO:0055091	phospholipid homeostasis	1/48	15/18723	0.0377867	0.0875213	0.046973	APOA1	1
GO:0070886	GO:0070886	positive regulation of calcineurin-NFAT signaling cascade	1/48	15/18723	0.0377867	0.0875213	0.046973	IGF1	1
GO:0086069	GO:0086069	bundle of His cell to Purkinje myocyte communication	1/48	15/18723	0.0377867	0.0875213	0.046973	DSP	1
GO:0090594	GO:0090594	inflammatory response to wounding	1/48	15/18723	0.0377867	0.0875213	0.046973	HMOX1	1
GO:0106058	GO:0106058	positive regulation of calcineurin-mediated signaling	1/48	15/18723	0.0377867	0.0875213	0.046973	IGF1	1
GO:0140374	GO:0140374	antiviral innate immune response	1/48	15/18723	0.0377867	0.0875213	0.046973	MX1	1
GO:1905288	GO:1905288	vascular associated smooth muscle cell apoptotic process	1/48	15/18723	0.0377867	0.0875213	0.046973	IGF1	1
GO:1905459	GO:1905459	regulation of vascular associated smooth muscle cell apoptotic process	1/48	15/18723	0.0377867	0.0875213	0.046973	IGF1	1
GO:2000345	GO:2000345	regulation of hepatocyte proliferation	1/48	15/18723	0.0377867	0.0875213	0.046973	XBP1	1
GO:2000402	GO:2000402	negative regulation of lymphocyte migration	1/48	15/18723	0.0377867	0.0875213	0.046973	CCL2	1
GO:0048675	GO:0048675	axon extension	2/48	120/18723	0.0379425	0.0877149	0.0470769	FN1/APOE	2
GO:0071901	GO:0071901	negative regulation of protein serine/threonine kinase activity	2/48	120/18723	0.0379425	0.0877149	0.0470769	HMGCR/APOE	2
GO:0034504	GO:0034504	protein localization to nucleus	3/48	290/18723	0.0381399	0.0880875	0.0472769	LRRK2/CDK1/TXN	3
GO:0016236	GO:0016236	macroautophagy	3/48	291/18723	0.0384694	0.0884573	0.0474754	HMOX1/LRRK2/NUPR1	3
GO:0032943	GO:0032943	mononuclear cell proliferation	3/48	291/18723	0.0384694	0.0884573	0.0474754	VCAM1/IGF1/IL6	3
GO:0001704	GO:0001704	formation of primary germ layer	2/48	121/18723	0.0385182	0.0884573	0.0474754	COL7A1/FN1	2
GO:0002224	GO:0002224	toll-like receptor signaling pathway	2/48	121/18723	0.0385182	0.0884573	0.0474754	ESR1/RSAD2	2
GO:0003206	GO:0003206	cardiac chamber morphogenesis	2/48	121/18723	0.0385182	0.0884573	0.0474754	RYR2/DSP	2
GO:0043500	GO:0043500	muscle adaptation	2/48	121/18723	0.0385182	0.0884573	0.0474754	HMOX1/IGF1	2
GO:1990266	GO:1990266	neutrophil migration	2/48	122/18723	0.0390974	0.0897026	0.0481437	CCL2/CXCL8	2
GO:0010948	GO:0010948	negative regulation of cell cycle process	3/48	294/18723	0.039467	0.0899229	0.0482619	CCL2/CDK1/MUC1	3
GO:0051604	GO:0051604	protein maturation	3/48	294/18723	0.039467	0.0899229	0.0482619	LRRK2/C1R/COMP	3
GO:0003231	GO:0003231	cardiac ventricle development	2/48	123/18723	0.0396798	0.0899229	0.0482619	RYR2/DSP	2
GO:0010811	GO:0010811	positive regulation of cell-substrate adhesion	2/48	123/18723	0.0396798	0.0899229	0.0482619	APOA1/FN1	2
GO:0031570	GO:0031570	DNA integrity checkpoint signaling	2/48	123/18723	0.0396798	0.0899229	0.0482619	CDK1/MUC1	2
GO:0050890	GO:0050890	cognition	3/48	296/18723	0.0401393	0.0899229	0.0482619	HMGCR/HLA-DRA/APOE	3
GO:0002399	GO:0002399	MHC class II protein complex assembly	1/48	16/18723	0.0402555	0.0899229	0.0482619	HLA-DRA	1
GO:0002503	GO:0002503	peptide antigen assembly with MHC class II protein complex	1/48	16/18723	0.0402555	0.0899229	0.0482619	HLA-DRA	1
GO:0006978	GO:0006978	DNA damage response, signal transduction by p53 class mediator resulting in transcription of p21 class mediator	1/48	16/18723	0.0402555	0.0899229	0.0482619	MUC1	1
GO:0010919	GO:0010919	regulation of inositol phosphate biosynthetic process	1/48	16/18723	0.0402555	0.0899229	0.0482619	SNCA	1
GO:0014819	GO:0014819	regulation of skeletal muscle contraction	1/48	16/18723	0.0402555	0.0899229	0.0482619	DMD	1
GO:0019377	GO:0019377	glycolipid catabolic process	1/48	16/18723	0.0402555	0.0899229	0.0482619	GLA	1
GO:0030540	GO:0030540	female genitalia development	1/48	16/18723	0.0402555	0.0899229	0.0482619	ESR1	1
GO:0034374	GO:0034374	low-density lipoprotein particle remodeling	1/48	16/18723	0.0402555	0.0899229	0.0482619	APOE	1
GO:0035067	GO:0035067	negative regulation of histone acetylation	1/48	16/18723	0.0402555	0.0899229	0.0482619	SNCA	1
GO:0035751	GO:0035751	regulation of lysosomal lumen pH	1/48	16/18723	0.0402555	0.0899229	0.0482619	LRRK2	1
GO:0045342	GO:0045342	MHC class II biosynthetic process	1/48	16/18723	0.0402555	0.0899229	0.0482619	XBP1	1
GO:0045779	GO:0045779	negative regulation of bone resorption	1/48	16/18723	0.0402555	0.0899229	0.0482619	IL6	1
GO:0048311	GO:0048311	mitochondrion distribution	1/48	16/18723	0.0402555	0.0899229	0.0482619	LRRK2	1
GO:0051044	GO:0051044	positive regulation of membrane protein ectodomain proteolysis	1/48	16/18723	0.0402555	0.0899229	0.0482619	APOE	1
GO:0061684	GO:0061684	chaperone-mediated autophagy	1/48	16/18723	0.0402555	0.0899229	0.0482619	SNCA	1
GO:0071391	GO:0071391	cellular response to estrogen stimulus	1/48	16/18723	0.0402555	0.0899229	0.0482619	ESR1	1
GO:1902165	GO:1902165	regulation of intrinsic apoptotic signaling pathway in response to DNA damage by p53 class mediator	1/48	16/18723	0.0402555	0.0899229	0.0482619	MUC1	1
GO:1902931	GO:1902931	negative regulation of alcohol biosynthetic process	1/48	16/18723	0.0402555	0.0899229	0.0482619	APOE	1
GO:1905906	GO:1905906	regulation of amyloid fibril formation	1/48	16/18723	0.0402555	0.0899229	0.0482619	APOE	1
GO:2000651	GO:2000651	positive regulation of sodium ion transmembrane transporter activity	1/48	16/18723	0.0402555	0.0899229	0.0482619	DMD	1
GO:0009132	GO:0009132	nucleoside diphosphate metabolic process	2/48	124/18723	0.0402656	0.0899229	0.0482619	NUPR1/IGF1	2
GO:0010508	GO:0010508	positive regulation of autophagy	2/48	124/18723	0.0402656	0.0899229	0.0482619	HMOX1/LRRK2	2
GO:0097237	GO:0097237	cellular response to toxic substance	2/48	124/18723	0.0402656	0.0899229	0.0482619	TXN/APOE	2
GO:0010720	GO:0010720	positive regulation of cell development	3/48	298/18723	0.0408175	0.0908215	0.0487442	APOA1/FN1/IL6	3
GO:0048511	GO:0048511	rhythmic process	3/48	298/18723	0.0408175	0.0908215	0.0487442	ESR1/CDK1/MAP2K6	3
GO:0018210	GO:0018210	peptidyl-threonine modification	2/48	125/18723	0.0408547	0.0908215	0.0487442	LRRK2/CDK1	2
GO:0055007	GO:0055007	cardiac muscle cell differentiation	2/48	125/18723	0.0408547	0.0908215	0.0487442	CDK1/IGF1	2
GO:0071621	GO:0071621	granulocyte chemotaxis	2/48	125/18723	0.0408547	0.0908215	0.0487442	CCL2/CXCL8	2
GO:1901990	GO:1901990	regulation of mitotic cell cycle phase transition	3/48	299/18723	0.0411588	0.0914139	0.0490622	CCL2/CDK1/MUC1	3
GO:0032874	GO:0032874	positive regulation of stress-activated MAPK cascade	2/48	126/18723	0.0414471	0.0919702	0.0493607	MAP3K5/HMGCR	2
GO:0006913	GO:0006913	nucleocytoplasmic transport	3/48	301/18723	0.0418458	0.0924293	0.0496071	LRRK2/CDK1/TXN	3
GO:0051169	GO:0051169	nuclear transport	3/48	301/18723	0.0418458	0.0924293	0.0496071	LRRK2/CDK1/TXN	3
GO:0035270	GO:0035270	endocrine system development	2/48	127/18723	0.0420427	0.0924293	0.0496071	APOA1/IL6	2
GO:0051056	GO:0051056	regulation of small GTPase mediated signal transduction	3/48	302/18723	0.0421914	0.0924293	0.0496071	APOA1/APOE/IGF1	3
GO:0015849	GO:0015849	organic acid transport	3/48	303/18723	0.0425385	0.0924293	0.0496071	SNCA/MAP2K6/APOE	3
GO:0006639	GO:0006639	acylglycerol metabolic process	2/48	128/18723	0.0426416	0.0924293	0.0496071	APOA1/APOE	2
GO:0033865	GO:0033865	nucleoside bisphosphate metabolic process	2/48	128/18723	0.0426416	0.0924293	0.0496071	SNCA/HMGCR	2
GO:0033875	GO:0033875	ribonucleoside bisphosphate metabolic process	2/48	128/18723	0.0426416	0.0924293	0.0496071	SNCA/HMGCR	2
GO:0034032	GO:0034032	purine nucleoside bisphosphate metabolic process	2/48	128/18723	0.0426416	0.0924293	0.0496071	SNCA/HMGCR	2
GO:0070304	GO:0070304	positive regulation of stress-activated protein kinase signaling cascade	2/48	128/18723	0.0426416	0.0924293	0.0496071	MAP3K5/HMGCR	2
GO:0001780	GO:0001780	neutrophil homeostasis	1/48	17/18723	0.0427181	0.0924293	0.0496071	IL6	1
GO:0006677	GO:0006677	glycosylceramide metabolic process	1/48	17/18723	0.0427181	0.0924293	0.0496071	GLA	1
GO:0008340	GO:0008340	determination of adult lifespan	1/48	17/18723	0.0427181	0.0924293	0.0496071	LRRK2	1
GO:0010715	GO:0010715	regulation of extracellular matrix disassembly	1/48	17/18723	0.0427181	0.0924293	0.0496071	IL6	1
GO:0021756	GO:0021756	striatum development	1/48	17/18723	0.0427181	0.0924293	0.0496071	LRRK2	1
GO:0034349	GO:0034349	glial cell apoptotic process	1/48	17/18723	0.0427181	0.0924293	0.0496071	CCL2	1
GO:0042053	GO:0042053	regulation of dopamine metabolic process	1/48	17/18723	0.0427181	0.0924293	0.0496071	SNCA	1
GO:0042069	GO:0042069	regulation of catecholamine metabolic process	1/48	17/18723	0.0427181	0.0924293	0.0496071	SNCA	1
GO:0042772	GO:0042772	DNA damage response, signal transduction resulting in transcription	1/48	17/18723	0.0427181	0.0924293	0.0496071	MUC1	1
GO:0043117	GO:0043117	positive regulation of vascular permeability	1/48	17/18723	0.0427181	0.0924293	0.0496071	APOE	1
GO:0045591	GO:0045591	positive regulation of regulatory T cell differentiation	1/48	17/18723	0.0427181	0.0924293	0.0496071	HLA-DRA	1
GO:0051580	GO:0051580	regulation of neurotransmitter uptake	1/48	17/18723	0.0427181	0.0924293	0.0496071	SNCA	1
GO:0055119	GO:0055119	relaxation of cardiac muscle	1/48	17/18723	0.0427181	0.0924293	0.0496071	PLN	1
GO:0070875	GO:0070875	positive regulation of glycogen metabolic process	1/48	17/18723	0.0427181	0.0924293	0.0496071	IGF1	1
GO:0090136	GO:0090136	epithelial cell-cell adhesion	1/48	17/18723	0.0427181	0.0924293	0.0496071	DSP	1
GO:0090494	GO:0090494	dopamine uptake	1/48	17/18723	0.0427181	0.0924293	0.0496071	SNCA	1
GO:0090713	GO:0090713	immunological memory process	1/48	17/18723	0.0427181	0.0924293	0.0496071	HLA-DRA	1
GO:1903358	GO:1903358	regulation of Golgi organization	1/48	17/18723	0.0427181	0.0924293	0.0496071	STX18	1
GO:0007093	GO:0007093	mitotic cell cycle checkpoint signaling	2/48	129/18723	0.0432437	0.0934833	0.0501728	CDK1/MUC1	2
GO:0006888	GO:0006888	endoplasmic reticulum to Golgi vesicle-mediated transport	2/48	130/18723	0.043849	0.0946236	0.0507848	STX18/LRRK2	2
GO:0015918	GO:0015918	sterol transport	2/48	130/18723	0.043849	0.0946236	0.0507848	APOA1/APOE	2
GO:0022604	GO:0022604	regulation of cell morphogenesis	3/48	309/18723	0.0446517	0.0952858	0.0511402	APOA1/CCL2/FN1	3
GO:0035264	GO:0035264	multicellular organism growth	2/48	132/18723	0.0450692	0.0952858	0.0511402	COMP/IGF1	2
GO:0045667	GO:0045667	regulation of osteoblast differentiation	2/48	132/18723	0.0450692	0.0952858	0.0511402	IGF1/IL6	2
GO:0001956	GO:0001956	positive regulation of neurotransmitter secretion	1/48	18/18723	0.0451745	0.0952858	0.0511402	SNCA	1
GO:0002295	GO:0002295	T-helper cell lineage commitment	1/48	18/18723	0.0451745	0.0952858	0.0511402	IL6	1
GO:0002501	GO:0002501	peptide antigen assembly with MHC protein complex	1/48	18/18723	0.0451745	0.0952858	0.0511402	HLA-DRA	1
GO:0002544	GO:0002544	chronic inflammatory response	1/48	18/18723	0.0451745	0.0952858	0.0511402	VCAM1	1
GO:0003417	GO:0003417	growth plate cartilage development	1/48	18/18723	0.0451745	0.0952858	0.0511402	COMP	1
GO:0015732	GO:0015732	prostaglandin transport	1/48	18/18723	0.0451745	0.0952858	0.0511402	MAP2K6	1
GO:0015936	GO:0015936	coenzyme A metabolic process	1/48	18/18723	0.0451745	0.0952858	0.0511402	HMGCR	1
GO:0030299	GO:0030299	intestinal cholesterol absorption	1/48	18/18723	0.0451745	0.0952858	0.0511402	APOA1	1
GO:0031000	GO:0031000	response to caffeine	1/48	18/18723	0.0451745	0.0952858	0.0511402	RYR2	1
GO:0032305	GO:0032305	positive regulation of icosanoid secretion	1/48	18/18723	0.0451745	0.0952858	0.0511402	MAP2K6	1
GO:0034162	GO:0034162	toll-like receptor 9 signaling pathway	1/48	18/18723	0.0451745	0.0952858	0.0511402	RSAD2	1
GO:0036499	GO:0036499	PERK-mediated unfolded protein response	1/48	18/18723	0.0451745	0.0952858	0.0511402	BOK	1
GO:0043217	GO:0043217	myelin maintenance	1/48	18/18723	0.0451745	0.0952858	0.0511402	NDRG1	1
GO:0046851	GO:0046851	negative regulation of bone remodeling	1/48	18/18723	0.0451745	0.0952858	0.0511402	IL6	1
GO:0048643	GO:0048643	positive regulation of skeletal muscle tissue development	1/48	18/18723	0.0451745	0.0952858	0.0511402	HMGCR	1
GO:0060192	GO:0060192	negative regulation of lipase activity	1/48	18/18723	0.0451745	0.0952858	0.0511402	APOA1	1
GO:0060546	GO:0060546	negative regulation of necroptotic process	1/48	18/18723	0.0451745	0.0952858	0.0511402	BOK	1
GO:0060602	GO:0060602	branch elongation of an epithelium	1/48	18/18723	0.0451745	0.0952858	0.0511402	ESR1	1
GO:0060749	GO:0060749	mammary gland alveolus development	1/48	18/18723	0.0451745	0.0952858	0.0511402	ESR1	1
GO:0061377	GO:0061377	mammary gland lobule development	1/48	18/18723	0.0451745	0.0952858	0.0511402	ESR1	1
GO:0090493	GO:0090493	catecholamine uptake	1/48	18/18723	0.0451745	0.0952858	0.0511402	SNCA	1
GO:0150079	GO:0150079	negative regulation of neuroinflammatory response	1/48	18/18723	0.0451745	0.0952858	0.0511402	IGF1	1
GO:1900242	GO:1900242	regulation of synaptic vesicle endocytosis	1/48	18/18723	0.0451745	0.0952858	0.0511402	LRRK2	1
GO:0010565	GO:0010565	regulation of cellular ketone metabolic process	2/48	133/18723	0.045684	0.0961934	0.0516274	SNCA/APOA1	2
GO:1903052	GO:1903052	positive regulation of proteolysis involved in cellular protein catabolic process	2/48	133/18723	0.045684	0.0961934	0.0516274	LRRK2/NUPR1	2
GO:0045787	GO:0045787	positive regulation of cell cycle	3/48	313/18723	0.0460894	0.0969631	0.0520404	CDK1/NUPR1/IGF1	3
GO:0008277	GO:0008277	regulation of G protein-coupled receptor signaling pathway	2/48	134/18723	0.0463019	0.097242	0.0521901	SNCA/CXCL8	2
GO:0032147	GO:0032147	activation of protein kinase activity	2/48	134/18723	0.0463019	0.097242	0.0521901	TXN/IGF1	2
GO:0046394	GO:0046394	carboxylic acid biosynthetic process	3/48	314/18723	0.0464524	0.0974738	0.0523146	PTGIS/APOA1/XBP1	3
GO:0002687	GO:0002687	positive regulation of leukocyte migration	2/48	135/18723	0.0469229	0.0977413	0.0524581	IL6/CXCL8	2
GO:0042157	GO:0042157	lipoprotein metabolic process	2/48	135/18723	0.0469229	0.0977413	0.0524581	APOA1/APOE	2
GO:0016053	GO:0016053	organic acid biosynthetic process	3/48	316/18723	0.0471827	0.0977413	0.0524581	PTGIS/APOA1/XBP1	3
GO:0043401	GO:0043401	steroid hormone mediated signaling pathway	2/48	136/18723	0.047547	0.0977413	0.0524581	ESR1/NR3C2	2
GO:1903305	GO:1903305	regulation of regulated secretory pathway	2/48	136/18723	0.047547	0.0977413	0.0524581	HMOX1/LRRK2	2
GO:0002396	GO:0002396	MHC protein complex assembly	1/48	19/18723	0.0476248	0.0977413	0.0524581	HLA-DRA	1
GO:0002483	GO:0002483	antigen processing and presentation of endogenous peptide antigen	1/48	19/18723	0.0476248	0.0977413	0.0524581	HLA-DRA	1
GO:0006309	GO:0006309	apoptotic DNA fragmentation	1/48	19/18723	0.0476248	0.0977413	0.0524581	IL6	1
GO:0006743	GO:0006743	ubiquinone metabolic process	1/48	19/18723	0.0476248	0.0977413	0.0524581	HMGCR	1
GO:0006977	GO:0006977	DNA damage response, signal transduction by p53 class mediator resulting in cell cycle arrest	1/48	19/18723	0.0476248	0.0977413	0.0524581	MUC1	1
GO:0010544	GO:0010544	negative regulation of platelet activation	1/48	19/18723	0.0476248	0.0977413	0.0524581	APOE	1
GO:0010738	GO:0010738	regulation of protein kinase A signaling	1/48	19/18723	0.0476248	0.0977413	0.0524581	LRRK2	1
GO:0016082	GO:0016082	synaptic vesicle priming	1/48	19/18723	0.0476248	0.0977413	0.0524581	SNCA	1
GO:0031065	GO:0031065	positive regulation of histone deacetylation	1/48	19/18723	0.0476248	0.0977413	0.0524581	LRRK2	1
GO:0032026	GO:0032026	response to magnesium ion	1/48	19/18723	0.0476248	0.0977413	0.0524581	SNCA	1
GO:0034501	GO:0034501	protein localization to kinetochore	1/48	19/18723	0.0476248	0.0977413	0.0524581	CDK1	1
GO:0036498	GO:0036498	IRE1-mediated unfolded protein response	1/48	19/18723	0.0476248	0.0977413	0.0524581	XBP1	1
GO:0045091	GO:0045091	regulation of single stranded viral RNA replication via double stranded DNA intermediate	1/48	19/18723	0.0476248	0.0977413	0.0524581	CXCL8	1
GO:0045821	GO:0045821	positive regulation of glycolytic process	1/48	19/18723	0.0476248	0.0977413	0.0524581	IGF1	1
GO:0046716	GO:0046716	muscle cell cellular homeostasis	1/48	19/18723	0.0476248	0.0977413	0.0524581	DMD	1
GO:0048245	GO:0048245	eosinophil chemotaxis	1/48	19/18723	0.0476248	0.0977413	0.0524581	CCL2	1
GO:0060065	GO:0060065	uterus development	1/48	19/18723	0.0476248	0.0977413	0.0524581	ESR1	1
GO:0086014	GO:0086014	atrial cardiac muscle cell action potential	1/48	19/18723	0.0476248	0.0977413	0.0524581	RYR2	1
GO:0086026	GO:0086026	atrial cardiac muscle cell to AV node cell signaling	1/48	19/18723	0.0476248	0.0977413	0.0524581	RYR2	1
GO:0086066	GO:0086066	atrial cardiac muscle cell to AV node cell communication	1/48	19/18723	0.0476248	0.0977413	0.0524581	RYR2	1
GO:1903083	GO:1903083	protein localization to condensed chromosome	1/48	19/18723	0.0476248	0.0977413	0.0524581	CDK1	1
GO:0070661	GO:0070661	leukocyte proliferation	3/48	318/18723	0.0479187	0.0982617	0.0527374	VCAM1/IGF1/IL6	3
GO:0007266	GO:0007266	Rho protein signal transduction	2/48	137/18723	0.0481742	0.0984535	0.0528403	APOA1/APOE	2
GO:0010977	GO:0010977	negative regulation of neuron projection development	2/48	137/18723	0.0481742	0.0984535	0.0528403	LRRK2/APOE	2
GO:0030879	GO:0030879	mammary gland development	2/48	137/18723	0.0481742	0.0984535	0.0528403	ESR1/XBP1	2
GO:0060078	GO:0060078	regulation of postsynaptic membrane potential	2/48	137/18723	0.0481742	0.0984535	0.0528403	SNCA/LRRK2	2
GO:0055076	GO:0055076	transition metal ion homeostasis	2/48	138/18723	0.0488044	0.0996578	0.0534867	HMOX1/CP	2
GO:0045598	GO:0045598	regulation of fat cell differentiation	2/48	139/18723	0.0494377	0.100645	0.0540163	XBP1/IL6	2
GO:0001832	GO:0001832	blastocyst growth	1/48	20/18723	0.0500689	0.100645	0.0540163	IGF1	1
GO:0006837	GO:0006837	serotonin transport	1/48	20/18723	0.0500689	0.100645	0.0540163	SNCA	1
GO:0009713	GO:0009713	catechol-containing compound biosynthetic process	1/48	20/18723	0.0500689	0.100645	0.0540163	SNCA	1
GO:0010042	GO:0010042	response to manganese ion	1/48	20/18723	0.0500689	0.100645	0.0540163	LRRK2	1
GO:0014047	GO:0014047	glutamate secretion	1/48	20/18723	0.0500689	0.100645	0.0540163	SNCA	1
GO:0034104	GO:0034104	negative regulation of tissue remodeling	1/48	20/18723	0.0500689	0.100645	0.0540163	IL6	1
GO:0039692	GO:0039692	single stranded viral RNA replication via double stranded DNA intermediate	1/48	20/18723	0.0500689	0.100645	0.0540163	CXCL8	1
GO:0042423	GO:0042423	catecholamine biosynthetic process	1/48	20/18723	0.0500689	0.100645	0.0540163	SNCA	1
GO:0045844	GO:0045844	positive regulation of striated muscle tissue development	1/48	20/18723	0.0500689	0.100645	0.0540163	HMGCR	1
GO:0048636	GO:0048636	positive regulation of muscle organ development	1/48	20/18723	0.0500689	0.100645	0.0540163	HMGCR	1
GO:0051004	GO:0051004	regulation of lipoprotein lipase activity	1/48	20/18723	0.0500689	0.100645	0.0540163	APOA1	1
GO:0060252	GO:0060252	positive regulation of glial cell proliferation	1/48	20/18723	0.0500689	0.100645	0.0540163	IL6	1
GO:0071243	GO:0071243	cellular response to arsenic-containing substance	1/48	20/18723	0.0500689	0.100645	0.0540163	HMOX1	1
GO:0071731	GO:0071731	response to nitric oxide	1/48	20/18723	0.0500689	0.100645	0.0540163	TXN	1
GO:0090201	GO:0090201	negative regulation of release of cytochrome c from mitochondria	1/48	20/18723	0.0500689	0.100645	0.0540163	IGF1	1
GO:1904292	GO:1904292	regulation of ERAD pathway	1/48	20/18723	0.0500689	0.100645	0.0540163	AQP11	1
GO:2000757	GO:2000757	negative regulation of peptidyl-lysine acetylation	1/48	20/18723	0.0500689	0.100645	0.0540163	SNCA	1
GO:0015748	GO:0015748	organophosphate ester transport	2/48	140/18723	0.050074	0.100645	0.0540163	APOA1/APOE	2
GO:0034341	GO:0034341	response to interferon-gamma	2/48	141/18723	0.0507132	0.101677	0.0545706	SNCA/CCL2	2
GO:0048284	GO:0048284	organelle fusion	2/48	141/18723	0.0507132	0.101677	0.0545706	SNCA/CDK1	2
GO:0050921	GO:0050921	positive regulation of chemotaxis	2/48	141/18723	0.0507132	0.101677	0.0545706	IL6/CXCL8	2
GO:2000045	GO:2000045	regulation of G1/S transition of mitotic cell cycle	2/48	142/18723	0.0513554	0.10288	0.0552161	CCL2/MUC1	2
GO:0002689	GO:0002689	negative regulation of leukocyte chemotaxis	1/48	21/18723	0.0525068	0.103734	0.0556744	CCL2	1
GO:0006925	GO:0006925	inflammatory cell apoptotic process	1/48	21/18723	0.0525068	0.103734	0.0556744	IL6	1
GO:0032303	GO:0032303	regulation of icosanoid secretion	1/48	21/18723	0.0525068	0.103734	0.0556744	MAP2K6	1
GO:0043373	GO:0043373	CD4-positive, alpha-beta T cell lineage commitment	1/48	21/18723	0.0525068	0.103734	0.0556744	IL6	1
GO:0044241	GO:0044241	lipid digestion	1/48	21/18723	0.0525068	0.103734	0.0556744	APOA1	1
GO:0044342	GO:0044342	type B pancreatic cell proliferation	1/48	21/18723	0.0525068	0.103734	0.0556744	NUPR1	1
GO:0046514	GO:0046514	ceramide catabolic process	1/48	21/18723	0.0525068	0.103734	0.0556744	GLA	1
GO:0046823	GO:0046823	negative regulation of nucleocytoplasmic transport	1/48	21/18723	0.0525068	0.103734	0.0556744	TXN	1
GO:0050849	GO:0050849	negative regulation of calcium-mediated signaling	1/48	21/18723	0.0525068	0.103734	0.0556744	ITPR1	1
GO:0097062	GO:0097062	dendritic spine maintenance	1/48	21/18723	0.0525068	0.103734	0.0556744	APOE	1
GO:0098856	GO:0098856	intestinal lipid absorption	1/48	21/18723	0.0525068	0.103734	0.0556744	APOA1	1
GO:0150105	GO:0150105	protein localization to cell-cell junction	1/48	21/18723	0.0525068	0.103734	0.0556744	DSP	1
GO:1901028	GO:1901028	regulation of mitochondrial outer membrane permeabilization involved in apoptotic signaling pathway	1/48	21/18723	0.0525068	0.103734	0.0556744	BOK	1
GO:1901863	GO:1901863	positive regulation of muscle tissue development	1/48	21/18723	0.0525068	0.103734	0.0556744	HMGCR	1
GO:1902254	GO:1902254	negative regulation of intrinsic apoptotic signaling pathway by p53 class mediator	1/48	21/18723	0.0525068	0.103734	0.0556744	MUC1	1
GO:1902307	GO:1902307	positive regulation of sodium ion transmembrane transport	1/48	21/18723	0.0525068	0.103734	0.0556744	DMD	1
GO:1903429	GO:1903429	regulation of cell maturation	1/48	21/18723	0.0525068	0.103734	0.0556744	LRRK2	1
GO:0014065	GO:0014065	phosphatidylinositol 3-kinase signaling	2/48	144/18723	0.0526488	0.10393	0.0557796	FN1/IGF1	2
GO:0019216	GO:0019216	regulation of lipid metabolic process	3/48	331/18723	0.0528414	0.104226	0.0559383	SNCA/APOA1/APOE	3
GO:0007269	GO:0007269	neurotransmitter secretion	2/48	145/18723	0.0532998	0.10496	0.0563322	SNCA/LRRK2	2
GO:0099643	GO:0099643	signal release from synapse	2/48	145/18723	0.0532998	0.10496	0.0563322	SNCA/LRRK2	2
GO:0045580	GO:0045580	regulation of T cell differentiation	2/48	146/18723	0.0539537	0.106161	0.0569772	XBP1/HLA-DRA	2
GO:0042113	GO:0042113	B cell activation	3/48	334/18723	0.0540111	0.106188	0.0569917	VCAM1/XBP1/IL6	3
GO:0006662	GO:0006662	glycerol ether metabolic process	1/48	22/18723	0.0549386	0.106633	0.0572301	TXN	1
GO:0008211	GO:0008211	glucocorticoid metabolic process	1/48	22/18723	0.0549386	0.106633	0.0572301	APOA1	1
GO:0010310	GO:0010310	regulation of hydrogen peroxide metabolic process	1/48	22/18723	0.0549386	0.106633	0.0572301	SNCA	1
GO:0016137	GO:0016137	glycoside metabolic process	1/48	22/18723	0.0549386	0.106633	0.0572301	GLA	1
GO:0035357	GO:0035357	peroxisome proliferator activated receptor signaling pathway	1/48	22/18723	0.0549386	0.106633	0.0572301	PTGIS	1
GO:0045540	GO:0045540	regulation of cholesterol biosynthetic process	1/48	22/18723	0.0549386	0.106633	0.0572301	APOE	1
GO:0048169	GO:0048169	regulation of long-term neuronal synaptic plasticity	1/48	22/18723	0.0549386	0.106633	0.0572301	SNCA	1
GO:0060444	GO:0060444	branching involved in mammary gland duct morphogenesis	1/48	22/18723	0.0549386	0.106633	0.0572301	ESR1	1
GO:0061042	GO:0061042	vascular wound healing	1/48	22/18723	0.0549386	0.106633	0.0572301	XBP1	1
GO:0090280	GO:0090280	positive regulation of calcium ion import	1/48	22/18723	0.0549386	0.106633	0.0572301	CCL2	1
GO:0106118	GO:0106118	regulation of sterol biosynthetic process	1/48	22/18723	0.0549386	0.106633	0.0572301	APOE	1
GO:0140467	GO:0140467	integrated stress response signaling	1/48	22/18723	0.0549386	0.106633	0.0572301	BOK	1
GO:1900543	GO:1900543	negative regulation of purine nucleotide metabolic process	1/48	22/18723	0.0549386	0.106633	0.0572301	NUPR1	1
GO:1901522	GO:1901522	positive regulation of transcription from RNA polymerase II promoter involved in cellular response to chemical stimulus	1/48	22/18723	0.0549386	0.106633	0.0572301	XBP1	1
GO:1903589	GO:1903589	positive regulation of blood vessel endothelial cell proliferation involved in sprouting angiogenesis	1/48	22/18723	0.0549386	0.106633	0.0572301	HMOX1	1
GO:2000193	GO:2000193	positive regulation of fatty acid transport	1/48	22/18723	0.0549386	0.106633	0.0572301	MAP2K6	1
GO:0007265	GO:0007265	Ras protein signal transduction	3/48	337/18723	0.0551934	0.107042	0.0574497	APOA1/APOE/IGF1	3
GO:0097530	GO:0097530	granulocyte migration	2/48	148/18723	0.0552702	0.107105	0.0574838	CCL2/CXCL8	2
GO:0001655	GO:0001655	urogenital system development	3/48	338/18723	0.0555903	0.10764	0.0577707	ESR1/AQP11/LRRK2	3
GO:0045834	GO:0045834	positive regulation of lipid metabolic process	2/48	149/18723	0.0559327	0.108217	0.0580803	APOA1/APOE	2
GO:0048545	GO:0048545	response to steroid hormone	3/48	339/18723	0.0559886	0.108239	0.0580921	ESR1/NR3C2/IL6	3
GO:0001959	GO:0001959	regulation of cytokine-mediated signaling pathway	2/48	150/18723	0.0565981	0.108399	0.0581783	APOA1/IL6	2
GO:0043535	GO:0043535	regulation of blood vessel endothelial cell migration	2/48	151/18723	0.0572662	0.108399	0.0581783	HMOX1/APOE	2
GO:0044409	GO:0044409	entry into host	2/48	151/18723	0.0572662	0.108399	0.0581783	CDK1/CXCL8	2
GO:0055067	GO:0055067	monovalent inorganic cation homeostasis	2/48	151/18723	0.0572662	0.108399	0.0581783	AQP11/LRRK2	2
GO:0071333	GO:0071333	cellular response to glucose stimulus	2/48	151/18723	0.0572662	0.108399	0.0581783	XBP1/HMGCR	2
GO:2001236	GO:2001236	regulation of extrinsic apoptotic signaling pathway	2/48	151/18723	0.0572662	0.108399	0.0581783	HMOX1/IGF1	2
GO:0001919	GO:0001919	regulation of receptor recycling	1/48	23/18723	0.0573643	0.108399	0.0581783	SNCA	1
GO:0002363	GO:0002363	alpha-beta T cell lineage commitment	1/48	23/18723	0.0573643	0.108399	0.0581783	IL6	1
GO:0006833	GO:0006833	water transport	1/48	23/18723	0.0573643	0.108399	0.0581783	AQP11	1
GO:0006929	GO:0006929	substrate-dependent cell migration	1/48	23/18723	0.0573643	0.108399	0.0581783	FN1	1
GO:0010640	GO:0010640	regulation of platelet-derived growth factor receptor signaling pathway	1/48	23/18723	0.0573643	0.108399	0.0581783	SNCA	1
GO:0010804	GO:0010804	negative regulation of tumor necrosis factor-mediated signaling pathway	1/48	23/18723	0.0573643	0.108399	0.0581783	APOA1	1
GO:0010888	GO:0010888	negative regulation of lipid storage	1/48	23/18723	0.0573643	0.108399	0.0581783	IL6	1
GO:0021544	GO:0021544	subpallium development	1/48	23/18723	0.0573643	0.108399	0.0581783	LRRK2	1
GO:0030325	GO:0030325	adrenal gland development	1/48	23/18723	0.0573643	0.108399	0.0581783	APOA1	1
GO:0031338	GO:0031338	regulation of vesicle fusion	1/48	23/18723	0.0573643	0.108399	0.0581783	SNCA	1
GO:0032740	GO:0032740	positive regulation of interleukin-17 production	1/48	23/18723	0.0573643	0.108399	0.0581783	IL6	1
GO:0035988	GO:0035988	chondrocyte proliferation	1/48	23/18723	0.0573643	0.108399	0.0581783	COMP	1
GO:0043369	GO:0043369	CD4-positive or CD8-positive, alpha-beta T cell lineage commitment	1/48	23/18723	0.0573643	0.108399	0.0581783	IL6	1
GO:0043931	GO:0043931	ossification involved in bone maturation	1/48	23/18723	0.0573643	0.108399	0.0581783	IGF1	1
GO:0045723	GO:0045723	positive regulation of fatty acid biosynthetic process	1/48	23/18723	0.0573643	0.108399	0.0581783	APOA1	1
GO:0045980	GO:0045980	negative regulation of nucleotide metabolic process	1/48	23/18723	0.0573643	0.108399	0.0581783	NUPR1	1
GO:0051457	GO:0051457	maintenance of protein location in nucleus	1/48	23/18723	0.0573643	0.108399	0.0581783	TXN	1
GO:0051590	GO:0051590	positive regulation of neurotransmitter transport	1/48	23/18723	0.0573643	0.108399	0.0581783	SNCA	1
GO:0060384	GO:0060384	innervation	1/48	23/18723	0.0573643	0.108399	0.0581783	VCAM1	1
GO:0061050	GO:0061050	regulation of cell growth involved in cardiac muscle cell development	1/48	23/18723	0.0573643	0.108399	0.0581783	IGF1	1
GO:0072677	GO:0072677	eosinophil migration	1/48	23/18723	0.0573643	0.108399	0.0581783	CCL2	1
GO:0090208	GO:0090208	positive regulation of triglyceride metabolic process	1/48	23/18723	0.0573643	0.108399	0.0581783	APOA1	1
GO:1903306	GO:1903306	negative regulation of regulated secretory pathway	1/48	23/18723	0.0573643	0.108399	0.0581783	HMOX1	1
GO:0008643	GO:0008643	carbohydrate transport	2/48	152/18723	0.0579372	0.109143	0.0585773	AQP11/IGF1	2
GO:0016573	GO:0016573	histone acetylation	2/48	152/18723	0.0579372	0.109143	0.0585773	SNCA/MUC1	2
GO:0050871	GO:0050871	positive regulation of B cell activation	2/48	152/18723	0.0579372	0.109143	0.0585773	XBP1/IL6	2
GO:0098754	GO:0098754	detoxification	2/48	152/18723	0.0579372	0.109143	0.0585773	TXN/APOE	2
GO:0030336	GO:0030336	negative regulation of cell migration	3/48	344/18723	0.0580006	0.109178	0.058596	HMOX1/CCL2/APOE	3
GO:0007338	GO:0007338	single fertilization	2/48	153/18723	0.0586109	0.110156	0.059121	UBXN8/CDK1	2
GO:0071331	GO:0071331	cellular response to hexose stimulus	2/48	153/18723	0.0586109	0.110156	0.059121	XBP1/HMGCR	2
GO:0008360	GO:0008360	regulation of cell shape	2/48	154/18723	0.0592873	0.110988	0.0595677	CCL2/FN1	2
GO:0016052	GO:0016052	carbohydrate catabolic process	2/48	154/18723	0.0592873	0.110988	0.0595677	NUPR1/IGF1	2
GO:0071326	GO:0071326	cellular response to monosaccharide stimulus	2/48	154/18723	0.0592873	0.110988	0.0595677	XBP1/HMGCR	2
GO:0002021	GO:0002021	response to dietary excess	1/48	24/18723	0.0597839	0.110988	0.0595677	APOE	1
GO:0036003	GO:0036003	positive regulation of transcription from RNA polymerase II promoter in response to stress	1/48	24/18723	0.0597839	0.110988	0.0595677	MUC1	1
GO:0043567	GO:0043567	regulation of insulin-like growth factor receptor signaling pathway	1/48	24/18723	0.0597839	0.110988	0.0595677	IGF1	1
GO:0048641	GO:0048641	regulation of skeletal muscle tissue development	1/48	24/18723	0.0597839	0.110988	0.0595677	HMGCR	1
GO:0051000	GO:0051000	positive regulation of nitric-oxide synthase activity	1/48	24/18723	0.0597839	0.110988	0.0595677	APOE	1
GO:0051043	GO:0051043	regulation of membrane protein ectodomain proteolysis	1/48	24/18723	0.0597839	0.110988	0.0595677	APOE	1
GO:0051123	GO:0051123	RNA polymerase II preinitiation complex assembly	1/48	24/18723	0.0597839	0.110988	0.0595677	ESR1	1
GO:0071676	GO:0071676	negative regulation of mononuclear cell migration	1/48	24/18723	0.0597839	0.110988	0.0595677	CCL2	1
GO:0090023	GO:0090023	positive regulation of neutrophil chemotaxis	1/48	24/18723	0.0597839	0.110988	0.0595677	CXCL8	1
GO:1901984	GO:1901984	negative regulation of protein acetylation	1/48	24/18723	0.0597839	0.110988	0.0595677	SNCA	1
GO:2000310	GO:2000310	regulation of NMDA receptor activity	1/48	24/18723	0.0597839	0.110988	0.0595677	CCL2	1
GO:2000353	GO:2000353	positive regulation of endothelial cell apoptotic process	1/48	24/18723	0.0597839	0.110988	0.0595677	CCL2	1
GO:2000679	GO:2000679	positive regulation of transcription regulatory region DNA binding	1/48	24/18723	0.0597839	0.110988	0.0595677	IGF1	1
GO:0006606	GO:0006606	protein import into nucleus	2/48	155/18723	0.0599665	0.111157	0.0596586	LRRK2/CDK1	2
GO:0051147	GO:0051147	regulation of muscle cell differentiation	2/48	155/18723	0.0599665	0.111157	0.0596586	XBP1/IGF1	2
GO:0006887	GO:0006887	exocytosis	3/48	352/18723	0.0612911	0.113052	0.0606756	SNCA/HMOX1/LRRK2	3
GO:0002262	GO:0002262	myeloid cell homeostasis	2/48	157/18723	0.061333	0.113052	0.0606756	HMOX1/IL6	2
GO:1902107	GO:1902107	positive regulation of leukocyte differentiation	2/48	157/18723	0.061333	0.113052	0.0606756	XBP1/HLA-DRA	2
GO:1903708	GO:1903708	positive regulation of hemopoiesis	2/48	157/18723	0.061333	0.113052	0.0606756	XBP1/HLA-DRA	2
GO:0018393	GO:0018393	internal peptidyl-lysine acetylation	2/48	158/18723	0.0620203	0.113052	0.0606756	SNCA/MUC1	2
GO:0010560	GO:0010560	positive regulation of glycoprotein biosynthetic process	1/48	25/18723	0.0621974	0.113052	0.0606756	IGF1	1
GO:0015874	GO:0015874	norepinephrine transport	1/48	25/18723	0.0621974	0.113052	0.0606756	SNCA	1
GO:0032469	GO:0032469	endoplasmic reticulum calcium ion homeostasis	1/48	25/18723	0.0621974	0.113052	0.0606756	ITPR1	1
GO:0033622	GO:0033622	integrin activation	1/48	25/18723	0.0621974	0.113052	0.0606756	FN1	1
GO:0045822	GO:0045822	negative regulation of heart contraction	1/48	25/18723	0.0621974	0.113052	0.0606756	PLN	1
GO:0046039	GO:0046039	GTP metabolic process	1/48	25/18723	0.0621974	0.113052	0.0606756	LRRK2	1
GO:0048143	GO:0048143	astrocyte activation	1/48	25/18723	0.0621974	0.113052	0.0606756	IL6	1
GO:0050927	GO:0050927	positive regulation of positive chemotaxis	1/48	25/18723	0.0621974	0.113052	0.0606756	CXCL8	1
GO:0051450	GO:0051450	myoblast proliferation	1/48	25/18723	0.0621974	0.113052	0.0606756	IGF1	1
GO:0060261	GO:0060261	positive regulation of transcription initiation from RNA polymerase II promoter	1/48	25/18723	0.0621974	0.113052	0.0606756	ESR1	1
GO:0060740	GO:0060740	prostate gland epithelium morphogenesis	1/48	25/18723	0.0621974	0.113052	0.0606756	ESR1	1
GO:0070423	GO:0070423	nucleotide-binding oligomerization domain containing signaling pathway	1/48	25/18723	0.0621974	0.113052	0.0606756	MAP2K6	1
GO:0071459	GO:0071459	protein localization to chromosome, centromeric region	1/48	25/18723	0.0621974	0.113052	0.0606756	CDK1	1
GO:0086064	GO:0086064	cell communication by electrical coupling involved in cardiac conduction	1/48	25/18723	0.0621974	0.113052	0.0606756	RYR2	1
GO:0090312	GO:0090312	positive regulation of protein deacetylation	1/48	25/18723	0.0621974	0.113052	0.0606756	LRRK2	1
GO:0090330	GO:0090330	regulation of platelet aggregation	1/48	25/18723	0.0621974	0.113052	0.0606756	IL6	1
GO:1901623	GO:1901623	regulation of lymphocyte chemotaxis	1/48	25/18723	0.0621974	0.113052	0.0606756	CCL2	1
GO:1902932	GO:1902932	positive regulation of alcohol biosynthetic process	1/48	25/18723	0.0621974	0.113052	0.0606756	SNCA	1
GO:1903055	GO:1903055	positive regulation of extracellular matrix organization	1/48	25/18723	0.0621974	0.113052	0.0606756	IL6	1
GO:1904996	GO:1904996	positive regulation of leukocyte adhesion to vascular endothelial cell	1/48	25/18723	0.0621974	0.113052	0.0606756	IL6	1
GO:1905563	GO:1905563	negative regulation of vascular endothelial cell proliferation	1/48	25/18723	0.0621974	0.113052	0.0606756	CCL2	1
GO:0051170	GO:0051170	import into nucleus	2/48	159/18723	0.0627103	0.113899	0.0611303	LRRK2/CDK1	2
GO:0010631	GO:0010631	epithelial cell migration	3/48	357/18723	0.0633916	0.1149	0.0616672	APOA1/HMOX1/APOE	3
GO:0006475	GO:0006475	internal protein amino acid acetylation	2/48	160/18723	0.0634029	0.1149	0.0616672	SNCA/MUC1	2
GO:0043271	GO:0043271	negative regulation of ion transport	2/48	160/18723	0.0634029	0.1149	0.0616672	SNCA/PLN	2
GO:0003205	GO:0003205	cardiac chamber development	2/48	161/18723	0.0640981	0.115359	0.0619136	RYR2/DSP	2
GO:0051650	GO:0051650	establishment of vesicle localization	2/48	161/18723	0.0640981	0.115359	0.0619136	SNCA/LRRK2	2
GO:1901653	GO:1901653	cellular response to peptide	3/48	359/18723	0.0642412	0.115359	0.0619136	VCAM1/XBP1/IGF1	3
GO:2000146	GO:2000146	negative regulation of cell motility	3/48	359/18723	0.0642412	0.115359	0.0619136	HMOX1/CCL2/APOE	3
GO:0001963	GO:0001963	synaptic transmission, dopaminergic	1/48	26/18723	0.0646049	0.115359	0.0619136	SNCA	1
GO:0003416	GO:0003416	endochondral bone growth	1/48	26/18723	0.0646049	0.115359	0.0619136	COMP	1
GO:0009435	GO:0009435	NAD biosynthetic process	1/48	26/18723	0.0646049	0.115359	0.0619136	PTGIS	1
GO:0014829	GO:0014829	vascular associated smooth muscle contraction	1/48	26/18723	0.0646049	0.115359	0.0619136	COMP	1
GO:0019883	GO:0019883	antigen processing and presentation of endogenous antigen	1/48	26/18723	0.0646049	0.115359	0.0619136	HLA-DRA	1
GO:0032682	GO:0032682	negative regulation of chemokine production	1/48	26/18723	0.0646049	0.115359	0.0619136	IL6	1
GO:0033598	GO:0033598	mammary gland epithelial cell proliferation	1/48	26/18723	0.0646049	0.115359	0.0619136	ESR1	1
GO:0034114	GO:0034114	regulation of heterotypic cell-cell adhesion	1/48	26/18723	0.0646049	0.115359	0.0619136	APOA1	1
GO:0035872	GO:0035872	nucleotide-binding domain, leucine rich repeat containing receptor signaling pathway	1/48	26/18723	0.0646049	0.115359	0.0619136	MAP2K6	1
GO:0050926	GO:0050926	regulation of positive chemotaxis	1/48	26/18723	0.0646049	0.115359	0.0619136	CXCL8	1
GO:0060544	GO:0060544	regulation of necroptotic process	1/48	26/18723	0.0646049	0.115359	0.0619136	BOK	1
GO:0070102	GO:0070102	interleukin-6-mediated signaling pathway	1/48	26/18723	0.0646049	0.115359	0.0619136	IL6	1
GO:0070977	GO:0070977	bone maturation	1/48	26/18723	0.0646049	0.115359	0.0619136	IGF1	1
GO:0071880	GO:0071880	adenylate cyclase-activating adrenergic receptor signaling pathway	1/48	26/18723	0.0646049	0.115359	0.0619136	PLN	1
GO:1900017	GO:1900017	positive regulation of cytokine production involved in inflammatory response	1/48	26/18723	0.0646049	0.115359	0.0619136	IL6	1
GO:1903523	GO:1903523	negative regulation of blood circulation	1/48	26/18723	0.0646049	0.115359	0.0619136	PLN	1
GO:0090132	GO:0090132	epithelium migration	3/48	360/18723	0.0646681	0.115387	0.0619287	APOA1/HMOX1/APOE	3
GO:0060759	GO:0060759	regulation of response to cytokine stimulus	2/48	162/18723	0.064796	0.115531	0.0620057	APOA1/IL6	2
GO:0061025	GO:0061025	membrane fusion	2/48	163/18723	0.0654964	0.116694	0.0626301	SNCA/STX18	2
GO:0031589	GO:0031589	cell-substrate adhesion	3/48	363/18723	0.0659565	0.117428	0.0630239	VCAM1/APOA1/FN1	3
GO:0090130	GO:0090130	tissue migration	3/48	365/18723	0.0668221	0.117916	0.0632857	APOA1/HMOX1/APOE	3
GO:0032635	GO:0032635	interleukin-6 production	2/48	165/18723	0.066905	0.117916	0.0632857	XBP1/IL6	2
GO:0032675	GO:0032675	regulation of interleukin-6 production	2/48	165/18723	0.066905	0.117916	0.0632857	XBP1/IL6	2
GO:0050796	GO:0050796	regulation of insulin secretion	2/48	165/18723	0.066905	0.117916	0.0632857	HMGCR/IL6	2
GO:0000737	GO:0000737	DNA catabolic process, endonucleolytic	1/48	27/18723	0.0670063	0.117916	0.0632857	IL6	1
GO:0003401	GO:0003401	axis elongation	1/48	27/18723	0.0670063	0.117916	0.0632857	ESR1	1
GO:0007263	GO:0007263	nitric oxide mediated signal transduction	1/48	27/18723	0.0670063	0.117916	0.0632857	APOE	1
GO:0010894	GO:0010894	negative regulation of steroid biosynthetic process	1/48	27/18723	0.0670063	0.117916	0.0632857	APOE	1
GO:0010971	GO:0010971	positive regulation of G2/M transition of mitotic cell cycle	1/48	27/18723	0.0670063	0.117916	0.0632857	CDK1	1
GO:0014850	GO:0014850	response to muscle activity	1/48	27/18723	0.0670063	0.117916	0.0632857	RYR2	1
GO:0018904	GO:0018904	ether metabolic process	1/48	27/18723	0.0670063	0.117916	0.0632857	TXN	1
GO:0032781	GO:0032781	positive regulation of ATPase activity	1/48	27/18723	0.0670063	0.117916	0.0632857	DNAJC10	1
GO:0042104	GO:0042104	positive regulation of activated T cell proliferation	1/48	27/18723	0.0670063	0.117916	0.0632857	IGF1	1
GO:0051953	GO:0051953	negative regulation of amine transport	1/48	27/18723	0.0670063	0.117916	0.0632857	SNCA	1
GO:0060512	GO:0060512	prostate gland morphogenesis	1/48	27/18723	0.0670063	0.117916	0.0632857	ESR1	1
GO:0071624	GO:0071624	positive regulation of granulocyte chemotaxis	1/48	27/18723	0.0670063	0.117916	0.0632857	CXCL8	1
GO:0030307	GO:0030307	positive regulation of cell growth	2/48	166/18723	0.0676131	0.118866	0.0637958	FN1/IGF1	2
GO:0009615	GO:0009615	response to virus	3/48	367/18723	0.067693	0.118866	0.0637958	RSAD2/MX1/IL6	3
GO:0051271	GO:0051271	negative regulation of cellular component movement	3/48	367/18723	0.067693	0.118866	0.0637958	HMOX1/CCL2/APOE	3
GO:0007254	GO:0007254	JNK cascade	2/48	167/18723	0.0683237	0.119801	0.0642974	LRRK2/MAP3K5	2
GO:1902904	GO:1902904	negative regulation of supramolecular fiber organization	2/48	167/18723	0.0683237	0.119801	0.0642974	SNCA/APOE	2
GO:1902806	GO:1902806	regulation of cell cycle G1/S phase transition	2/48	168/18723	0.0690369	0.120131	0.064475	CCL2/MUC1	2
GO:0002675	GO:0002675	positive regulation of acute inflammatory response	1/48	28/18723	0.0694016	0.120131	0.064475	IL6	1
GO:0007271	GO:0007271	synaptic transmission, cholinergic	1/48	28/18723	0.0694016	0.120131	0.064475	APOE	1
GO:0008299	GO:0008299	isoprenoid biosynthetic process	1/48	28/18723	0.0694016	0.120131	0.064475	HMGCR	1
GO:0010460	GO:0010460	positive regulation of heart rate	1/48	28/18723	0.0694016	0.120131	0.064475	RYR2	1
GO:0010575	GO:0010575	positive regulation of vascular endothelial growth factor production	1/48	28/18723	0.0694016	0.120131	0.064475	IL6	1
GO:0030262	GO:0030262	apoptotic nuclear changes	1/48	28/18723	0.0694016	0.120131	0.064475	IL6	1
GO:0032801	GO:0032801	receptor catabolic process	1/48	28/18723	0.0694016	0.120131	0.064475	APOE	1
GO:0032958	GO:0032958	inositol phosphate biosynthetic process	1/48	28/18723	0.0694016	0.120131	0.064475	SNCA	1
GO:0034123	GO:0034123	positive regulation of toll-like receptor signaling pathway	1/48	28/18723	0.0694016	0.120131	0.064475	RSAD2	1
GO:0045589	GO:0045589	regulation of regulatory T cell differentiation	1/48	28/18723	0.0694016	0.120131	0.064475	HLA-DRA	1
GO:0050996	GO:0050996	positive regulation of lipid catabolic process	1/48	28/18723	0.0694016	0.120131	0.064475	APOA1	1
GO:0061082	GO:0061082	myeloid leukocyte cytokine production	1/48	28/18723	0.0694016	0.120131	0.064475	HMOX1	1
GO:0071280	GO:0071280	cellular response to copper ion	1/48	28/18723	0.0694016	0.120131	0.064475	SNCA	1
GO:1902624	GO:1902624	positive regulation of neutrophil migration	1/48	28/18723	0.0694016	0.120131	0.064475	CXCL8	1
GO:1903020	GO:1903020	positive regulation of glycoprotein metabolic process	1/48	28/18723	0.0694016	0.120131	0.064475	IGF1	1
GO:1903649	GO:1903649	regulation of cytoplasmic transport	1/48	28/18723	0.0694016	0.120131	0.064475	LRRK2	1
GO:1903779	GO:1903779	regulation of cardiac conduction	1/48	28/18723	0.0694016	0.120131	0.064475	RYR2	1
GO:0000075	GO:0000075	cell cycle checkpoint signaling	2/48	169/18723	0.0697525	0.120482	0.0646629	CDK1/MUC1	2
GO:0018394	GO:0018394	peptidyl-lysine acetylation	2/48	169/18723	0.0697525	0.120482	0.0646629	SNCA/MUC1	2
GO:0031214	GO:0031214	biomineral tissue development	2/48	169/18723	0.0697525	0.120482	0.0646629	COMP/IGF1	2
GO:0046890	GO:0046890	regulation of lipid biosynthetic process	2/48	171/18723	0.0711912	0.122095	0.0655287	APOA1/APOE	2
GO:0110148	GO:0110148	biomineralization	2/48	171/18723	0.0711912	0.122095	0.0655287	COMP/IGF1	2
GO:0018108	GO:0018108	peptidyl-tyrosine phosphorylation	3/48	375/18723	0.0712288	0.122095	0.0655287	MAP2K6/IGF1/IL6	3
GO:0001916	GO:0001916	positive regulation of T cell mediated cytotoxicity	1/48	29/18723	0.071791	0.122095	0.0655287	HLA-DRA	1
GO:0002360	GO:0002360	T cell lineage commitment	1/48	29/18723	0.071791	0.122095	0.0655287	IL6	1
GO:0005979	GO:0005979	regulation of glycogen biosynthetic process	1/48	29/18723	0.071791	0.122095	0.0655287	IGF1	1
GO:0006656	GO:0006656	phosphatidylcholine biosynthetic process	1/48	29/18723	0.071791	0.122095	0.0655287	APOA1	1
GO:0010955	GO:0010955	negative regulation of protein processing	1/48	29/18723	0.071791	0.122095	0.0655287	LRRK2	1
GO:0010962	GO:0010962	regulation of glucan biosynthetic process	1/48	29/18723	0.071791	0.122095	0.0655287	IGF1	1
GO:0019359	GO:0019359	nicotinamide nucleotide biosynthetic process	1/48	29/18723	0.071791	0.122095	0.0655287	PTGIS	1
GO:0019363	GO:0019363	pyridine nucleotide biosynthetic process	1/48	29/18723	0.071791	0.122095	0.0655287	PTGIS	1
GO:0019433	GO:0019433	triglyceride catabolic process	1/48	29/18723	0.071791	0.122095	0.0655287	APOA1	1
GO:0021772	GO:0021772	olfactory bulb development	1/48	29/18723	0.071791	0.122095	0.0655287	LRRK2	1
GO:0022011	GO:0022011	myelination in peripheral nervous system	1/48	29/18723	0.071791	0.122095	0.0655287	NDRG1	1
GO:0032292	GO:0032292	peripheral nervous system axon ensheathment	1/48	29/18723	0.071791	0.122095	0.0655287	NDRG1	1
GO:0033028	GO:0033028	myeloid cell apoptotic process	1/48	29/18723	0.071791	0.122095	0.0655287	IL6	1
GO:0035066	GO:0035066	positive regulation of histone acetylation	1/48	29/18723	0.071791	0.122095	0.0655287	MUC1	1
GO:0072539	GO:0072539	T-helper 17 cell differentiation	1/48	29/18723	0.071791	0.122095	0.0655287	IL6	1
GO:0098868	GO:0098868	bone growth	1/48	29/18723	0.071791	0.122095	0.0655287	COMP	1
GO:1902230	GO:1902230	negative regulation of intrinsic apoptotic signaling pathway in response to DNA damage	1/48	29/18723	0.071791	0.122095	0.0655287	MUC1	1
GO:1902253	GO:1902253	regulation of intrinsic apoptotic signaling pathway by p53 class mediator	1/48	29/18723	0.071791	0.122095	0.0655287	MUC1	1
GO:1903318	GO:1903318	negative regulation of protein maturation	1/48	29/18723	0.071791	0.122095	0.0655287	LRRK2	1
GO:0001678	GO:0001678	cellular glucose homeostasis	2/48	172/18723	0.0719142	0.122134	0.0655496	XBP1/HMGCR	2
GO:1990138	GO:1990138	neuron projection extension	2/48	172/18723	0.0719142	0.122134	0.0655496	FN1/APOE	2
GO:0018212	GO:0018212	peptidyl-tyrosine modification	3/48	378/18723	0.0725761	0.123172	0.0661067	MAP2K6/IGF1/IL6	3
GO:0045619	GO:0045619	regulation of lymphocyte differentiation	2/48	174/18723	0.0733675	0.123726	0.066404	XBP1/HLA-DRA	2
GO:0022900	GO:0022900	electron transport chain	2/48	175/18723	0.0740978	0.123726	0.066404	SNCA/CDK1	2
GO:0052126	GO:0052126	movement in host environment	2/48	175/18723	0.0740978	0.123726	0.066404	CDK1/CXCL8	2
GO:0006884	GO:0006884	cell volume homeostasis	1/48	30/18723	0.0741743	0.123726	0.066404	AQP11	1
GO:0008209	GO:0008209	androgen metabolic process	1/48	30/18723	0.0741743	0.123726	0.066404	ESR1	1
GO:0019886	GO:0019886	antigen processing and presentation of exogenous peptide antigen via MHC class II	1/48	30/18723	0.0741743	0.123726	0.066404	HLA-DRA	1
GO:0031571	GO:0031571	mitotic G1 DNA damage checkpoint signaling	1/48	30/18723	0.0741743	0.123726	0.066404	MUC1	1
GO:0033137	GO:0033137	negative regulation of peptidyl-serine phosphorylation	1/48	30/18723	0.0741743	0.123726	0.066404	DMD	1
GO:0034390	GO:0034390	smooth muscle cell apoptotic process	1/48	30/18723	0.0741743	0.123726	0.066404	IGF1	1
GO:0034391	GO:0034391	regulation of smooth muscle cell apoptotic process	1/48	30/18723	0.0741743	0.123726	0.066404	IGF1	1
GO:0043032	GO:0043032	positive regulation of macrophage activation	1/48	30/18723	0.0741743	0.123726	0.066404	LRRK2	1
GO:0043304	GO:0043304	regulation of mast cell degranulation	1/48	30/18723	0.0741743	0.123726	0.066404	HMOX1	1
GO:0044788	GO:0044788	modulation by host of viral process	1/48	30/18723	0.0741743	0.123726	0.066404	APOE	1
GO:0045577	GO:0045577	regulation of B cell differentiation	1/48	30/18723	0.0741743	0.123726	0.066404	XBP1	1
GO:0045939	GO:0045939	negative regulation of steroid metabolic process	1/48	30/18723	0.0741743	0.123726	0.066404	APOE	1
GO:0046825	GO:0046825	regulation of protein export from nucleus	1/48	30/18723	0.0741743	0.123726	0.066404	TXN	1
GO:0048147	GO:0048147	negative regulation of fibroblast proliferation	1/48	30/18723	0.0741743	0.123726	0.066404	NUPR1	1
GO:0048799	GO:0048799	animal organ maturation	1/48	30/18723	0.0741743	0.123726	0.066404	IGF1	1
GO:0051968	GO:0051968	positive regulation of synaptic transmission, glutamatergic	1/48	30/18723	0.0741743	0.123726	0.066404	CCL2	1
GO:0060351	GO:0060351	cartilage development involved in endochondral bone morphogenesis	1/48	30/18723	0.0741743	0.123726	0.066404	COMP	1
GO:0060603	GO:0060603	mammary gland duct morphogenesis	1/48	30/18723	0.0741743	0.123726	0.066404	ESR1	1
GO:0070498	GO:0070498	interleukin-1-mediated signaling pathway	1/48	30/18723	0.0741743	0.123726	0.066404	IL6	1
GO:0140058	GO:0140058	neuron projection arborization	1/48	30/18723	0.0741743	0.123726	0.066404	LRRK2	1
GO:1902751	GO:1902751	positive regulation of cell cycle G2/M phase transition	1/48	30/18723	0.0741743	0.123726	0.066404	CDK1	1
GO:2000637	GO:2000637	positive regulation of gene silencing by miRNA	1/48	30/18723	0.0741743	0.123726	0.066404	IL6	1
GO:0032535	GO:0032535	regulation of cellular component size	3/48	383/18723	0.0748474	0.124677	0.0669147	AQP11/FN1/APOE	3
GO:1902903	GO:1902903	regulation of supramolecular fiber organization	3/48	383/18723	0.0748474	0.124677	0.0669147	SNCA/APOA1/APOE	3
GO:0051648	GO:0051648	vesicle localization	2/48	177/18723	0.0755654	0.125454	0.0673316	SNCA/LRRK2	2
GO:0009266	GO:0009266	response to temperature stimulus	2/48	178/18723	0.0763027	0.125454	0.0673316	HMOX1/IGF1	2
GO:0048015	GO:0048015	phosphatidylinositol-mediated signaling	2/48	178/18723	0.0763027	0.125454	0.0673316	FN1/IGF1	2
GO:0001516	GO:0001516	prostaglandin biosynthetic process	1/48	31/18723	0.0765516	0.125454	0.0673316	PTGIS	1
GO:0002063	GO:0002063	chondrocyte development	1/48	31/18723	0.0765516	0.125454	0.0673316	COMP	1
GO:0021988	GO:0021988	olfactory lobe development	1/48	31/18723	0.0765516	0.125454	0.0673316	LRRK2	1
GO:0030149	GO:0030149	sphingolipid catabolic process	1/48	31/18723	0.0765516	0.125454	0.0673316	GLA	1
GO:0031063	GO:0031063	regulation of histone deacetylation	1/48	31/18723	0.0765516	0.125454	0.0673316	LRRK2	1
GO:0033006	GO:0033006	regulation of mast cell activation involved in immune response	1/48	31/18723	0.0765516	0.125454	0.0673316	HMOX1	1
GO:0033238	GO:0033238	regulation of cellular amine metabolic process	1/48	31/18723	0.0765516	0.125454	0.0673316	SNCA	1
GO:0044819	GO:0044819	mitotic G1/S transition checkpoint signaling	1/48	31/18723	0.0765516	0.125454	0.0673316	MUC1	1
GO:0045066	GO:0045066	regulatory T cell differentiation	1/48	31/18723	0.0765516	0.125454	0.0673316	HLA-DRA	1
GO:0046457	GO:0046457	prostanoid biosynthetic process	1/48	31/18723	0.0765516	0.125454	0.0673316	PTGIS	1
GO:0048566	GO:0048566	embryonic digestive tract development	1/48	31/18723	0.0765516	0.125454	0.0673316	CXCL8	1
GO:0048710	GO:0048710	regulation of astrocyte differentiation	1/48	31/18723	0.0765516	0.125454	0.0673316	IL6	1
GO:0060045	GO:0060045	positive regulation of cardiac muscle cell proliferation	1/48	31/18723	0.0765516	0.125454	0.0673316	CDK1	1
GO:0060055	GO:0060055	angiogenesis involved in wound healing	1/48	31/18723	0.0765516	0.125454	0.0673316	XBP1	1
GO:0060148	GO:0060148	positive regulation of posttranscriptional gene silencing	1/48	31/18723	0.0765516	0.125454	0.0673316	IL6	1
GO:0070633	GO:0070633	transepithelial transport	1/48	31/18723	0.0765516	0.125454	0.0673316	ITPR1	1
GO:0070723	GO:0070723	response to cholesterol	1/48	31/18723	0.0765516	0.125454	0.0673316	HMGCR	1
GO:0071168	GO:0071168	protein localization to chromatin	1/48	31/18723	0.0765516	0.125454	0.0673316	ESR1	1
GO:1901797	GO:1901797	negative regulation of signal transduction by p53 class mediator	1/48	31/18723	0.0765516	0.125454	0.0673316	MUC1	1
GO:1902042	GO:1902042	negative regulation of extrinsic apoptotic signaling pathway via death domain receptors	1/48	31/18723	0.0765516	0.125454	0.0673316	HMOX1	1
GO:2000144	GO:2000144	positive regulation of DNA-templated transcription, initiation	1/48	31/18723	0.0765516	0.125454	0.0673316	ESR1	1
GO:0007033	GO:0007033	vacuole organization	2/48	180/18723	0.0777843	0.127217	0.0682777	LRRK2/NUPR1	2
GO:0010721	GO:0010721	negative regulation of cell development	2/48	180/18723	0.0777843	0.127217	0.0682777	IGF1/IL6	2
GO:0043409	GO:0043409	negative regulation of MAPK cascade	2/48	180/18723	0.0777843	0.127217	0.0682777	HMGCR/APOE	2
GO:0051656	GO:0051656	establishment of organelle localization	3/48	390/18723	0.0780804	0.127451	0.0684032	SNCA/HMOX1/LRRK2	3
GO:1901987	GO:1901987	regulation of cell cycle phase transition	3/48	390/18723	0.0780804	0.127451	0.0684032	CCL2/CDK1/MUC1	3
GO:0099504	GO:0099504	synaptic vesicle cycle	2/48	181/18723	0.0785285	0.127451	0.0684032	SNCA/LRRK2	2
GO:0040013	GO:0040013	negative regulation of locomotion	3/48	391/18723	0.0785473	0.127451	0.0684032	HMOX1/CCL2/APOE	3
GO:0006308	GO:0006308	DNA catabolic process	1/48	32/18723	0.078923	0.127451	0.0684032	IL6	1
GO:0010644	GO:0010644	cell communication by electrical coupling	1/48	32/18723	0.078923	0.127451	0.0684032	RYR2	1
GO:0010667	GO:0010667	negative regulation of cardiac muscle cell apoptotic process	1/48	32/18723	0.078923	0.127451	0.0684032	NUPR1	1
GO:0014044	GO:0014044	Schwann cell development	1/48	32/18723	0.078923	0.127451	0.0684032	NDRG1	1
GO:0019934	GO:0019934	cGMP-mediated signaling	1/48	32/18723	0.078923	0.127451	0.0684032	APOE	1
GO:0042744	GO:0042744	hydrogen peroxide catabolic process	1/48	32/18723	0.078923	0.127451	0.0684032	SNCA	1
GO:0043372	GO:0043372	positive regulation of CD4-positive, alpha-beta T cell differentiation	1/48	32/18723	0.078923	0.127451	0.0684032	HLA-DRA	1
GO:0050850	GO:0050850	positive regulation of calcium-mediated signaling	1/48	32/18723	0.078923	0.127451	0.0684032	IGF1	1
GO:0071875	GO:0071875	adrenergic receptor signaling pathway	1/48	32/18723	0.078923	0.127451	0.0684032	PLN	1
GO:0072525	GO:0072525	pyridine-containing compound biosynthetic process	1/48	32/18723	0.078923	0.127451	0.0684032	PTGIS	1
GO:0090022	GO:0090022	regulation of neutrophil chemotaxis	1/48	32/18723	0.078923	0.127451	0.0684032	CXCL8	1
GO:0090140	GO:0090140	regulation of mitochondrial fission	1/48	32/18723	0.078923	0.127451	0.0684032	LRRK2	1
GO:0097345	GO:0097345	mitochondrial outer membrane permeabilization	1/48	32/18723	0.078923	0.127451	0.0684032	BOK	1
GO:1900745	GO:1900745	positive regulation of p38MAPK cascade	1/48	32/18723	0.078923	0.127451	0.0684032	MAP3K5	1
GO:2000191	GO:2000191	regulation of fatty acid transport	1/48	32/18723	0.078923	0.127451	0.0684032	MAP2K6	1
GO:0048017	GO:0048017	inositol lipid-mediated signaling	2/48	182/18723	0.0792751	0.127934	0.0686628	FN1/IGF1	2
GO:0001881	GO:0001881	receptor recycling	1/48	33/18723	0.0812884	0.130061	0.0698044	SNCA	1
GO:0010737	GO:0010737	protein kinase A signaling	1/48	33/18723	0.0812884	0.130061	0.0698044	LRRK2	1
GO:0019362	GO:0019362	pyridine nucleotide metabolic process	1/48	33/18723	0.0812884	0.130061	0.0698044	PTGIS	1
GO:0034110	GO:0034110	regulation of homotypic cell-cell adhesion	1/48	33/18723	0.0812884	0.130061	0.0698044	IL6	1
GO:0035025	GO:0035025	positive regulation of Rho protein signal transduction	1/48	33/18723	0.0812884	0.130061	0.0698044	APOA1	1
GO:0046496	GO:0046496	nicotinamide nucleotide metabolic process	1/48	33/18723	0.0812884	0.130061	0.0698044	PTGIS	1
GO:0046685	GO:0046685	response to arsenic-containing substance	1/48	33/18723	0.0812884	0.130061	0.0698044	HMOX1	1
GO:0050901	GO:0050901	leukocyte tethering or rolling	1/48	33/18723	0.0812884	0.130061	0.0698044	VCAM1	1
GO:0060260	GO:0060260	regulation of transcription initiation from RNA polymerase II promoter	1/48	33/18723	0.0812884	0.130061	0.0698044	ESR1	1
GO:0071353	GO:0071353	cellular response to interleukin-4	1/48	33/18723	0.0812884	0.130061	0.0698044	XBP1	1
GO:0099174	GO:0099174	regulation of presynapse organization	1/48	33/18723	0.0812884	0.130061	0.0698044	SNCA	1
GO:1902692	GO:1902692	regulation of neuroblast proliferation	1/48	33/18723	0.0812884	0.130061	0.0698044	LRRK2	1
GO:1905606	GO:1905606	regulation of presynapse assembly	1/48	33/18723	0.0812884	0.130061	0.0698044	SNCA	1
GO:0006869	GO:0006869	lipid transport	3/48	398/18723	0.0818504	0.130875	0.0702408	APOA1/MAP2K6/APOE	3
GO:0031345	GO:0031345	negative regulation of cell projection organization	2/48	186/18723	0.0822836	0.131481	0.0705662	LRRK2/APOE	2
GO:0001662	GO:0001662	behavioral fear response	1/48	34/18723	0.0836479	0.132442	0.0710823	APOE	1
GO:0002446	GO:0002446	neutrophil mediated immunity	1/48	34/18723	0.0836479	0.132442	0.0710823	IL6	1
GO:0002495	GO:0002495	antigen processing and presentation of peptide antigen via MHC class II	1/48	34/18723	0.0836479	0.132442	0.0710823	HLA-DRA	1
GO:0007095	GO:0007095	mitotic G2 DNA damage checkpoint signaling	1/48	34/18723	0.0836479	0.132442	0.0710823	CDK1	1
GO:0007616	GO:0007616	long-term memory	1/48	34/18723	0.0836479	0.132442	0.0710823	APOE	1
GO:0032770	GO:0032770	positive regulation of monooxygenase activity	1/48	34/18723	0.0836479	0.132442	0.0710823	APOE	1
GO:0034383	GO:0034383	low-density lipoprotein particle clearance	1/48	34/18723	0.0836479	0.132442	0.0710823	HMOX1	1
GO:0055094	GO:0055094	response to lipoprotein particle	1/48	34/18723	0.0836479	0.132442	0.0710823	APOE	1
GO:0070050	GO:0070050	neuron cellular homeostasis	1/48	34/18723	0.0836479	0.132442	0.0710823	IL6	1
GO:0070884	GO:0070884	regulation of calcineurin-NFAT signaling cascade	1/48	34/18723	0.0836479	0.132442	0.0710823	IGF1	1
GO:0086019	GO:0086019	cell-cell signaling involved in cardiac conduction	1/48	34/18723	0.0836479	0.132442	0.0710823	RYR2	1
GO:0090075	GO:0090075	relaxation of muscle	1/48	34/18723	0.0836479	0.132442	0.0710823	PLN	1
GO:1990000	GO:1990000	amyloid fibril formation	1/48	34/18723	0.0836479	0.132442	0.0710823	APOE	1
GO:2000758	GO:2000758	positive regulation of peptidyl-lysine acetylation	1/48	34/18723	0.0836479	0.132442	0.0710823	MUC1	1
GO:0009566	GO:0009566	fertilization	2/48	190/18723	0.0853274	0.134852	0.0723755	UBXN8/CDK1	2
GO:0009755	GO:0009755	hormone-mediated signaling pathway	2/48	190/18723	0.0853274	0.134852	0.0723755	ESR1/NR3C2	2
GO:0002209	GO:0002209	behavioral defense response	1/48	35/18723	0.0860014	0.134852	0.0723755	APOE	1
GO:0003298	GO:0003298	physiological muscle hypertrophy	1/48	35/18723	0.0860014	0.134852	0.0723755	IGF1	1
GO:0003301	GO:0003301	physiological cardiac muscle hypertrophy	1/48	35/18723	0.0860014	0.134852	0.0723755	IGF1	1
GO:0010765	GO:0010765	positive regulation of sodium ion transport	1/48	35/18723	0.0860014	0.134852	0.0723755	DMD	1
GO:0019068	GO:0019068	virion assembly	1/48	35/18723	0.0860014	0.134852	0.0723755	APOE	1
GO:0039694	GO:0039694	viral RNA genome replication	1/48	35/18723	0.0860014	0.134852	0.0723755	CXCL8	1
GO:0045454	GO:0045454	cell redox homeostasis	1/48	35/18723	0.0860014	0.134852	0.0723755	TXN	1
GO:0045907	GO:0045907	positive regulation of vasoconstriction	1/48	35/18723	0.0860014	0.134852	0.0723755	HMGCR	1
GO:0061049	GO:0061049	cell growth involved in cardiac muscle cell development	1/48	35/18723	0.0860014	0.134852	0.0723755	IGF1	1
GO:0090050	GO:0090050	positive regulation of cell migration involved in sprouting angiogenesis	1/48	35/18723	0.0860014	0.134852	0.0723755	HMOX1	1
GO:0090181	GO:0090181	regulation of cholesterol metabolic process	1/48	35/18723	0.0860014	0.134852	0.0723755	APOE	1
GO:0098810	GO:0098810	neurotransmitter reuptake	1/48	35/18723	0.0860014	0.134852	0.0723755	SNCA	1
GO:0106056	GO:0106056	regulation of calcineurin-mediated signaling	1/48	35/18723	0.0860014	0.134852	0.0723755	IGF1	1
GO:0050821	GO:0050821	protein stabilization	2/48	191/18723	0.0860937	0.13491	0.0724065	APOA1/IGF1	2
GO:0032872	GO:0032872	regulation of stress-activated MAPK cascade	2/48	192/18723	0.0868621	0.136026	0.0730058	MAP3K5/HMGCR	2
GO:0050731	GO:0050731	positive regulation of peptidyl-tyrosine phosphorylation	2/48	193/18723	0.0876327	0.137031	0.0735451	IGF1/IL6	2
GO:0002504	GO:0002504	antigen processing and presentation of peptide or polysaccharide antigen via MHC class II	1/48	36/18723	0.088349	0.137031	0.0735451	HLA-DRA	1
GO:0014046	GO:0014046	dopamine secretion	1/48	36/18723	0.088349	0.137031	0.0735451	SNCA	1
GO:0014059	GO:0014059	regulation of dopamine secretion	1/48	36/18723	0.088349	0.137031	0.0735451	SNCA	1
GO:0036314	GO:0036314	response to sterol	1/48	36/18723	0.088349	0.137031	0.0735451	HMGCR	1
GO:0042119	GO:0042119	neutrophil activation	1/48	36/18723	0.088349	0.137031	0.0735451	CXCL8	1
GO:0046466	GO:0046466	membrane lipid catabolic process	1/48	36/18723	0.088349	0.137031	0.0735451	GLA	1
GO:0051955	GO:0051955	regulation of amino acid transport	1/48	36/18723	0.088349	0.137031	0.0735451	SNCA	1
GO:0060251	GO:0060251	regulation of glial cell proliferation	1/48	36/18723	0.088349	0.137031	0.0735451	IL6	1
GO:0070670	GO:0070670	response to interleukin-4	1/48	36/18723	0.088349	0.137031	0.0735451	XBP1	1
GO:0070873	GO:0070873	regulation of glycogen metabolic process	1/48	36/18723	0.088349	0.137031	0.0735451	IGF1	1
GO:0070897	GO:0070897	transcription preinitiation complex assembly	1/48	36/18723	0.088349	0.137031	0.0735451	ESR1	1
GO:0071402	GO:0071402	cellular response to lipoprotein particle stimulus	1/48	36/18723	0.088349	0.137031	0.0735451	APOE	1
GO:1901658	GO:1901658	glycosyl compound catabolic process	1/48	36/18723	0.088349	0.137031	0.0735451	GLA	1
GO:1902229	GO:1902229	regulation of intrinsic apoptotic signaling pathway in response to DNA damage	1/48	36/18723	0.088349	0.137031	0.0735451	MUC1	1
GO:0043161	GO:0043161	proteasome-mediated ubiquitin-dependent protein catabolic process	3/48	412/18723	0.088636	0.137389	0.073737	UBXN8/LRRK2/DNAJC10	3
GO:0030073	GO:0030073	insulin secretion	2/48	195/18723	0.08918	0.138056	0.0740951	HMGCR/IL6	2
GO:0070302	GO:0070302	regulation of stress-activated protein kinase signaling cascade	2/48	195/18723	0.08918	0.138056	0.0740951	MAP3K5/HMGCR	2
GO:0001558	GO:0001558	regulation of cell growth	3/48	414/18723	0.0896245	0.138656	0.0744171	FN1/APOE/IGF1	3
GO:0001763	GO:0001763	morphogenesis of a branching structure	2/48	196/18723	0.0899568	0.138817	0.0745034	ESR1/LRRK2	2
GO:0043393	GO:0043393	regulation of protein binding	2/48	196/18723	0.0899568	0.138817	0.0745034	LRRK2/APOE	2
GO:0071674	GO:0071674	mononuclear cell migration	2/48	196/18723	0.0899568	0.138817	0.0745034	CCL2/IL6	2
GO:0090276	GO:0090276	regulation of peptide hormone secretion	2/48	196/18723	0.0899568	0.138817	0.0745034	HMGCR/IL6	2
GO:0014904	GO:0014904	myotube cell development	1/48	37/18723	0.0906907	0.139242	0.0747318	IGF1	1
GO:0016202	GO:0016202	regulation of striated muscle tissue development	1/48	37/18723	0.0906907	0.139242	0.0747318	HMGCR	1
GO:0032885	GO:0032885	regulation of polysaccharide biosynthetic process	1/48	37/18723	0.0906907	0.139242	0.0747318	IGF1	1
GO:0034260	GO:0034260	negative regulation of GTPase activity	1/48	37/18723	0.0906907	0.139242	0.0747318	LRRK2	1
GO:0042401	GO:0042401	cellular biogenic amine biosynthetic process	1/48	37/18723	0.0906907	0.139242	0.0747318	SNCA	1
GO:0043368	GO:0043368	positive T cell selection	1/48	37/18723	0.0906907	0.139242	0.0747318	IL6	1
GO:0043403	GO:0043403	skeletal muscle tissue regeneration	1/48	37/18723	0.0906907	0.139242	0.0747318	IGF1	1
GO:0048009	GO:0048009	insulin-like growth factor receptor signaling pathway	1/48	37/18723	0.0906907	0.139242	0.0747318	IGF1	1
GO:0048167	GO:0048167	regulation of synaptic plasticity	2/48	198/18723	0.0915165	0.140333	0.0753172	SNCA/APOE	2
GO:0050864	GO:0050864	regulation of B cell activation	2/48	198/18723	0.0915165	0.140333	0.0753172	XBP1/IL6	2
GO:0002478	GO:0002478	antigen processing and presentation of exogenous peptide antigen	1/48	38/18723	0.0930265	0.141576	0.0759846	HLA-DRA	1
GO:0009309	GO:0009309	amine biosynthetic process	1/48	38/18723	0.0930265	0.141576	0.0759846	SNCA	1
GO:0010613	GO:0010613	positive regulation of cardiac muscle hypertrophy	1/48	38/18723	0.0930265	0.141576	0.0759846	IGF1	1
GO:0035886	GO:0035886	vascular associated smooth muscle cell differentiation	1/48	38/18723	0.0930265	0.141576	0.0759846	COMP	1
GO:0042596	GO:0042596	fear response	1/48	38/18723	0.0930265	0.141576	0.0759846	APOE	1
GO:0046676	GO:0046676	negative regulation of insulin secretion	1/48	38/18723	0.0930265	0.141576	0.0759846	HMGCR	1
GO:0048246	GO:0048246	macrophage chemotaxis	1/48	38/18723	0.0930265	0.141576	0.0759846	CCL2	1
GO:0071392	GO:0071392	cellular response to estradiol stimulus	1/48	38/18723	0.0930265	0.141576	0.0759846	ESR1	1
GO:0072524	GO:0072524	pyridine-containing compound metabolic process	1/48	38/18723	0.0930265	0.141576	0.0759846	PTGIS	1
GO:0072538	GO:0072538	T-helper 17 type immune response	1/48	38/18723	0.0930265	0.141576	0.0759846	IL6	1
GO:1902110	GO:1902110	positive regulation of mitochondrial membrane permeability involved in apoptotic process	1/48	38/18723	0.0930265	0.141576	0.0759846	BOK	1
GO:0002791	GO:0002791	regulation of peptide secretion	2/48	200/18723	0.0930842	0.141576	0.0759846	HMGCR/IL6	2
GO:0099003	GO:0099003	vesicle-mediated transport in synapse	2/48	200/18723	0.0930842	0.141576	0.0759846	SNCA/LRRK2	2
GO:0072594	GO:0072594	establishment of protein localization to organelle	3/48	422/18723	0.0936257	0.142311	0.0763788	RYR2/LRRK2/CDK1	3
GO:0048608	GO:0048608	reproductive structure development	3/48	424/18723	0.0946376	0.143152	0.0768304	ESR1/BOK/NUPR1	3
GO:0016051	GO:0016051	carbohydrate biosynthetic process	2/48	202/18723	0.0946598	0.143152	0.0768304	SNCA/IGF1	2
GO:0032388	GO:0032388	positive regulation of intracellular transport	2/48	202/18723	0.0946598	0.143152	0.0768304	STX18/CDK1	2
GO:0090087	GO:0090087	regulation of peptide transport	2/48	202/18723	0.0946598	0.143152	0.0768304	HMGCR/IL6	2
GO:0001914	GO:0001914	regulation of T cell mediated cytotoxicity	1/48	39/18723	0.0953564	0.143152	0.0768304	HLA-DRA	1
GO:0001941	GO:0001941	postsynaptic membrane organization	1/48	39/18723	0.0953564	0.143152	0.0768304	APOE	1
GO:0014742	GO:0014742	positive regulation of muscle hypertrophy	1/48	39/18723	0.0953564	0.143152	0.0768304	IGF1	1
GO:0016572	GO:0016572	histone phosphorylation	1/48	39/18723	0.0953564	0.143152	0.0768304	CDK1	1
GO:0042417	GO:0042417	dopamine metabolic process	1/48	39/18723	0.0953564	0.143152	0.0768304	SNCA	1
GO:0045622	GO:0045622	regulation of T-helper cell differentiation	1/48	39/18723	0.0953564	0.143152	0.0768304	HLA-DRA	1
GO:0045823	GO:0045823	positive regulation of heart contraction	1/48	39/18723	0.0953564	0.143152	0.0768304	RYR2	1
GO:0045923	GO:0045923	positive regulation of fatty acid metabolic process	1/48	39/18723	0.0953564	0.143152	0.0768304	APOA1	1
GO:0046326	GO:0046326	positive regulation of glucose import	1/48	39/18723	0.0953564	0.143152	0.0768304	IGF1	1
GO:0046461	GO:0046461	neutral lipid catabolic process	1/48	39/18723	0.0953564	0.143152	0.0768304	APOA1	1
GO:0046464	GO:0046464	acylglycerol catabolic process	1/48	39/18723	0.0953564	0.143152	0.0768304	APOA1	1
GO:0051154	GO:0051154	negative regulation of striated muscle cell differentiation	1/48	39/18723	0.0953564	0.143152	0.0768304	XBP1	1
GO:0086091	GO:0086091	regulation of heart rate by cardiac conduction	1/48	39/18723	0.0953564	0.143152	0.0768304	DSP	1
GO:1901021	GO:1901021	positive regulation of calcium ion transmembrane transporter activity	1/48	39/18723	0.0953564	0.143152	0.0768304	RYR2	1
GO:1901861	GO:1901861	regulation of muscle tissue development	1/48	39/18723	0.0953564	0.143152	0.0768304	HMGCR	1
GO:2000516	GO:2000516	positive regulation of CD4-positive, alpha-beta T cell activation	1/48	39/18723	0.0953564	0.143152	0.0768304	HLA-DRA	1
GO:0051701	GO:0051701	biological process involved in interaction with host	2/48	203/18723	0.0954506	0.143205	0.0768588	CDK1/CXCL8	2
GO:0061458	GO:0061458	reproductive system development	3/48	427/18723	0.096164	0.144187	0.0773856	ESR1/BOK/NUPR1	3
GO:0071383	GO:0071383	cellular response to steroid hormone stimulus	2/48	204/18723	0.0962433	0.144217	0.0774016	ESR1/NR3C2	2
GO:0043254	GO:0043254	regulation of protein-containing complex assembly	3/48	428/18723	0.0966751	0.144775	0.077701	ESR1/SNCA/APOE	3
GO:0010863	GO:0010863	positive regulation of phospholipase C activity	1/48	40/18723	0.0976805	0.145207	0.0779332	ESR1	1
GO:0031111	GO:0031111	negative regulation of microtubule polymerization or depolymerization	1/48	40/18723	0.0976805	0.145207	0.0779332	SNCA	1
GO:0032892	GO:0032892	positive regulation of organic acid transport	1/48	40/18723	0.0976805	0.145207	0.0779332	MAP2K6	1
GO:0045740	GO:0045740	positive regulation of DNA replication	1/48	40/18723	0.0976805	0.145207	0.0779332	CDK1	1
GO:0051281	GO:0051281	positive regulation of release of sequestered calcium ion into cytosol	1/48	40/18723	0.0976805	0.145207	0.0779332	SNCA	1
GO:0070266	GO:0070266	necroptotic process	1/48	40/18723	0.0976805	0.145207	0.0779332	BOK	1
GO:0071276	GO:0071276	cellular response to cadmium ion	1/48	40/18723	0.0976805	0.145207	0.0779332	HMOX1	1
GO:1901020	GO:1901020	negative regulation of calcium ion transmembrane transporter activity	1/48	40/18723	0.0976805	0.145207	0.0779332	PLN	1
GO:1901661	GO:1901661	quinone metabolic process	1/48	40/18723	0.0976805	0.145207	0.0779332	HMGCR	1
GO:1902686	GO:1902686	mitochondrial outer membrane permeabilization involved in programmed cell death	1/48	40/18723	0.0976805	0.145207	0.0779332	BOK	1
GO:1904994	GO:1904994	regulation of leukocyte adhesion to vascular endothelial cell	1/48	40/18723	0.0976805	0.145207	0.0779332	IL6	1
GO:2000142	GO:2000142	regulation of DNA-templated transcription, initiation	1/48	40/18723	0.0976805	0.145207	0.0779332	ESR1	1
GO:0048863	GO:0048863	stem cell differentiation	2/48	206/18723	0.0978345	0.145347	0.0780084	ESR1/FN1	2
GO:0016064	GO:0016064	immunoglobulin mediated immune response	2/48	207/18723	0.098633	0.146444	0.078597	C1R/HLA-DRA	2
GO:0006836	GO:0006836	neurotransmitter transport	2/48	208/18723	0.0994333	0.147125	0.0789623	SNCA/LRRK2	2
GO:0002683	GO:0002683	negative regulation of immune system process	3/48	434/18723	0.0997655	0.147125	0.0789623	APOA1/HMOX1/CCL2	3
GO:0002251	GO:0002251	organ or tissue specific immune response	1/48	41/18723	0.0999987	0.147125	0.0789623	IL6	1
GO:0010907	GO:0010907	positive regulation of glucose metabolic process	1/48	41/18723	0.0999987	0.147125	0.0789623	IGF1	1
GO:0032733	GO:0032733	positive regulation of interleukin-10 production	1/48	41/18723	0.0999987	0.147125	0.0789623	IL6	1
GO:0042307	GO:0042307	positive regulation of protein import into nucleus	1/48	41/18723	0.0999987	0.147125	0.0789623	CDK1	1
GO:0048634	GO:0048634	regulation of muscle organ development	1/48	41/18723	0.0999987	0.147125	0.0789623	HMGCR	1
GO:0050892	GO:0050892	intestinal absorption	1/48	41/18723	0.0999987	0.147125	0.0789623	APOA1	1
GO:0060612	GO:0060612	adipose tissue development	1/48	41/18723	0.0999987	0.147125	0.0789623	XBP1	1
GO:0071634	GO:0071634	regulation of transforming growth factor beta production	1/48	41/18723	0.0999987	0.147125	0.0789623	FN1	1
GO:1900026	GO:1900026	positive regulation of substrate adhesion-dependent cell spreading	1/48	41/18723	0.0999987	0.147125	0.0789623	APOA1	1
GO:1900371	GO:1900371	regulation of purine nucleotide biosynthetic process	1/48	41/18723	0.0999987	0.147125	0.0789623	SNCA	1
GO:1901385	GO:1901385	regulation of voltage-gated calcium channel activity	1/48	41/18723	0.0999987	0.147125	0.0789623	DMD	1
GO:1902622	GO:1902622	regulation of neutrophil migration	1/48	41/18723	0.0999987	0.147125	0.0789623	CXCL8	1
GO:1903524	GO:1903524	positive regulation of blood circulation	1/48	41/18723	0.0999987	0.147125	0.0789623	RYR2	1
GO:1902905	GO:1902905	positive regulation of supramolecular fiber organization	2/48	209/18723	0.100235	0.147384	0.0791014	APOA1/APOE	2
GO:0019724	GO:0019724	B cell mediated immunity	2/48	210/18723	0.10104	0.148387	0.0796396	C1R/HLA-DRA	2
GO:0050866	GO:0050866	negative regulation of cell activation	2/48	210/18723	0.10104	0.148387	0.0796396	HMOX1/APOE	2
GO:0000266	GO:0000266	mitochondrial fission	1/48	42/18723	0.102311	0.148905	0.0799179	LRRK2	1
GO:0007212	GO:0007212	dopamine receptor signaling pathway	1/48	42/18723	0.102311	0.148905	0.0799179	LRRK2	1
GO:0010677	GO:0010677	negative regulation of cellular carbohydrate metabolic process	1/48	42/18723	0.102311	0.148905	0.0799179	NUPR1	1
GO:0030808	GO:0030808	regulation of nucleotide biosynthetic process	1/48	42/18723	0.102311	0.148905	0.0799179	SNCA	1
GO:0032965	GO:0032965	regulation of collagen biosynthetic process	1/48	42/18723	0.102311	0.148905	0.0799179	IL6	1
GO:0033003	GO:0033003	regulation of mast cell activation	1/48	42/18723	0.102311	0.148905	0.0799179	HMOX1	1
GO:0033574	GO:0033574	response to testosterone	1/48	42/18723	0.102311	0.148905	0.0799179	PLN	1
GO:0042168	GO:0042168	heme metabolic process	1/48	42/18723	0.102311	0.148905	0.0799179	HMOX1	1
GO:0043507	GO:0043507	positive regulation of JUN kinase activity	1/48	42/18723	0.102311	0.148905	0.0799179	MAP3K5	1
GO:0045773	GO:0045773	positive regulation of axon extension	1/48	42/18723	0.102311	0.148905	0.0799179	FN1	1
GO:0051452	GO:0051452	intracellular pH reduction	1/48	42/18723	0.102311	0.148905	0.0799179	AQP11	1
GO:0060999	GO:0060999	positive regulation of dendritic spine development	1/48	42/18723	0.102311	0.148905	0.0799179	APOE	1
GO:0071312	GO:0071312	cellular response to alkaloid	1/48	42/18723	0.102311	0.148905	0.0799179	RYR2	1
GO:0072595	GO:0072595	maintenance of protein localization in organelle	1/48	42/18723	0.102311	0.148905	0.0799179	TXN	1
GO:1900274	GO:1900274	regulation of phospholipase C activity	1/48	42/18723	0.102311	0.148905	0.0799179	ESR1	1
GO:0009749	GO:0009749	response to glucose	2/48	212/18723	0.102653	0.149224	0.0800893	XBP1/HMGCR	2
GO:0030258	GO:0030258	lipid modification	2/48	212/18723	0.102653	0.149224	0.0800893	APOA1/APOE	2
GO:0001505	GO:0001505	regulation of neurotransmitter levels	2/48	213/18723	0.103463	0.150284	0.0806577	SNCA/LRRK2	2
GO:0044242	GO:0044242	cellular lipid catabolic process	2/48	214/18723	0.104274	0.150284	0.0806577	APOA1/GLA	2
GO:0022411	GO:0022411	cellular component disassembly	3/48	443/18723	0.104476	0.150284	0.0806577	BOK/CDK1/IL6	3
GO:0001504	GO:0001504	neurotransmitter uptake	1/48	43/18723	0.104618	0.150284	0.0806577	SNCA	1
GO:0006509	GO:0006509	membrane protein ectodomain proteolysis	1/48	43/18723	0.104618	0.150284	0.0806577	APOE	1
GO:0014002	GO:0014002	astrocyte development	1/48	43/18723	0.104618	0.150284	0.0806577	IL6	1
GO:0033173	GO:0033173	calcineurin-NFAT signaling cascade	1/48	43/18723	0.104618	0.150284	0.0806577	IGF1	1
GO:0035794	GO:0035794	positive regulation of mitochondrial membrane permeability	1/48	43/18723	0.104618	0.150284	0.0806577	BOK	1
GO:0036230	GO:0036230	granulocyte activation	1/48	43/18723	0.104618	0.150284	0.0806577	CXCL8	1
GO:0045840	GO:0045840	positive regulation of mitotic nuclear division	1/48	43/18723	0.104618	0.150284	0.0806577	IGF1	1
GO:0045981	GO:0045981	positive regulation of nucleotide metabolic process	1/48	43/18723	0.104618	0.150284	0.0806577	IGF1	1
GO:0060443	GO:0060443	mammary gland morphogenesis	1/48	43/18723	0.104618	0.150284	0.0806577	ESR1	1
GO:0071604	GO:0071604	transforming growth factor beta production	1/48	43/18723	0.104618	0.150284	0.0806577	FN1	1
GO:0090278	GO:0090278	negative regulation of peptide hormone secretion	1/48	43/18723	0.104618	0.150284	0.0806577	HMGCR	1
GO:0098815	GO:0098815	modulation of excitatory postsynaptic potential	1/48	43/18723	0.104618	0.150284	0.0806577	LRRK2	1
GO:0140353	GO:0140353	lipid export from cell	1/48	43/18723	0.104618	0.150284	0.0806577	MAP2K6	1
GO:1900544	GO:1900544	positive regulation of purine nucleotide metabolic process	1/48	43/18723	0.104618	0.150284	0.0806577	IGF1	1
GO:1903793	GO:1903793	positive regulation of anion transport	1/48	43/18723	0.104618	0.150284	0.0806577	MAP2K6	1
GO:1904591	GO:1904591	positive regulation of protein import	1/48	43/18723	0.104618	0.150284	0.0806577	CDK1	1
GO:1904706	GO:1904706	negative regulation of vascular associated smooth muscle cell proliferation	1/48	43/18723	0.104618	0.150284	0.0806577	HMOX1	1
GO:0010975	GO:0010975	regulation of neuron projection development	3/48	445/18723	0.105535	0.151512	0.0813171	LRRK2/FN1/APOE	3
GO:0009612	GO:0009612	response to mechanical stimulus	2/48	216/18723	0.105902	0.151949	0.0815516	RYR2/DMD	2
GO:0002792	GO:0002792	negative regulation of peptide secretion	1/48	44/18723	0.106918	0.152062	0.0816121	HMGCR	1
GO:0005978	GO:0005978	glycogen biosynthetic process	1/48	44/18723	0.106918	0.152062	0.0816121	IGF1	1
GO:0007528	GO:0007528	neuromuscular junction development	1/48	44/18723	0.106918	0.152062	0.0816121	LRRK2	1
GO:0008542	GO:0008542	visual learning	1/48	44/18723	0.106918	0.152062	0.0816121	HMGCR	1
GO:0009250	GO:0009250	glucan biosynthetic process	1/48	44/18723	0.106918	0.152062	0.0816121	IGF1	1
GO:0032620	GO:0032620	interleukin-17 production	1/48	44/18723	0.106918	0.152062	0.0816121	IL6	1
GO:0032660	GO:0032660	regulation of interleukin-17 production	1/48	44/18723	0.106918	0.152062	0.0816121	IL6	1
GO:0032881	GO:0032881	regulation of polysaccharide metabolic process	1/48	44/18723	0.106918	0.152062	0.0816121	IGF1	1
GO:0044058	GO:0044058	regulation of digestive system process	1/48	44/18723	0.106918	0.152062	0.0816121	APOA1	1
GO:0045124	GO:0045124	regulation of bone resorption	1/48	44/18723	0.106918	0.152062	0.0816121	IL6	1
GO:0046006	GO:0046006	regulation of activated T cell proliferation	1/48	44/18723	0.106918	0.152062	0.0816121	IGF1	1
GO:0046427	GO:0046427	positive regulation of receptor signaling pathway via JAK-STAT	1/48	44/18723	0.106918	0.152062	0.0816121	IL6	1
GO:0048806	GO:0048806	genitalia development	1/48	44/18723	0.106918	0.152062	0.0816121	ESR1	1
GO:0062208	GO:0062208	positive regulation of pattern recognition receptor signaling pathway	1/48	44/18723	0.106918	0.152062	0.0816121	RSAD2	1
GO:1903214	GO:1903214	regulation of protein targeting to mitochondrion	1/48	44/18723	0.106918	0.152062	0.0816121	LRRK2	1
GO:0009746	GO:0009746	response to hexose	2/48	219/18723	0.108357	0.154018	0.0826619	XBP1/HMGCR	2
GO:0003009	GO:0003009	skeletal muscle contraction	1/48	45/18723	0.109213	0.154064	0.0826869	DMD	1
GO:0008631	GO:0008631	intrinsic apoptotic signaling pathway in response to oxidative stress	1/48	45/18723	0.109213	0.154064	0.0826869	MAP3K5	1
GO:0030850	GO:0030850	prostate gland development	1/48	45/18723	0.109213	0.154064	0.0826869	ESR1	1
GO:0032309	GO:0032309	icosanoid secretion	1/48	45/18723	0.109213	0.154064	0.0826869	MAP2K6	1
GO:0035384	GO:0035384	thioester biosynthetic process	1/48	45/18723	0.109213	0.154064	0.0826869	SNCA	1
GO:0042551	GO:0042551	neuron maturation	1/48	45/18723	0.109213	0.154064	0.0826869	LRRK2	1
GO:0046189	GO:0046189	phenol-containing compound biosynthetic process	1/48	45/18723	0.109213	0.154064	0.0826869	SNCA	1
GO:0048599	GO:0048599	oocyte development	1/48	45/18723	0.109213	0.154064	0.0826869	IGF1	1
GO:0051180	GO:0051180	vitamin transport	1/48	45/18723	0.109213	0.154064	0.0826869	APOA1	1
GO:0071616	GO:0071616	acyl-CoA biosynthetic process	1/48	45/18723	0.109213	0.154064	0.0826869	SNCA	1
GO:1901985	GO:1901985	positive regulation of protein acetylation	1/48	45/18723	0.109213	0.154064	0.0826869	MUC1	1
GO:1902108	GO:1902108	regulation of mitochondrial membrane permeability involved in apoptotic process	1/48	45/18723	0.109213	0.154064	0.0826869	BOK	1
GO:2000273	GO:2000273	positive regulation of signaling receptor activity	1/48	45/18723	0.109213	0.154064	0.0826869	CCL2	1
GO:0010810	GO:0010810	regulation of cell-substrate adhesion	2/48	221/18723	0.110002	0.155087	0.083236	APOA1/FN1	2
GO:0009314	GO:0009314	response to radiation	3/48	456/18723	0.111436	0.155847	0.0836438	VCAM1/TXN/HMGCR	3
GO:0006984	GO:0006984	ER-nucleus signaling pathway	1/48	46/18723	0.111503	0.155847	0.0836438	BOK	1
GO:0007157	GO:0007157	heterophilic cell-cell adhesion via plasma membrane cell adhesion molecules	1/48	46/18723	0.111503	0.155847	0.0836438	VCAM1	1
GO:0010828	GO:0010828	positive regulation of glucose transmembrane transport	1/48	46/18723	0.111503	0.155847	0.0836438	IGF1	1
GO:0010830	GO:0010830	regulation of myotube differentiation	1/48	46/18723	0.111503	0.155847	0.0836438	XBP1	1
GO:0031018	GO:0031018	endocrine pancreas development	1/48	46/18723	0.111503	0.155847	0.0836438	IL6	1
GO:0031057	GO:0031057	negative regulation of histone modification	1/48	46/18723	0.111503	0.155847	0.0836438	SNCA	1
GO:0031648	GO:0031648	protein destabilization	1/48	46/18723	0.111503	0.155847	0.0836438	SNCA	1
GO:0034198	GO:0034198	cellular response to amino acid starvation	1/48	46/18723	0.111503	0.155847	0.0836438	MAP3K5	1
GO:0043300	GO:0043300	regulation of leukocyte degranulation	1/48	46/18723	0.111503	0.155847	0.0836438	HMOX1	1
GO:0044818	GO:0044818	mitotic G2/M transition checkpoint	1/48	46/18723	0.111503	0.155847	0.0836438	CDK1	1
GO:0045851	GO:0045851	pH reduction	1/48	46/18723	0.111503	0.155847	0.0836438	AQP11	1
GO:0050919	GO:0050919	negative chemotaxis	1/48	46/18723	0.111503	0.155847	0.0836438	APOA1	1
GO:0072599	GO:0072599	establishment of protein localization to endoplasmic reticulum	1/48	46/18723	0.111503	0.155847	0.0836438	RYR2	1
GO:1900271	GO:1900271	regulation of long-term synaptic potentiation	1/48	46/18723	0.111503	0.155847	0.0836438	APOE	1
GO:0034284	GO:0034284	response to monosaccharide	2/48	225/18723	0.113313	0.1575	0.0845309	XBP1/HMGCR	2
GO:0050769	GO:0050769	positive regulation of neurogenesis	2/48	225/18723	0.113313	0.1575	0.0845309	FN1/IL6	2
GO:0007595	GO:0007595	lactation	1/48	47/18723	0.113786	0.1575	0.0845309	XBP1	1
GO:0010712	GO:0010712	regulation of collagen metabolic process	1/48	47/18723	0.113786	0.1575	0.0845309	IL6	1
GO:0010803	GO:0010803	regulation of tumor necrosis factor-mediated signaling pathway	1/48	47/18723	0.113786	0.1575	0.0845309	APOA1	1
GO:0014911	GO:0014911	positive regulation of smooth muscle cell migration	1/48	47/18723	0.113786	0.1575	0.0845309	IGF1	1
GO:0019884	GO:0019884	antigen processing and presentation of exogenous antigen	1/48	47/18723	0.113786	0.1575	0.0845309	HLA-DRA	1
GO:0042311	GO:0042311	vasodilation	1/48	47/18723	0.113786	0.1575	0.0845309	APOE	1
GO:0043114	GO:0043114	regulation of vascular permeability	1/48	47/18723	0.113786	0.1575	0.0845309	APOE	1
GO:0050798	GO:0050798	activated T cell proliferation	1/48	47/18723	0.113786	0.1575	0.0845309	IGF1	1
GO:0061001	GO:0061001	regulation of dendritic spine morphogenesis	1/48	47/18723	0.113786	0.1575	0.0845309	LRRK2	1
GO:0101023	GO:0101023	vascular endothelial cell proliferation	1/48	47/18723	0.113786	0.1575	0.0845309	CCL2	1
GO:0120163	GO:0120163	negative regulation of cold-induced thermogenesis	1/48	47/18723	0.113786	0.1575	0.0845309	MAP2K6	1
GO:1900744	GO:1900744	regulation of p38MAPK cascade	1/48	47/18723	0.113786	0.1575	0.0845309	MAP3K5	1
GO:1903170	GO:1903170	negative regulation of calcium ion transmembrane transport	1/48	47/18723	0.113786	0.1575	0.0845309	PLN	1
GO:1903587	GO:1903587	regulation of blood vessel endothelial cell proliferation involved in sprouting angiogenesis	1/48	47/18723	0.113786	0.1575	0.0845309	HMOX1	1
GO:1905562	GO:1905562	regulation of vascular endothelial cell proliferation	1/48	47/18723	0.113786	0.1575	0.0845309	CCL2	1
GO:0002673	GO:0002673	regulation of acute inflammatory response	1/48	48/18723	0.116064	0.159653	0.0856865	IL6	1
GO:0030261	GO:0030261	chromosome condensation	1/48	48/18723	0.116064	0.159653	0.0856865	CDK1	1
GO:0033628	GO:0033628	regulation of cell adhesion mediated by integrin	1/48	48/18723	0.116064	0.159653	0.0856865	MUC1	1
GO:0042149	GO:0042149	cellular response to glucose starvation	1/48	48/18723	0.116064	0.159653	0.0856865	XBP1	1
GO:0043303	GO:0043303	mast cell degranulation	1/48	48/18723	0.116064	0.159653	0.0856865	HMOX1	1
GO:0045912	GO:0045912	negative regulation of carbohydrate metabolic process	1/48	48/18723	0.116064	0.159653	0.0856865	NUPR1	1
GO:0090199	GO:0090199	regulation of release of cytochrome c from mitochondria	1/48	48/18723	0.116064	0.159653	0.0856865	IGF1	1
GO:0090311	GO:0090311	regulation of protein deacetylation	1/48	48/18723	0.116064	0.159653	0.0856865	LRRK2	1
GO:0097720	GO:0097720	calcineurin-mediated signaling	1/48	48/18723	0.116064	0.159653	0.0856865	IGF1	1
GO:1903053	GO:1903053	regulation of extracellular matrix organization	1/48	48/18723	0.116064	0.159653	0.0856865	IL6	1
GO:1905710	GO:1905710	positive regulation of membrane permeability	1/48	48/18723	0.116064	0.159653	0.0856865	BOK	1
GO:0045444	GO:0045444	fat cell differentiation	2/48	229/18723	0.11665	0.160279	0.0860221	XBP1/IL6	2
GO:0071695	GO:0071695	anatomical structure maturation	2/48	229/18723	0.11665	0.160279	0.0860221	LRRK2/IGF1	2
GO:0061564	GO:0061564	axon development	3/48	467/18723	0.117463	0.161048	0.0864349	APOA1/FN1/APOE	3
GO:0002764	GO:0002764	immune response-regulating signaling pathway	3/48	468/18723	0.118017	0.161048	0.0864349	ESR1/RSAD2/MAP2K6	3
GO:0001913	GO:0001913	T cell mediated cytotoxicity	1/48	49/18723	0.118336	0.161048	0.0864349	HLA-DRA	1
GO:0002279	GO:0002279	mast cell activation involved in immune response	1/48	49/18723	0.118336	0.161048	0.0864349	HMOX1	1
GO:0006692	GO:0006692	prostanoid metabolic process	1/48	49/18723	0.118336	0.161048	0.0864349	PTGIS	1
GO:0006693	GO:0006693	prostaglandin metabolic process	1/48	49/18723	0.118336	0.161048	0.0864349	PTGIS	1
GO:0006778	GO:0006778	porphyrin-containing compound metabolic process	1/48	49/18723	0.118336	0.161048	0.0864349	HMOX1	1
GO:0009994	GO:0009994	oocyte differentiation	1/48	49/18723	0.118336	0.161048	0.0864349	IGF1	1
GO:0014075	GO:0014075	response to amine	1/48	49/18723	0.118336	0.161048	0.0864349	CDK1	1
GO:0030195	GO:0030195	negative regulation of blood coagulation	1/48	49/18723	0.118336	0.161048	0.0864349	APOE	1
GO:0034332	GO:0034332	adherens junction organization	1/48	49/18723	0.118336	0.161048	0.0864349	DSP	1
GO:0042304	GO:0042304	regulation of fatty acid biosynthetic process	1/48	49/18723	0.118336	0.161048	0.0864349	APOA1	1
GO:0052372	GO:0052372	modulation by symbiont of entry into host	1/48	49/18723	0.118336	0.161048	0.0864349	CXCL8	1
GO:1901799	GO:1901799	negative regulation of proteasomal protein catabolic process	1/48	49/18723	0.118336	0.161048	0.0864349	AQP11	1
GO:1902041	GO:1902041	regulation of extrinsic apoptotic signaling pathway via death domain receptors	1/48	49/18723	0.118336	0.161048	0.0864349	HMOX1	1
GO:1904894	GO:1904894	positive regulation of receptor signaling pathway via STAT	1/48	49/18723	0.118336	0.161048	0.0864349	IL6	1
GO:1990928	GO:1990928	response to amino acid starvation	1/48	49/18723	0.118336	0.161048	0.0864349	MAP3K5	1
GO:0010594	GO:0010594	regulation of endothelial cell migration	2/48	232/18723	0.119169	0.162092	0.0869953	HMOX1/APOE	2
GO:0007160	GO:0007160	cell-matrix adhesion	2/48	233/18723	0.120012	0.163128	0.0875513	VCAM1/FN1	2
GO:0002448	GO:0002448	mast cell mediated immunity	1/48	50/18723	0.120602	0.163128	0.0875513	HMOX1	1
GO:0007632	GO:0007632	visual behavior	1/48	50/18723	0.120602	0.163128	0.0875513	HMGCR	1
GO:0015872	GO:0015872	dopamine transport	1/48	50/18723	0.120602	0.163128	0.0875513	SNCA	1
GO:0045058	GO:0045058	T cell selection	1/48	50/18723	0.120602	0.163128	0.0875513	IL6	1
GO:0046638	GO:0046638	positive regulation of alpha-beta T cell differentiation	1/48	50/18723	0.120602	0.163128	0.0875513	HLA-DRA	1
GO:0051646	GO:0051646	mitochondrion localization	1/48	50/18723	0.120602	0.163128	0.0875513	LRRK2	1
GO:0099054	GO:0099054	presynapse assembly	1/48	50/18723	0.120602	0.163128	0.0875513	SNCA	1
GO:1903747	GO:1903747	regulation of establishment of protein localization to mitochondrion	1/48	50/18723	0.120602	0.163128	0.0875513	LRRK2	1
GO:2000677	GO:2000677	regulation of transcription regulatory region DNA binding	1/48	50/18723	0.120602	0.163128	0.0875513	IGF1	1
GO:0030072	GO:0030072	peptide hormone secretion	2/48	236/18723	0.12255	0.165084	0.088601	HMGCR/IL6	2
GO:0048762	GO:0048762	mesenchymal cell differentiation	2/48	236/18723	0.12255	0.165084	0.088601	FN1/IL6	2
GO:0090068	GO:0090068	positive regulation of cell cycle process	2/48	236/18723	0.12255	0.165084	0.088601	CDK1/IGF1	2
GO:0006120	GO:0006120	mitochondrial electron transport, NADH to ubiquinone	1/48	51/18723	0.122862	0.165084	0.088601	SNCA	1
GO:0006636	GO:0006636	unsaturated fatty acid biosynthetic process	1/48	51/18723	0.122862	0.165084	0.088601	PTGIS	1
GO:0014009	GO:0014009	glial cell proliferation	1/48	51/18723	0.122862	0.165084	0.088601	IL6	1
GO:0032964	GO:0032964	collagen biosynthetic process	1/48	51/18723	0.122862	0.165084	0.088601	IL6	1
GO:0043124	GO:0043124	negative regulation of I-kappaB kinase/NF-kappaB signaling	1/48	51/18723	0.122862	0.165084	0.088601	ESR1	1
GO:0043370	GO:0043370	regulation of CD4-positive, alpha-beta T cell differentiation	1/48	51/18723	0.122862	0.165084	0.088601	HLA-DRA	1
GO:0046850	GO:0046850	regulation of bone remodeling	1/48	51/18723	0.122862	0.165084	0.088601	IL6	1
GO:0060043	GO:0060043	regulation of cardiac muscle cell proliferation	1/48	51/18723	0.122862	0.165084	0.088601	CDK1	1
GO:0071622	GO:0071622	regulation of granulocyte chemotaxis	1/48	51/18723	0.122862	0.165084	0.088601	CXCL8	1
GO:0031334	GO:0031334	positive regulation of protein-containing complex assembly	2/48	237/18723	0.123399	0.165713	0.0889388	ESR1/SNCA	2
GO:0072593	GO:0072593	reactive oxygen species metabolic process	2/48	239/18723	0.125101	0.167282	0.0897807	SNCA/LRRK2	2
GO:0006890	GO:0006890	retrograde vesicle-mediated transport, Golgi to endoplasmic reticulum	1/48	52/18723	0.125117	0.167282	0.0897807	STX18	1
GO:0010718	GO:0010718	positive regulation of epithelial to mesenchymal transition	1/48	52/18723	0.125117	0.167282	0.0897807	IL6	1
GO:0031103	GO:0031103	axon regeneration	1/48	52/18723	0.125117	0.167282	0.0897807	APOA1	1
GO:0043277	GO:0043277	apoptotic cell clearance	1/48	52/18723	0.125117	0.167282	0.0897807	CCL2	1
GO:0043392	GO:0043392	negative regulation of DNA binding	1/48	52/18723	0.125117	0.167282	0.0897807	HMOX1	1
GO:0051496	GO:0051496	positive regulation of stress fiber assembly	1/48	52/18723	0.125117	0.167282	0.0897807	APOA1	1
GO:1903426	GO:1903426	regulation of reactive oxygen species biosynthetic process	1/48	52/18723	0.125117	0.167282	0.0897807	SNCA	1
GO:0016049	GO:0016049	cell growth	3/48	482/18723	0.125878	0.168206	0.0902767	FN1/APOE/IGF1	3
GO:0001541	GO:0001541	ovarian follicle development	1/48	53/18723	0.127367	0.169636	0.0910443	ESR1	1
GO:0008347	GO:0008347	glial cell migration	1/48	53/18723	0.127367	0.169636	0.0910443	CCL2	1
GO:0043113	GO:0043113	receptor clustering	1/48	53/18723	0.127367	0.169636	0.0910443	APOE	1
GO:0050819	GO:0050819	negative regulation of coagulation	1/48	53/18723	0.127367	0.169636	0.0910443	APOE	1
GO:0071715	GO:0071715	icosanoid transport	1/48	53/18723	0.127367	0.169636	0.0910443	MAP2K6	1
GO:0099172	GO:0099172	presynapse organization	1/48	53/18723	0.127367	0.169636	0.0910443	SNCA	1
GO:0002790	GO:0002790	peptide secretion	2/48	242/18723	0.127665	0.169941	0.0912079	HMGCR/IL6	2
GO:0016358	GO:0016358	dendrite development	2/48	243/18723	0.128523	0.170989	0.0917704	LRRK2/APOE	2
GO:0002043	GO:0002043	blood vessel endothelial cell proliferation involved in sprouting angiogenesis	1/48	54/18723	0.12961	0.171684	0.0921434	HMOX1	1
GO:0006584	GO:0006584	catecholamine metabolic process	1/48	54/18723	0.12961	0.171684	0.0921434	SNCA	1
GO:0009712	GO:0009712	catechol-containing compound metabolic process	1/48	54/18723	0.12961	0.171684	0.0921434	SNCA	1
GO:0010524	GO:0010524	positive regulation of calcium ion transport into cytosol	1/48	54/18723	0.12961	0.171684	0.0921434	SNCA	1
GO:0030520	GO:0030520	intracellular estrogen receptor signaling pathway	1/48	54/18723	0.12961	0.171684	0.0921434	ESR1	1
GO:0043647	GO:0043647	inositol phosphate metabolic process	1/48	54/18723	0.12961	0.171684	0.0921434	SNCA	1
GO:0060350	GO:0060350	endochondral bone morphogenesis	1/48	54/18723	0.12961	0.171684	0.0921434	COMP	1
GO:2000300	GO:2000300	regulation of synaptic vesicle exocytosis	1/48	54/18723	0.12961	0.171684	0.0921434	LRRK2	1
GO:0003007	GO:0003007	heart morphogenesis	2/48	246/18723	0.131104	0.173568	0.0931547	RYR2/DSP	2
GO:0001755	GO:0001755	neural crest cell migration	1/48	55/18723	0.131848	0.173985	0.0933783	FN1	1
GO:0031113	GO:0031113	regulation of microtubule polymerization	1/48	55/18723	0.131848	0.173985	0.0933783	SNCA	1
GO:0038066	GO:0038066	p38MAPK cascade	1/48	55/18723	0.131848	0.173985	0.0933783	MAP3K5	1
GO:0042220	GO:0042220	response to cocaine	1/48	55/18723	0.131848	0.173985	0.0933783	SNCA	1
GO:0046164	GO:0046164	alcohol catabolic process	1/48	55/18723	0.131848	0.173985	0.0933783	APOE	1
GO:1905517	GO:1905517	macrophage migration	1/48	55/18723	0.131848	0.173985	0.0933783	CCL2	1
GO:0043122	GO:0043122	regulation of I-kappaB kinase/NF-kappaB signaling	2/48	249/18723	0.133697	0.175691	0.0942941	ESR1/HMOX1	2
GO:0046883	GO:0046883	regulation of hormone secretion	2/48	249/18723	0.133697	0.175691	0.0942941	HMGCR/IL6	2
GO:0001912	GO:0001912	positive regulation of leukocyte mediated cytotoxicity	1/48	56/18723	0.13408	0.175691	0.0942941	HLA-DRA	1
GO:0002886	GO:0002886	regulation of myeloid leukocyte mediated immunity	1/48	56/18723	0.13408	0.175691	0.0942941	HMOX1	1
GO:0006687	GO:0006687	glycosphingolipid metabolic process	1/48	56/18723	0.13408	0.175691	0.0942941	GLA	1
GO:0010518	GO:0010518	positive regulation of phospholipase activity	1/48	56/18723	0.13408	0.175691	0.0942941	ESR1	1
GO:0015800	GO:0015800	acidic amino acid transport	1/48	56/18723	0.13408	0.175691	0.0942941	SNCA	1
GO:0022029	GO:0022029	telencephalon cell migration	1/48	56/18723	0.13408	0.175691	0.0942941	LRRK2	1
GO:0030166	GO:0030166	proteoglycan biosynthetic process	1/48	56/18723	0.13408	0.175691	0.0942941	IGF1	1
GO:0045599	GO:0045599	negative regulation of fat cell differentiation	1/48	56/18723	0.13408	0.175691	0.0942941	IL6	1
GO:0046456	GO:0046456	icosanoid biosynthetic process	1/48	56/18723	0.13408	0.175691	0.0942941	PTGIS	1
GO:0048008	GO:0048008	platelet-derived growth factor receptor signaling pathway	1/48	56/18723	0.13408	0.175691	0.0942941	SNCA	1
GO:0050433	GO:0050433	regulation of catecholamine secretion	1/48	56/18723	0.13408	0.175691	0.0942941	SNCA	1
GO:0061448	GO:0061448	connective tissue development	2/48	252/18723	0.136303	0.177938	0.0954998	XBP1/COMP	2
GO:0006611	GO:0006611	protein export from nucleus	1/48	57/18723	0.136307	0.177938	0.0954998	TXN	1
GO:0010883	GO:0010883	regulation of lipid storage	1/48	57/18723	0.136307	0.177938	0.0954998	IL6	1
GO:0033619	GO:0033619	membrane protein proteolysis	1/48	57/18723	0.136307	0.177938	0.0954998	APOE	1
GO:0051155	GO:0051155	positive regulation of striated muscle cell differentiation	1/48	57/18723	0.136307	0.177938	0.0954998	IGF1	1
GO:0051785	GO:0051785	positive regulation of nuclear division	1/48	57/18723	0.136307	0.177938	0.0954998	IGF1	1
GO:1900024	GO:1900024	regulation of substrate adhesion-dependent cell spreading	1/48	57/18723	0.136307	0.177938	0.0954998	APOA1	1
GO:0060828	GO:0060828	regulation of canonical Wnt signaling pathway	2/48	253/18723	0.137174	0.178973	0.0960556	LRRK2/APOE	2
GO:0006839	GO:0006839	mitochondrial transport	2/48	254/18723	0.138046	0.179584	0.0963834	BOK/LRRK2	2
GO:0009165	GO:0009165	nucleotide biosynthetic process	2/48	254/18723	0.138046	0.179584	0.0963834	PTGIS/SNCA	2
GO:0006826	GO:0006826	iron ion transport	1/48	58/18723	0.138528	0.179584	0.0963834	CP	1
GO:0007405	GO:0007405	neuroblast proliferation	1/48	58/18723	0.138528	0.179584	0.0963834	LRRK2	1
GO:0010559	GO:0010559	regulation of glycoprotein biosynthetic process	1/48	58/18723	0.138528	0.179584	0.0963834	IGF1	1
GO:0010574	GO:0010574	regulation of vascular endothelial growth factor production	1/48	58/18723	0.138528	0.179584	0.0963834	IL6	1
GO:0034340	GO:0034340	response to type I interferon	1/48	58/18723	0.138528	0.179584	0.0963834	MX1	1
GO:0042743	GO:0042743	hydrogen peroxide metabolic process	1/48	58/18723	0.138528	0.179584	0.0963834	SNCA	1
GO:0043506	GO:0043506	regulation of JUN kinase activity	1/48	58/18723	0.138528	0.179584	0.0963834	MAP3K5	1
GO:0043525	GO:0043525	positive regulation of neuron apoptotic process	1/48	58/18723	0.138528	0.179584	0.0963834	NUPR1	1
GO:0050432	GO:0050432	catecholamine secretion	1/48	58/18723	0.138528	0.179584	0.0963834	SNCA	1
GO:2000649	GO:2000649	regulation of sodium ion transmembrane transporter activity	1/48	58/18723	0.138528	0.179584	0.0963834	DMD	1
GO:0007611	GO:0007611	learning or memory	2/48	255/18723	0.138919	0.179996	0.0966044	HMGCR/APOE	2
GO:1901293	GO:1901293	nucleoside phosphate biosynthetic process	2/48	256/18723	0.139794	0.181033	0.097161	PTGIS/SNCA	2
GO:0019369	GO:0019369	arachidonic acid metabolic process	1/48	59/18723	0.140743	0.181585	0.0974572	PTGIS	1
GO:0021885	GO:0021885	forebrain cell migration	1/48	59/18723	0.140743	0.181585	0.0974572	LRRK2	1
GO:0033013	GO:0033013	tetrapyrrole metabolic process	1/48	59/18723	0.140743	0.181585	0.0974572	HMOX1	1
GO:0046324	GO:0046324	regulation of glucose import	1/48	59/18723	0.140743	0.181585	0.0974572	IGF1	1
GO:0051055	GO:0051055	negative regulation of lipid biosynthetic process	1/48	59/18723	0.140743	0.181585	0.0974572	APOE	1
GO:0090303	GO:0090303	positive regulation of wound healing	1/48	59/18723	0.140743	0.181585	0.0974572	XBP1	1
GO:2000351	GO:2000351	regulation of endothelial cell apoptotic process	1/48	59/18723	0.140743	0.181585	0.0974572	CCL2	1
GO:0002753	GO:0002753	cytoplasmic pattern recognition receptor signaling pathway	1/48	60/18723	0.142953	0.183366	0.0984131	MAP2K6	1
GO:0010972	GO:0010972	negative regulation of G2/M transition of mitotic cell cycle	1/48	60/18723	0.142953	0.183366	0.0984131	CDK1	1
GO:0031102	GO:0031102	neuron projection regeneration	1/48	60/18723	0.142953	0.183366	0.0984131	APOA1	1
GO:0031638	GO:0031638	zymogen activation	1/48	60/18723	0.142953	0.183366	0.0984131	C1R	1
GO:0031663	GO:0031663	lipopolysaccharide-mediated signaling pathway	1/48	60/18723	0.142953	0.183366	0.0984131	CCL2	1
GO:0033866	GO:0033866	nucleoside bisphosphate biosynthetic process	1/48	60/18723	0.142953	0.183366	0.0984131	SNCA	1
GO:0034030	GO:0034030	ribonucleoside bisphosphate biosynthetic process	1/48	60/18723	0.142953	0.183366	0.0984131	SNCA	1
GO:0034033	GO:0034033	purine nucleoside bisphosphate biosynthetic process	1/48	60/18723	0.142953	0.183366	0.0984131	SNCA	1
GO:0042306	GO:0042306	regulation of protein import into nucleus	1/48	60/18723	0.142953	0.183366	0.0984131	CDK1	1
GO:0051851	GO:0051851	modulation by host of symbiont process	1/48	60/18723	0.142953	0.183366	0.0984131	APOE	1
GO:0060038	GO:0060038	cardiac muscle cell proliferation	1/48	60/18723	0.142953	0.183366	0.0984131	CDK1	1
GO:0051091	GO:0051091	positive regulation of DNA-binding transcription factor activity	2/48	260/18723	0.143306	0.183722	0.098604	ESR1/IL6	2
GO:0030199	GO:0030199	collagen fibril organization	1/48	61/18723	0.145157	0.185411	0.0995107	COMP	1
GO:0040014	GO:0040014	regulation of multicellular organism growth	1/48	61/18723	0.145157	0.185411	0.0995107	IGF1	1
GO:0043954	GO:0043954	cellular component maintenance	1/48	61/18723	0.145157	0.185411	0.0995107	APOE	1
GO:0050994	GO:0050994	regulation of lipid catabolic process	1/48	61/18723	0.145157	0.185411	0.0995107	APOA1	1
GO:0060997	GO:0060997	dendritic spine morphogenesis	1/48	61/18723	0.145157	0.185411	0.0995107	LRRK2	1
GO:0060998	GO:0060998	regulation of dendritic spine development	1/48	61/18723	0.145157	0.185411	0.0995107	APOE	1
GO:2000401	GO:2000401	regulation of lymphocyte migration	1/48	61/18723	0.145157	0.185411	0.0995107	CCL2	1
GO:0043588	GO:0043588	skin development	2/48	263/18723	0.145952	0.186328	0.100003	DSP/COMP	2
GO:0015833	GO:0015833	peptide transport	2/48	264/18723	0.146837	0.186651	0.100176	HMGCR/IL6	2
GO:0032868	GO:0032868	response to insulin	2/48	264/18723	0.146837	0.186651	0.100176	PLN/XBP1	2
GO:0050730	GO:0050730	regulation of peptidyl-tyrosine phosphorylation	2/48	264/18723	0.146837	0.186651	0.100176	IGF1/IL6	2
GO:0007588	GO:0007588	excretion	1/48	62/18723	0.147356	0.186651	0.100176	HMOX1	1
GO:0009311	GO:0009311	oligosaccharide metabolic process	1/48	62/18723	0.147356	0.186651	0.100176	GLA	1
GO:0010573	GO:0010573	vascular endothelial growth factor production	1/48	62/18723	0.147356	0.186651	0.100176	IL6	1
GO:0032613	GO:0032613	interleukin-10 production	1/48	62/18723	0.147356	0.186651	0.100176	IL6	1
GO:0032653	GO:0032653	regulation of interleukin-10 production	1/48	62/18723	0.147356	0.186651	0.100176	IL6	1
GO:0032731	GO:0032731	positive regulation of interleukin-1 beta production	1/48	62/18723	0.147356	0.186651	0.100176	IL6	1
GO:0032757	GO:0032757	positive regulation of interleukin-8 production	1/48	62/18723	0.147356	0.186651	0.100176	IL6	1
GO:0046173	GO:0046173	polyol biosynthetic process	1/48	62/18723	0.147356	0.186651	0.100176	SNCA	1
GO:0046824	GO:0046824	positive regulation of nucleocytoplasmic transport	1/48	62/18723	0.147356	0.186651	0.100176	CDK1	1
GO:0048002	GO:0048002	antigen processing and presentation of peptide antigen	1/48	62/18723	0.147356	0.186651	0.100176	HLA-DRA	1
GO:0060135	GO:0060135	maternal process involved in female pregnancy	1/48	62/18723	0.147356	0.186651	0.100176	ESR1	1
GO:1902750	GO:1902750	negative regulation of cell cycle G2/M phase transition	1/48	62/18723	0.147356	0.186651	0.100176	CDK1	1
GO:0002704	GO:0002704	negative regulation of leukocyte mediated immunity	1/48	63/18723	0.149549	0.188545	0.101193	HMOX1	1
GO:0016239	GO:0016239	positive regulation of macroautophagy	1/48	63/18723	0.149549	0.188545	0.101193	HMOX1	1
GO:0022617	GO:0022617	extracellular matrix disassembly	1/48	63/18723	0.149549	0.188545	0.101193	IL6	1
GO:0031343	GO:0031343	positive regulation of cell killing	1/48	63/18723	0.149549	0.188545	0.101193	HLA-DRA	1
GO:0032233	GO:0032233	positive regulation of actin filament bundle assembly	1/48	63/18723	0.149549	0.188545	0.101193	APOA1	1
GO:0046902	GO:0046902	regulation of mitochondrial membrane permeability	1/48	63/18723	0.149549	0.188545	0.101193	BOK	1
GO:0099601	GO:0099601	regulation of neurotransmitter receptor activity	1/48	63/18723	0.149549	0.188545	0.101193	CCL2	1
GO:1904589	GO:1904589	regulation of protein import	1/48	63/18723	0.149549	0.188545	0.101193	CDK1	1
GO:2000242	GO:2000242	negative regulation of reproductive process	1/48	63/18723	0.149549	0.188545	0.101193	IGF1	1
GO:0001894	GO:0001894	tissue homeostasis	2/48	268/18723	0.150386	0.189502	0.101706	DMD/IL6	2
GO:0030104	GO:0030104	water homeostasis	1/48	64/18723	0.151737	0.190415	0.102196	AQP11	1
GO:0045995	GO:0045995	regulation of embryonic development	1/48	64/18723	0.151737	0.190415	0.102196	CDK1	1
GO:0046888	GO:0046888	negative regulation of hormone secretion	1/48	64/18723	0.151737	0.190415	0.102196	HMGCR	1
GO:0048247	GO:0048247	lymphocyte chemotaxis	1/48	64/18723	0.151737	0.190415	0.102196	CCL2	1
GO:0061178	GO:0061178	regulation of insulin secretion involved in cellular response to glucose stimulus	1/48	64/18723	0.151737	0.190415	0.102196	HMGCR	1
GO:1903018	GO:1903018	regulation of glycoprotein metabolic process	1/48	64/18723	0.151737	0.190415	0.102196	IGF1	1
GO:1903051	GO:1903051	negative regulation of proteolysis involved in cellular protein catabolic process	1/48	64/18723	0.151737	0.190415	0.102196	AQP11	1
GO:1903409	GO:1903409	reactive oxygen species biosynthetic process	1/48	64/18723	0.151737	0.190415	0.102196	SNCA	1
GO:0015909	GO:0015909	long-chain fatty acid transport	1/48	65/18723	0.153919	0.192105	0.103103	APOE	1
GO:0032507	GO:0032507	maintenance of protein location in cell	1/48	65/18723	0.153919	0.192105	0.103103	TXN	1
GO:0033692	GO:0033692	cellular polysaccharide biosynthetic process	1/48	65/18723	0.153919	0.192105	0.103103	IGF1	1
GO:0038034	GO:0038034	signal transduction in absence of ligand	1/48	65/18723	0.153919	0.192105	0.103103	BOK	1
GO:0045453	GO:0045453	bone resorption	1/48	65/18723	0.153919	0.192105	0.103103	IL6	1
GO:0046503	GO:0046503	glycerolipid catabolic process	1/48	65/18723	0.153919	0.192105	0.103103	APOA1	1
GO:0070613	GO:0070613	regulation of protein processing	1/48	65/18723	0.153919	0.192105	0.103103	LRRK2	1
GO:0097192	GO:0097192	extrinsic apoptotic signaling pathway in absence of ligand	1/48	65/18723	0.153919	0.192105	0.103103	BOK	1
GO:1905330	GO:1905330	regulation of morphogenesis of an epithelium	1/48	65/18723	0.153919	0.192105	0.103103	ESR1	1
GO:0048872	GO:0048872	homeostasis of number of cells	2/48	272/18723	0.153952	0.192105	0.103103	HMOX1/IL6	2
GO:0051962	GO:0051962	positive regulation of nervous system development	2/48	272/18723	0.153952	0.192105	0.103103	FN1/IL6	2
GO:0034249	GO:0034249	negative regulation of cellular amide metabolic process	2/48	273/18723	0.154847	0.192924	0.103543	APOE/IGF1	2
GO:0046942	GO:0046942	carboxylic acid transport	2/48	273/18723	0.154847	0.192924	0.103543	SNCA/MAP2K6	2
GO:0098742	GO:0098742	cell-cell adhesion via plasma-membrane adhesion molecules	2/48	273/18723	0.154847	0.192924	0.103543	VCAM1/APOA1	2
GO:0014015	GO:0014015	positive regulation of gliogenesis	1/48	66/18723	0.156096	0.193686	0.103952	IL6	1
GO:0019229	GO:0019229	regulation of vasoconstriction	1/48	66/18723	0.156096	0.193686	0.103952	HMGCR	1
GO:0030193	GO:0030193	regulation of blood coagulation	1/48	66/18723	0.156096	0.193686	0.103952	APOE	1
GO:0045600	GO:0045600	positive regulation of fat cell differentiation	1/48	66/18723	0.156096	0.193686	0.103952	XBP1	1
GO:0050918	GO:0050918	positive chemotaxis	1/48	66/18723	0.156096	0.193686	0.103952	CXCL8	1
GO:0050922	GO:0050922	negative regulation of chemotaxis	1/48	66/18723	0.156096	0.193686	0.103952	CCL2	1
GO:0072678	GO:0072678	T cell migration	1/48	66/18723	0.156096	0.193686	0.103952	CCL2	1
GO:1905953	GO:1905953	negative regulation of lipid localization	1/48	66/18723	0.156096	0.193686	0.103952	IL6	1
GO:0007187	GO:0007187	G protein-coupled receptor signaling pathway, coupled to cyclic nucleotide second messenger	1/48	67/18723	0.158267	0.195582	0.104969	CCL2	1
GO:0035914	GO:0035914	skeletal muscle cell differentiation	1/48	67/18723	0.158267	0.195582	0.104969	NUPR1	1
GO:0043967	GO:0043967	histone H4 acetylation	1/48	67/18723	0.158267	0.195582	0.104969	MUC1	1
GO:0046635	GO:0046635	positive regulation of alpha-beta T cell activation	1/48	67/18723	0.158267	0.195582	0.104969	HLA-DRA	1
GO:0061180	GO:0061180	mammary gland epithelium development	1/48	67/18723	0.158267	0.195582	0.104969	ESR1	1
GO:1902117	GO:1902117	positive regulation of organelle assembly	1/48	67/18723	0.158267	0.195582	0.104969	STX18	1
GO:1903317	GO:1903317	regulation of protein maturation	1/48	67/18723	0.158267	0.195582	0.104969	LRRK2	1
GO:2000514	GO:2000514	regulation of CD4-positive, alpha-beta T cell activation	1/48	67/18723	0.158267	0.195582	0.104969	HLA-DRA	1
GO:1902105	GO:1902105	regulation of leukocyte differentiation	2/48	279/18723	0.160235	0.197756	0.106136	XBP1/HLA-DRA	2
GO:0046637	GO:0046637	regulation of alpha-beta T cell differentiation	1/48	68/18723	0.160432	0.197756	0.106136	HLA-DRA	1
GO:0051148	GO:0051148	negative regulation of muscle cell differentiation	1/48	68/18723	0.160432	0.197756	0.106136	XBP1	1
GO:0051926	GO:0051926	negative regulation of calcium ion transport	1/48	68/18723	0.160432	0.197756	0.106136	PLN	1
GO:1902305	GO:1902305	regulation of sodium ion transmembrane transport	1/48	68/18723	0.160432	0.197756	0.106136	DMD	1
GO:0021700	GO:0021700	developmental maturation	2/48	280/18723	0.161136	0.198523	0.106548	LRRK2/IGF1	2
GO:0006470	GO:0006470	protein dephosphorylation	2/48	281/18723	0.162039	0.199432	0.107036	LRRK2/CDKN3	2
GO:0007249	GO:0007249	I-kappaB kinase/NF-kappaB signaling	2/48	281/18723	0.162039	0.199432	0.107036	ESR1/HMOX1	2
GO:0003143	GO:0003143	embryonic heart tube morphogenesis	1/48	69/18723	0.162593	0.199508	0.107077	RYR2	1
GO:0010611	GO:0010611	regulation of cardiac muscle hypertrophy	1/48	69/18723	0.162593	0.199508	0.107077	IGF1	1
GO:0034605	GO:0034605	cellular response to heat	1/48	69/18723	0.162593	0.199508	0.107077	HMOX1	1
GO:0050805	GO:0050805	negative regulation of synaptic transmission	1/48	69/18723	0.162593	0.199508	0.107077	LRRK2	1
GO:0050810	GO:0050810	regulation of steroid biosynthetic process	1/48	69/18723	0.162593	0.199508	0.107077	APOE	1
GO:1901224	GO:1901224	positive regulation of NIK/NF-kappaB signaling	1/48	69/18723	0.162593	0.199508	0.107077	NR3C2	1
GO:0002381	GO:0002381	immunoglobulin production involved in immunoglobulin-mediated immune response	1/48	70/18723	0.164748	0.20205	0.108441	HLA-DRA	1
GO:0008344	GO:0008344	adult locomotory behavior	1/48	71/18723	0.166897	0.204172	0.10958	SNCA	1
GO:0033555	GO:0033555	multicellular organismal response to stress	1/48	71/18723	0.166897	0.204172	0.10958	APOE	1
GO:0050795	GO:0050795	regulation of behavior	1/48	71/18723	0.166897	0.204172	0.10958	APOE	1
GO:0050818	GO:0050818	regulation of coagulation	1/48	71/18723	0.166897	0.204172	0.10958	APOE	1
GO:0071230	GO:0071230	cellular response to amino acid stimulus	1/48	71/18723	0.166897	0.204172	0.10958	XBP1	1
GO:0000271	GO:0000271	polysaccharide biosynthetic process	1/48	72/18723	0.169041	0.205862	0.110487	IGF1	1
GO:0002534	GO:0002534	cytokine production involved in inflammatory response	1/48	72/18723	0.169041	0.205862	0.110487	IL6	1
GO:0005977	GO:0005977	glycogen metabolic process	1/48	72/18723	0.169041	0.205862	0.110487	IGF1	1
GO:0014743	GO:0014743	regulation of muscle hypertrophy	1/48	72/18723	0.169041	0.205862	0.110487	IGF1	1
GO:0033627	GO:0033627	cell adhesion mediated by integrin	1/48	72/18723	0.169041	0.205862	0.110487	MUC1	1
GO:0042246	GO:0042246	tissue regeneration	1/48	72/18723	0.169041	0.205862	0.110487	IGF1	1
GO:0043903	GO:0043903	regulation of biological process involved in symbiotic interaction	1/48	72/18723	0.169041	0.205862	0.110487	CXCL8	1
GO:1900015	GO:1900015	regulation of cytokine production involved in inflammatory response	1/48	72/18723	0.169041	0.205862	0.110487	IL6	1
GO:1903036	GO:1903036	positive regulation of response to wounding	1/48	72/18723	0.169041	0.205862	0.110487	XBP1	1
GO:0060485	GO:0060485	mesenchyme development	2/48	291/18723	0.171115	0.207532	0.111383	FN1/IL6	2
GO:0006073	GO:0006073	cellular glucan metabolic process	1/48	73/18723	0.171179	0.207532	0.111383	IGF1	1
[truncated: 433 more rows]

## Sheet: GO-CC
	ID	Description	GeneRatio	BgRatio	pvalue	p.adjust	qvalue	geneID	Count
GO:0005788	GO:0005788	endoplasmic reticulum lumen	8/48	313/19550	8.53761e-07	0.000169899	9.97553e-05	APOA1/COL7A1/DNAJC10/FN1/APOE/IL6/CP/SERPINA1	8
GO:0072562	GO:0072562	blood microparticle	5/48	146/19550	2.86737e-05	0.00285304	0.00167515	APOA1/C1R/FN1/APOE/CP	5
GO:0031091	GO:0031091	platelet alpha granule	4/48	91/19550	7.30794e-05	0.0048476	0.00284625	SNCA/FN1/IGF1/SERPINA1	4
GO:0005741	GO:0005741	mitochondrial outer membrane	5/48	205/19550	0.000143309	0.0071296	0.00418612	SNCA/BOK/HMOX1/LRRK2/RSAD2	5
GO:0031968	GO:0031968	organelle outer membrane	5/48	230/19550	0.000244682	0.00745733	0.00437855	SNCA/BOK/HMOX1/LRRK2/RSAD2	5
GO:0019867	GO:0019867	outer membrane	5/48	232/19550	0.00025467	0.00745733	0.00437855	SNCA/BOK/HMOX1/LRRK2/RSAD2	5
GO:0005916	GO:0005916	fascia adherens	2/48	10/19550	0.000262318	0.00745733	0.00437855	DSP/DES	2
GO:0042383	GO:0042383	sarcolemma	4/48	138/19550	0.000363462	0.00900577	0.00528771	VCAM1/RYR2/DMD/DES	4
GO:0034362	GO:0034362	low-density lipoprotein particle	2/48	13/19550	0.000452551	0.00900577	0.00528771	APOA1/APOE	2
GO:0042627	GO:0042627	chylomicron	2/48	13/19550	0.000452551	0.00900577	0.00528771	APOA1/APOE	2
GO:0062023	GO:0062023	collagen-containing extracellular matrix	6/48	425/19550	0.000577485	0.00962931	0.00565381	APOA1/COL7A1/FN1/COMP/APOE/SERPINA1	6
GO:0031093	GO:0031093	platelet alpha granule lumen	3/48	67/19550	0.000595918	0.00962931	0.00565381	FN1/IGF1/SERPINA1	3
GO:0030176	GO:0030176	integral component of endoplasmic reticulum membrane	4/48	162/19550	0.000665511	0.00962931	0.00565381	HSD11B1/UBXN8/RNF183/HLA-DRA	4
GO:0016529	GO:0016529	sarcoplasmic reticulum	3/48	70/19550	0.000677439	0.00962931	0.00565381	ITPR1/RYR2/PLN	3
GO:0031227	GO:0031227	intrinsic component of endoplasmic reticulum membrane	4/48	170/19550	0.000796953	0.0105729	0.00620784	HSD11B1/UBXN8/RNF183/HLA-DRA	4
GO:0016528	GO:0016528	sarcoplasm	3/48	79/19550	0.000963627	0.0109083	0.00640479	ITPR1/RYR2/PLN	3
GO:0034361	GO:0034361	very-low-density lipoprotein particle	2/48	20/19550	0.00109035	0.0109083	0.00640479	APOA1/APOE	2
GO:0034385	GO:0034385	triglyceride-rich plasma lipoprotein particle	2/48	20/19550	0.00109035	0.0109083	0.00640479	APOA1/APOE	2
GO:0034774	GO:0034774	secretory granule lumen	5/48	322/19550	0.00112623	0.0109083	0.00640479	APOA1/FN1/GLA/IGF1/SERPINA1	5
GO:0005901	GO:0005901	caveola	3/48	84/19550	0.00115117	0.0109083	0.00640479	PTGIS/HMOX1/LRRK2	3
GO:0060205	GO:0060205	cytoplasmic vesicle lumen	5/48	325/19550	0.00117357	0.0109083	0.00640479	APOA1/FN1/GLA/IGF1/SERPINA1	5
GO:0031983	GO:0031983	vesicle lumen	5/48	327/19550	0.00120595	0.0109083	0.00640479	APOA1/FN1/GLA/IGF1/SERPINA1	5
GO:0071682	GO:0071682	endocytic vesicle lumen	2/48	23/19550	0.00144508	0.0125031	0.00734114	APOA1/APOE	2
GO:0030134	GO:0030134	COPII-coated ER to Golgi transport vesicle	3/48	94/19550	0.00159188	0.0131993	0.00774993	COL7A1/HLA-DRA/SERPINA1	3
GO:0030658	GO:0030658	transport vesicle membrane	4/48	212/19550	0.00180053	0.0143322	0.00841512	ITPR1/SNCA/LRRK2/HLA-DRA	4
GO:0034364	GO:0034364	high-density lipoprotein particle	2/48	27/19550	0.00199233	0.015249	0.00895338	APOA1/APOE	2
GO:0005640	GO:0005640	nuclear outer membrane	2/48	28/19550	0.00214223	0.015789	0.00927048	SNCA/BOK	2
GO:0005769	GO:0005769	early endosome	5/48	394/19550	0.00272405	0.0193602	0.0113673	VCAM1/APOA1/BOK/HLA-DRA/APOE	5
GO:0044853	GO:0044853	plasma membrane raft	3/48	116/19550	0.00289862	0.0198905	0.0116786	PTGIS/HMOX1/LRRK2	3
GO:0030133	GO:0030133	transport vesicle	5/48	412/19550	0.00329946	0.0218864	0.0128505	ITPR1/SNCA/LRRK2/HLA-DRA/IGF1	5
GO:0034358	GO:0034358	plasma lipoprotein particle	2/48	36/19550	0.00352603	0.0219275	0.0128747	APOA1/APOE	2
GO:1990777	GO:1990777	lipoprotein particle	2/48	36/19550	0.00352603	0.0219275	0.0128747	APOA1/APOE	2
GO:0030018	GO:0030018	Z disc	3/48	130/19550	0.00399452	0.0237033	0.0139173	RYR2/DMD/DES	3
GO:0032994	GO:0032994	protein-lipid complex	2/48	39/19550	0.00412791	0.0237033	0.0139173	APOA1/APOE	2
GO:0005793	GO:0005793	endoplasmic reticulum-Golgi intermediate compartment	3/48	132/19550	0.00416892	0.0237033	0.0139173	COL7A1/FN1/SERPINA1	3
GO:0033017	GO:0033017	sarcoplasmic reticulum membrane	2/48	40/19550	0.00433839	0.0239816	0.0140807	RYR2/PLN	2
GO:0031674	GO:0031674	I band	3/48	141/19550	0.00501088	0.0262412	0.0154074	RYR2/DMD/DES	3
GO:0044306	GO:0044306	neuron projection terminus	3/48	141/19550	0.00501088	0.0262412	0.0154074	SNCA/LRRK2/DMD	3
GO:0031965	GO:0031965	nuclear membrane	4/48	297/19550	0.00600798	0.0305979	0.0179655	ITPR1/SNCA/BOK/MX1	4
GO:0030135	GO:0030135	coated vesicle	4/48	299/19550	0.00615034	0.0305979	0.0179655	COL7A1/HLA-DRA/APOE/SERPINA1	4
GO:0014704	GO:0014704	intercalated disc	2/48	50/19550	0.00670807	0.0325587	0.0191167	DSP/DES	2
GO:0043195	GO:0043195	terminal bouton	2/48	55/19550	0.00806875	0.0382305	0.0224469	SNCA/LRRK2	2
GO:0045121	GO:0045121	membrane raft	4/48	335/19550	0.00910967	0.0412006	0.0241908	PTGIS/HMOX1/LRRK2/DMD	4
GO:0098857	GO:0098857	membrane microdomain	4/48	335/19550	0.00910967	0.0412006	0.0241908	PTGIS/HMOX1/LRRK2/DMD	4
GO:0030669	GO:0030669	clathrin-coated endocytic vesicle membrane	2/48	72/19550	0.0135258	0.0585138	0.0343562	HLA-DRA/APOE	2
GO:0044291	GO:0044291	cell-cell contact zone	2/48	72/19550	0.0135258	0.0585138	0.0343562	DSP/DES	2
GO:0005801	GO:0005801	cis-Golgi network	2/48	73/19550	0.0138852	0.0587907	0.0345187	RNF183/BOK	2
GO:0031301	GO:0031301	integral component of organelle membrane	4/48	387/19550	0.0148286	0.0597412	0.0350768	HSD11B1/UBXN8/RNF183/HLA-DRA	4
GO:0016234	GO:0016234	inclusion body	2/48	76/19550	0.0149883	0.0597412	0.0350768	SNCA/LRRK2	2
GO:0030017	GO:0030017	sarcomere	3/48	211/19550	0.0150104	0.0597412	0.0350768	RYR2/DMD/DES	3
GO:0033116	GO:0033116	endoplasmic reticulum-Golgi intermediate compartment membrane	2/48	77/19550	0.0153641	0.0599501	0.0351995	COL7A1/SERPINA1	2
GO:0098858	GO:0098858	actin-based cell projection	3/48	221/19550	0.0169678	0.0649347	0.0381261	VCAM1/LRRK2/DMD	3
GO:0070382	GO:0070382	exocytic vesicle	3/48	224/19550	0.0175818	0.0660145	0.0387602	SNCA/LRRK2/IGF1	3
GO:0031300	GO:0031300	intrinsic component of organelle membrane	4/48	417/19550	0.0189754	0.0689707	0.0404959	HSD11B1/UBXN8/RNF183/HLA-DRA	4
GO:0030016	GO:0030016	myofibril	3/48	231/19550	0.0190623	0.0689707	0.0404959	RYR2/DMD/DES	3
GO:0043292	GO:0043292	contractile fiber	3/48	239/19550	0.0208369	0.0721924	0.0423875	RYR2/DMD/DES	3
GO:0005902	GO:0005902	microvillus	2/48	91/19550	0.021041	0.0721924	0.0423875	VCAM1/LRRK2	2
GO:0045334	GO:0045334	clathrin-coated endocytic vesicle	2/48	91/19550	0.021041	0.0721924	0.0423875	HLA-DRA/APOE	2
GO:0055038	GO:0055038	recycling endosome membrane	2/48	92/19550	0.0214753	0.0724338	0.0425292	BOK/NDRG1	2
GO:0005604	GO:0005604	basement membrane	2/48	96/19550	0.0232498	0.0758476	0.0445336	COL7A1/FN1	2
GO:1902911	GO:1902911	protein kinase complex	2/48	96/19550	0.0232498	0.0758476	0.0445336	CDK1/MAP3K5	2
GO:0034663	GO:0034663	endoplasmic reticulum chaperone complex	1/48	10/19550	0.0242885	0.0767207	0.0450463	DNAJC10	1
GO:0097550	GO:0097550	transcription preinitiation complex	1/48	10/19550	0.0242885	0.0767207	0.0450463	ESR1	1
GO:0032588	GO:0032588	trans-Golgi network membrane	2/48	100/19550	0.0250827	0.0779915	0.0457924	BOK/HLA-DRA	2
GO:0005802	GO:0005802	trans-Golgi network	3/48	259/19550	0.02566	0.0780937	0.0458524	BOK/LRRK2/HLA-DRA	3
GO:0031094	GO:0031094	platelet dense tubular network	1/48	11/19550	0.0266853	0.0780937	0.0458524	ITPR1	1
GO:0044754	GO:0044754	autolysosome	1/48	11/19550	0.0266853	0.0780937	0.0458524	LRRK2	1
GO:0099523	GO:0099523	presynaptic cytosol	1/48	11/19550	0.0266853	0.0780937	0.0458524	LRRK2	1
GO:0005635	GO:0005635	nuclear envelope	4/48	468/19550	0.0275506	0.0794576	0.0466532	ITPR1/SNCA/BOK/MX1	4
GO:0030175	GO:0030175	filopodium	2/48	107/19550	0.0284272	0.0801834	0.0470794	VCAM1/DMD	2
GO:1990909	GO:1990909	Wnt signalosome	1/48	12/19550	0.0290764	0.0801834	0.0470794	LRRK2	1
GO:0030672	GO:0030672	synaptic vesicle membrane	2/48	109/19550	0.029414	0.0801834	0.0470794	SNCA/LRRK2	2
GO:0099501	GO:0099501	exocytic vesicle membrane	2/48	109/19550	0.029414	0.0801834	0.0470794	SNCA/LRRK2	2
GO:0005743	GO:0005743	mitochondrial inner membrane	4/48	495/19550	0.0328984	0.0874912	0.0513702	SNCA/BOK/LRRK2/RSAD2	4
GO:0030665	GO:0030665	clathrin-coated vesicle membrane	2/48	116/19550	0.0329741	0.0874912	0.0513702	HLA-DRA/APOE	2
GO:0043679	GO:0043679	axon terminus	2/48	122/19550	0.0361534	0.0946648	0.0555821	SNCA/LRRK2	2
GO:0140534	GO:0140534	endoplasmic reticulum protein-containing complex	2/48	125/19550	0.037786	0.0976546	0.0573376	DNAJC10/MAP3K5	2
GO:0030667	GO:0030667	secretory granule membrane	3/48	311/19550	0.0407735	0.098171	0.0576407	ITPR1/SNCA/DSP	3
GO:0005767	GO:0005767	secondary lysosome	1/48	17/19550	0.0409457	0.098171	0.0576407	LRRK2	1
GO:0031092	GO:0031092	platelet alpha granule membrane	1/48	17/19550	0.0409457	0.098171	0.0576407	SNCA	1
GO:0031527	GO:0031527	filopodium membrane	1/48	17/19550	0.0409457	0.098171	0.0576407	DMD	1
GO:0042613	GO:0042613	MHC class II protein complex	1/48	17/19550	0.0409457	0.098171	0.0576407	HLA-DRA	1
GO:0043083	GO:0043083	synaptic cleft	1/48	17/19550	0.0409457	0.098171	0.0576407	APOE	1
GO:0043034	GO:0043034	costamere	1/48	18/19550	0.0433025	0.101379	0.0595241	DMD	1
GO:0090533	GO:0090533	cation-transporting ATPase complex	1/48	18/19550	0.0433025	0.101379	0.0595241	PLN	1
GO:0016010	GO:0016010	dystrophin-associated glycoprotein complex	1/48	19/19550	0.0456536	0.104426	0.0613133	DMD	1
GO:0090665	GO:0090665	glycoprotein complex	1/48	19/19550	0.0456536	0.104426	0.0613133	DMD	1
GO:0030139	GO:0030139	endocytic vesicle	3/48	336/19550	0.0493374	0.108885	0.0639314	APOA1/HLA-DRA/APOE	3
GO:0098978	GO:0098978	glutamatergic synapse	3/48	338/19550	0.050058	0.108885	0.0639314	LRRK2/NDRG1/APOE	3
GO:0042827	GO:0042827	platelet dense granule	1/48	21/19550	0.0503388	0.108885	0.0639314	ITPR1	1
GO:0098644	GO:0098644	complex of collagen trimers	1/48	21/19550	0.0503388	0.108885	0.0639314	COL7A1	1
GO:0099522	GO:0099522	cytosolic region	1/48	21/19550	0.0503388	0.108885	0.0639314	LRRK2	1
GO:0035327	GO:0035327	transcriptionally active chromatin	1/48	24/19550	0.0573244	0.121357	0.0712543	ESR1	1
GO:0098533	GO:0098533	ATPase dependent transmembrane transport complex	1/48	24/19550	0.0573244	0.121357	0.0712543	PLN	1
GO:0030057	GO:0030057	desmosome	1/48	25/19550	0.0596417	0.123632	0.0725903	DSP	1
GO:0042611	GO:0042611	MHC protein complex	1/48	25/19550	0.0596417	0.123632	0.0725903	HLA-DRA	1
GO:0005963	GO:0005963	magnesium-dependent protein serine/threonine phosphatase complex	1/48	26/19550	0.0619535	0.1271	0.0746266	ITPR1	1
GO:0031901	GO:0031901	early endosome membrane	2/48	173/19550	0.0673963	0.134336	0.0788747	BOK/HLA-DRA	2
GO:0098791	GO:0098791	Golgi apparatus subcompartment	3/48	384/19550	0.0680336	0.134336	0.0788747	BOK/LRRK2/HLA-DRA	3
GO:0002102	GO:0002102	podosome	1/48	29/19550	0.0688555	0.134336	0.0788747	VCAM1	1
GO:0071556	GO:0071556	integral component of lumenal side of endoplasmic reticulum membrane	1/48	29/19550	0.0688555	0.134336	0.0788747	HLA-DRA	1
GO:0098553	GO:0098553	lumenal side of endoplasmic reticulum membrane	1/48	29/19550	0.0688555	0.134336	0.0788747	HLA-DRA	1
GO:0030426	GO:0030426	growth cone	2/48	177/19550	0.0701291	0.135492	0.0795537	SNCA/LRRK2	2
GO:0005765	GO:0005765	lysosomal membrane	3/48	395/19550	0.0727174	0.136856	0.0803544	RNF183/HLA-DRA/CP	3
GO:0098852	GO:0098852	lytic vacuole membrane	3/48	395/19550	0.0727174	0.136856	0.0803544	RNF183/HLA-DRA/CP	3
GO:0030662	GO:0030662	coated vesicle membrane	2/48	181/19550	0.0728981	0.136856	0.0803544	HLA-DRA/APOE	2
GO:0030427	GO:0030427	site of polarized growth	2/48	183/19550	0.0742958	0.138176	0.0811297	SNCA/LRRK2	2
GO:0101002	GO:0101002	ficolin-1-rich granule	2/48	185/19550	0.0757023	0.139489	0.0819002	DSP/SERPINA1	2
GO:0005790	GO:0005790	smooth endoplasmic reticulum	1/48	33/19550	0.0779808	0.141074	0.0828312	RYR2	1
GO:0070971	GO:0070971	endoplasmic reticulum exit site	1/48	33/19550	0.0779808	0.141074	0.0828312	LRRK2	1
GO:0032839	GO:0032839	dendrite cytoplasm	1/48	34/19550	0.0802484	0.143869	0.084472	LRRK2	1
GO:0030666	GO:0030666	endocytic vesicle membrane	2/48	193/19550	0.0814129	0.144653	0.0849326	HLA-DRA/APOE	2
GO:0055037	GO:0055037	recycling endosome	2/48	195/19550	0.0828611	0.145913	0.0856722	BOK/NDRG1	2
GO:0030136	GO:0030136	clathrin-coated vesicle	2/48	196/19550	0.0835883	0.145913	0.0856722	HLA-DRA/APOE	2
GO:0098576	GO:0098576	lumenal side of membrane	1/48	36/19550	0.0847672	0.146684	0.086125	HLA-DRA	1
GO:0032993	GO:0032993	protein-DNA complex	2/48	199/19550	0.0857816	0.14716	0.0864043	ESR1/NUPR1	2
GO:0005874	GO:0005874	microtubule	3/48	429/19550	0.0880811	0.149813	0.0879622	CDK1/MX1/NDRG1	3
GO:0045177	GO:0045177	apical part of cell	3/48	435/19550	0.0909262	0.152121	0.0893174	VCAM1/MUC1/FN1	3
GO:0008021	GO:0008021	synaptic vesicle	2/48	206/19550	0.090967	0.152121	0.0893174	SNCA/LRRK2	2
GO:0005774	GO:0005774	vacuolar membrane	3/48	444/19550	0.0952662	0.157983	0.0927591	RNF183/HLA-DRA/CP	3
GO:0000307	GO:0000307	cyclin-dependent protein kinase holoenzyme complex	1/48	42/19550	0.0981937	0.161492	0.0948195	CDK1	1
GO:0005882	GO:0005882	intermediate filament	2/48	217/19550	0.0992977	0.161969	0.0950996	DSP/DES	2
GO:0001772	GO:0001772	immunological synapse	1/48	44/19550	0.102626	0.166038	0.0974883	HLA-DRA	1
GO:0001533	GO:0001533	cornified envelope	1/48	45/19550	0.104834	0.168242	0.0987829	DSP	1
GO:0008287	GO:0008287	protein serine/threonine phosphatase complex	1/48	48/19550	0.111427	0.174599	0.102515	ITPR1	1
GO:0031201	GO:0031201	SNARE complex	1/48	48/19550	0.111427	0.174599	0.102515	STX18	1
GO:1903293	GO:1903293	phosphatase complex	1/48	48/19550	0.111427	0.174599	0.102515	ITPR1	1
GO:0005759	GO:0005759	mitochondrial matrix	3/48	480/19550	0.113456	0.176389	0.103566	SNCA/LRRK2/CDK1	3
GO:0061695	GO:0061695	transferase complex, transferring phosphorus-containing groups	2/48	239/19550	0.116566	0.179818	0.10558	CDK1/MAP3K5	2
GO:0005911	GO:0005911	cell-cell junction	3/48	494/19550	0.120869	0.185023	0.108636	DSP/NDRG1/DES	3
GO:0045111	GO:0045111	intermediate filament cytoskeleton	2/48	258/19550	0.132048	0.200593	0.117777	DSP/DES	2
GO:0005637	GO:0005637	nuclear inner membrane	1/48	61/19550	0.139451	0.207095	0.121595	ITPR1	1
GO:0016328	GO:0016328	lateral plasma membrane	1/48	61/19550	0.139451	0.207095	0.121595	DMD	1
GO:0101003	GO:0101003	ficolin-1-rich granule membrane	1/48	61/19550	0.139451	0.207095	0.121595	DSP	1
GO:0012507	GO:0012507	ER to Golgi transport vesicle membrane	1/48	62/19550	0.141571	0.208686	0.122529	HLA-DRA	1
GO:0005771	GO:0005771	multivesicular body	1/48	64/19550	0.145794	0.211739	0.124322	LRRK2	1
GO:0005778	GO:0005778	peroxisomal membrane	1/48	65/19550	0.147898	0.211739	0.124322	HMGCR	1
GO:0031903	GO:0031903	microbody membrane	1/48	65/19550	0.147898	0.211739	0.124322	HMGCR	1
GO:0034704	GO:0034704	calcium channel complex	1/48	65/19550	0.147898	0.211739	0.124322	RYR2	1
GO:0005770	GO:0005770	late endosome	2/48	282/19550	0.152236	0.216393	0.127054	LRRK2/HLA-DRA	2
GO:0031594	GO:0031594	neuromuscular junction	1/48	70/19550	0.158343	0.223477	0.131214	DES	1
GO:0005876	GO:0005876	spindle microtubule	1/48	72/19550	0.162486	0.22621	0.132819	CDK1	1
GO:0150034	GO:0150034	distal axon	2/48	294/19550	0.162553	0.22621	0.132819	SNCA/LRRK2	2
GO:0045171	GO:0045171	intercellular bridge	1/48	75/19550	0.168663	0.233083	0.136854	NUPR1	1
GO:0005938	GO:0005938	cell cortex	2/48	308/19550	0.174749	0.238248	0.139886	SNCA/DMD	2
GO:0098685	GO:0098685	Schaffer collateral - CA1 synapse	1/48	78/19550	0.174795	0.238248	0.139886	ITPR1	1
GO:0030864	GO:0030864	cortical actin cytoskeleton	1/48	79/19550	0.176829	0.239381	0.140552	DMD	1
GO:1902554	GO:1902554	serine/threonine protein kinase complex	1/48	81/19550	0.180883	0.243214	0.142802	CDK1	1
GO:0005791	GO:0005791	rough endoplasmic reticulum	1/48	82/19550	0.182902	0.244279	0.143428	SNCA	1
GO:0005758	GO:0005758	mitochondrial intermembrane space	1/48	86/19550	0.190932	0.253303	0.148726	SNCA	1
GO:0005581	GO:0005581	collagen trimer	1/48	87/19550	0.192927	0.254255	0.149285	COL7A1	1
GO:0035578	GO:0035578	azurophil granule lumen	1/48	91/19550	0.20086	0.262968	0.154401	GLA	1
GO:0120111	GO:0120111	neuron projection cytoplasm	1/48	93/19550	0.204798	0.266371	0.156399	LRRK2	1
GO:0005798	GO:0005798	Golgi-associated vesicle	1/48	96/19550	0.210669	0.268738	0.157788	LRRK2	1
GO:0005811	GO:0005811	lipid droplet	1/48	96/19550	0.210669	0.268738	0.157788	RSAD2	1
GO:0031970	GO:0031970	organelle envelope lumen	1/48	96/19550	0.210669	0.268738	0.157788	SNCA	1
GO:0043202	GO:0043202	lysosomal lumen	1/48	97/19550	0.212616	0.269494	0.158233	GLA	1
GO:0005776	GO:0005776	autophagosome	1/48	100/19550	0.218431	0.275112	0.161531	LRRK2	1
GO:0005796	GO:0005796	Golgi lumen	1/48	104/19550	0.226118	0.281196	0.165103	MUC1	1
GO:1902495	GO:1902495	transmembrane transporter complex	2/48	366/19550	0.226593	0.281196	0.165103	RYR2/PLN	2
GO:0016324	GO:0016324	apical plasma membrane	2/48	367/19550	0.2275	0.281196	0.165103	MUC1/FN1	2
GO:0030863	GO:0030863	cortical cytoskeleton	1/48	108/19550	0.233731	0.287114	0.168578	DMD	1
GO:1990351	GO:1990351	transporter complex	2/48	381/19550	0.240225	0.293281	0.172199	RYR2/PLN	2
GO:1904813	GO:1904813	ficolin-1-rich granule lumen	1/48	124/19550	0.263458	0.319683	0.187701	SERPINA1	1
GO:0009897	GO:0009897	external side of plasma membrane	2/48	421/19550	0.276747	0.333774	0.195974	VCAM1/MAP3K5	2
GO:0001650	GO:0001650	fibrillar center	1/48	140/19550	0.292054	0.350087	0.205553	RSAD2	1
GO:0005777	GO:0005777	peroxisome	1/48	142/19550	0.295551	0.350087	0.205553	HMGCR	1
GO:0042579	GO:0042579	microbody	1/48	142/19550	0.295551	0.350087	0.205553	HMGCR	1
GO:0031902	GO:0031902	late endosome membrane	1/48	146/19550	0.302495	0.356192	0.209137	HLA-DRA	1
GO:0005766	GO:0005766	primary lysosome	1/48	155/19550	0.317874	0.369924	0.217199	GLA	1
GO:0042582	GO:0042582	azurophil granule	1/48	155/19550	0.317874	0.369924	0.217199	GLA	1
GO:0043204	GO:0043204	perikaryon	1/48	158/19550	0.322926	0.373618	0.219369	LRRK2	1
GO:0072686	GO:0072686	mitotic spindle	1/48	161/19550	0.327942	0.376963	0.221332	CDK1	1
GO:0000781	GO:0000781	chromosome, telomeric region	1/48	162/19550	0.329606	0.376963	0.221332	CDK1	1
GO:0070820	GO:0070820	tertiary granule	1/48	164/19550	0.332921	0.378579	0.222281	DSP	1
GO:0005912	GO:0005912	adherens junction	1/48	170/19550	0.342772	0.387566	0.227558	NDRG1	1
GO:0005775	GO:0005775	vacuolar lumen	1/48	174/19550	0.349259	0.39267	0.230555	GLA	1
GO:0030496	GO:0030496	midbody	1/48	196/19550	0.383836	0.428421	0.251546	CDK1	1
GO:0098562	GO:0098562	cytoplasmic side of membrane	1/48	197/19550	0.385364	0.428421	0.251546	LRRK2	1
GO:0034703	GO:0034703	cation channel complex	1/48	210/19550	0.404895	0.447634	0.262827	RYR2	1
GO:0032838	GO:0032838	plasma membrane bounded cell projection cytoplasm	1/48	226/19550	0.428101	0.470675	0.276355	LRRK2	1
GO:0016323	GO:0016323	basolateral plasma membrane	1/48	231/19550	0.435169	0.475817	0.279374	DSP	1
GO:0005840	GO:0005840	ribosome	1/48	240/19550	0.447678	0.486819	0.285834	SNCA	1
GO:0009925	GO:0009925	basal plasma membrane	1/48	257/19550	0.470568	0.50893	0.298816	DSP	1
GO:0099568	GO:0099568	cytoplasmic region	1/48	271/19550	0.48872	0.525704	0.308665	LRRK2	1
GO:0045178	GO:0045178	basal part of cell	1/48	276/19550	0.495054	0.52816	0.310107	DSP	1
GO:0045211	GO:0045211	postsynaptic membrane	1/48	277/19550	0.496311	0.52816	0.310107	DMD	1
GO:0034702	GO:0034702	ion channel complex	1/48	282/19550	0.502553	0.531958	0.312337	RYR2	1
GO:0000151	GO:0000151	ubiquitin ligase complex	1/48	301/19550	0.525588	0.553397	0.324925	UBXN8	1
GO:0098802	GO:0098802	plasma membrane signaling receptor complex	1/48	306/19550	0.531475	0.55665	0.326835	IL6	1
GO:0014069	GO:0014069	postsynaptic density	1/48	330/19550	0.558748	0.582151	0.341808	ITPR1	1
GO:0032279	GO:0032279	asymmetric synapse	1/48	335/19550	0.564231	0.584802	0.343364	ITPR1	1
GO:0031253	GO:0031253	cell projection membrane	1/48	346/19550	0.57606	0.593078	0.348223	DMD	1
GO:0098687	GO:0098687	chromosomal region	1/48	348/19550	0.578176	0.593078	0.348223	CDK1	1
GO:0099572	GO:0099572	postsynaptic specialization	1/48	356/19550	0.58654	0.598572	0.351449	ITPR1	1
GO:0098984	GO:0098984	neuron to neuron synapse	1/48	361/19550	0.591685	0.600741	0.352723	ITPR1	1
GO:0097060	GO:0097060	synaptic membrane	1/48	384/19550	0.614554	0.620793	0.364496	DMD	1
GO:0005819	GO:0005819	spindle	1/48	391/19550	0.621262	0.624399	0.366614	CDK1	1
GO:0030055	GO:0030055	cell-substrate junction	1/48	425/19550	0.65225	0.65225	0.382966	DMD	1

## Sheet: GO-MF
	ONTOLOGY	ID	Description	GeneRatio	BgRatio	pvalue	p.adjust	qvalue	geneID	Count
GO:0140677	MF	GO:0140677	molecular function activator activity	5/48	150/18368	4.38337e-05	0.0114844	0.00756708	APOA1/DNAJC10/MAP2K6/NUPR1/APOE	5
GO:0043394	MF	GO:0043394	proteoglycan binding	3/48	36/18368	0.000112552	0.0116937	0.00770495	FN1/COMP/APOE	3
GO:0005496	MF	GO:0005496	steroid binding	4/48	100/18368	0.000133897	0.0116937	0.00770495	ESR1/HSD11B1/APOA1/NR3C2	4
GO:0140678	MF	GO:0140678	molecular function inhibitor activity	4/48	128/18368	0.0003453	0.0189848	0.0125091	ITPR1/APOA1/PLN/LRRK2	4
GO:0002162	MF	GO:0002162	dystroglycan binding	2/48	11/18368	0.000362305	0.0189848	0.0125091	AGR3/DMD	2
GO:0016667	MF	GO:0016667	oxidoreductase activity, acting on a sulfur group of donors	3/48	57/18368	0.000443824	0.0193803	0.0127697	MSRB3/TXN/DNAJC10	3
GO:0005178	MF	GO:0005178	integrin binding	4/48	144/18368	0.000539315	0.0201858	0.0133004	VCAM1/FN1/COMP/IGF1	4
GO:0004857	MF	GO:0004857	enzyme inhibitor activity	3/48	70/18368	0.000810787	0.0232384	0.0153117	APOA1/PLN/LRRK2	3
GO:0015278	MF	GO:0015278	calcium-release channel activity	2/48	17/18368	0.00088696	0.0232384	0.0153117	ITPR1/RYR2	2
GO:0043395	MF	GO:0043395	heparan sulfate proteoglycan binding	2/48	17/18368	0.00088696	0.0232384	0.0153117	COMP/APOE	2
GO:0120020	MF	GO:0120020	cholesterol transfer activity	2/48	22/18368	0.00149403	0.0329232	0.0216931	APOA1/APOE	2
GO:0051117	MF	GO:0051117	ATPase binding	3/48	89/18368	0.00162465	0.0329232	0.0216931	ESR1/PLN/DNAJC10	3
GO:0120015	MF	GO:0120015	sterol transfer activity	2/48	23/18368	0.00163359	0.0329232	0.0216931	APOA1/APOE	2
GO:0003707	MF	GO:0003707	steroid hormone receptor activity	2/48	24/18368	0.00177914	0.0330449	0.0217732	ESR1/NR3C2	2
GO:0099604	MF	GO:0099604	ligand-gated calcium channel activity	2/48	26/18368	0.00208803	0.0330449	0.0217732	ITPR1/RYR2	2
GO:0004709	MF	GO:0004709	MAP kinase kinase kinase activity	2/48	27/18368	0.00225133	0.0330449	0.0217732	LRRK2/MAP3K5	2
GO:0070325	MF	GO:0070325	lipoprotein particle receptor binding	2/48	28/18368	0.00242048	0.0330449	0.0217732	APOA1/APOE	2
GO:0005200	MF	GO:0005200	structural constituent of cytoskeleton	3/48	103/18368	0.0024662	0.0330449	0.0217732	DSP/DMD/DES	3
GO:0051087	MF	GO:0051087	chaperone binding	3/48	107/18368	0.00274776	0.0330449	0.0217732	DNAJC10/FN1/CP	3
GO:0005217	MF	GO:0005217	intracellular ligand-gated ion channel activity	2/48	30/18368	0.00277622	0.0330449	0.0217732	ITPR1/RYR2	2
GO:0071813	MF	GO:0071813	lipoprotein particle binding	2/48	31/18368	0.00296275	0.0330449	0.0217732	APOA1/APOE	2
GO:0071814	MF	GO:0071814	protein-lipid complex binding	2/48	31/18368	0.00296275	0.0330449	0.0217732	APOA1/APOE	2
GO:0008047	MF	GO:0008047	enzyme activator activity	3/48	110/18368	0.00297144	0.0330449	0.0217732	APOA1/NUPR1/APOE	3
GO:0061134	MF	GO:0061134	peptidase regulator activity	4/48	230/18368	0.00302701	0.0330449	0.0217732	SNCA/COL7A1/FN1/SERPINA1	4
GO:0015248	MF	GO:0015248	sterol transporter activity	2/48	36/18368	0.00398082	0.041719	0.0274886	APOA1/APOE	2
GO:0015035	MF	GO:0015035	protein-disulfide reductase activity	2/48	37/18368	0.00420131	0.0423363	0.0278953	TXN/DNAJC10	2
GO:0031072	MF	GO:0031072	heat shock protein binding	3/48	129/18368	0.00464833	0.045106	0.0297203	SNCA/APOA1/DNAJC10	3
GO:1901681	MF	GO:1901681	sulfur compound binding	4/48	265/18368	0.00500866	0.0457961	0.030175	RYR2/FN1/COMP/APOE	4
GO:0002020	MF	GO:0002020	protease binding	3/48	135/18368	0.00527524	0.0457961	0.030175	FN1/COMP/SERPINA1	3
GO:0015036	MF	GO:0015036	disulfide oxidoreductase activity	2/48	42/18368	0.00538651	0.0457961	0.030175	TXN/DNAJC10	2
GO:0008017	MF	GO:0008017	microtubule binding	4/48	271/18368	0.00541863	0.0457961	0.030175	SNCA/LRRK2/MX1/NDRG1	4
GO:0030544	MF	GO:0030544	Hsp70 protein binding	2/48	43/18368	0.0056399	0.0461767	0.0304258	SNCA/DNAJC10	2
GO:0048156	MF	GO:0048156	tau protein binding	2/48	45/18368	0.00616279	0.0489288	0.0322392	SNCA/APOE	2

## Sheet: KEGG
	ID	Description	GeneRatio	BgRatio	pvalue	p.adjust	qvalue	geneID	Count
hsa05417	hsa05417	Lipid and atherosclerosis	9/41	215/8146	8.84142e-07	0.000162682	0.000125641	3708/7412/335/6347/5608/7494/4217/3569/3576	9
hsa05144	hsa05144	Malaria	5/41	50/8146	4.50442e-06	0.000414407	0.000320051	7412/6347/1311/3569/3576	5
hsa05418	hsa05418	Fluid shear stress and atherosclerosis	6/41	139/8146	6.09447e-05	0.00370809	0.0028638	7412/3162/6347/7295/5608/4217	6
hsa05410	hsa05410	Hypertrophic cardiomyopathy	5/41	90/8146	8.06107e-05	0.00370809	0.0028638	6262/1756/3479/1674/3569	5
hsa05414	hsa05414	Dilated cardiomyopathy	5/41	96/8146	0.000109657	0.00403539	0.00311658	6262/5350/1756/3479/1674	5
hsa04933	hsa04933	AGE-RAGE signaling pathway in diabetic complications	5/41	100/8146	0.000133088	0.00408136	0.00315208	7412/6347/2335/3569/3576	5
hsa05164	hsa05164	Influenza A	6/41	171/8146	0.000191562	0.00503534	0.00388885	6347/91543/4599/3122/3569/3576	6
hsa04668	hsa04668	TNF signaling pathway	5/41	112/8146	0.000226877	0.00521817	0.00403005	7412/6347/5608/4217/3569	5
hsa05412	hsa05412	Arrhythmogenic right ventricular cardiomyopathy	4/41	77/8146	0.000573295	0.0106005	0.00818689	6262/1832/1756/1674	4
hsa05135	hsa05135	Yersinia infection	5/41	137/8146	0.000576114	0.0106005	0.00818689	6347/5608/2335/3569/3576	5
hsa05143	hsa05143	African trypanosomiasis	3/41	37/8146	0.000816591	0.0136593	0.0105493	7412/335/3569	3
hsa04218	hsa04218	Cellular senescence	5/41	156/8146	0.00103764	0.0159104	0.0122878	3708/983/5608/3569/3576	5
hsa05323	hsa05323	Rheumatoid arthritis	4/41	93/8146	0.0011672	0.0165203	0.0127588	6347/3122/3569/3576	4
hsa05012	hsa05012	Parkinson disease	6/41	266/8146	0.00196986	0.0254584	0.0196618	3708/6622/120892/7295/7494/4217	6
hsa04621	hsa04621	NOD-like receptor signaling pathway	5/41	184/8146	0.00215779	0.0254584	0.0196618	3708/6347/7295/3569/3576	5
hsa05022	hsa05022	Pathways of neurodegeneration - multiple diseases	8/41	476/8146	0.00221378	0.0254584	0.0196618	3708/6262/6622/120892/5608/7494/4217/3569	8
hsa05163	hsa05163	Human cytomegalovirus infection	5/41	225/8146	0.00512423	0.0554622	0.0428341	3708/6347/5608/3569/3576	5
hsa04936	hsa04936	Alcoholic liver disease	4/41	142/8146	0.0054358	0.055566	0.0429142	5608/4217/3569/3576	4
hsa05171	hsa05171	Coronavirus disease - COVID-19	5/41	232/8146	0.00582852	0.0564446	0.0435928	6347/715/4599/3569/3576	5
hsa05133	hsa05133	Pertussis	3/41	76/8146	0.00645071	0.0593465	0.045834	715/3569/3576	3
hsa04145	hsa04145	Phagosome	4/41	152/8146	0.00690297	0.0604832	0.0467118	53407/715/3122/1311	4
hsa04932	hsa04932	Non-alcoholic fatty liver disease	4/41	155/8146	0.00738967	0.0618045	0.0477323	7494/4217/3569/3576	4
hsa04141	hsa04141	Protein processing in endoplasmic reticulum	4/41	171/8146	0.0103712	0.0829699	0.0640786	7993/54431/7494/4217	4
hsa04657	hsa04657	IL-17 signaling pathway	3/41	94/8146	0.0115564	0.0861803	0.066558	6347/3569/3576	3
hsa05010	hsa05010	Alzheimer disease	6/41	384/8146	0.0117093	0.0861803	0.066558	3708/6622/7494/4217/348/3569	6
hsa04750	hsa04750	Inflammatory mediator regulation of TRP channels	3/41	98/8146	0.0129326	0.0885602	0.068396	3708/5608/3479	3
hsa04061	hsa04061	Viral protein interaction with cytokine and cytokine receptor	3/41	100/8146	0.0136545	0.0885602	0.068396	6347/3569/3576	3
hsa05142	hsa05142	Chagas disease	3/41	102/8146	0.0143991	0.0885602	0.068396	6347/3569/3576	3
hsa05146	hsa05146	Amoebiasis	3/41	102/8146	0.0143991	0.0885602	0.068396	2335/3569/3576	3
hsa04960	hsa04960	Aldosterone-regulated sodium reabsorption	2/41	37/8146	0.0147278	0.0885602	0.068396	4306/3479	2
hsa04620	hsa04620	Toll-like receptor signaling pathway	3/41	104/8146	0.0151665	0.0885602	0.068396	5608/3569/3576	3
hsa05202	hsa05202	Transcriptional misregulation in cancer	4/41	193/8146	0.0156116	0.0885602	0.068396	26471/3479/3569/3576	4
hsa05167	hsa05167	Kaposi sarcoma-associated herpesvirus infection	4/41	194/8146	0.0158831	0.0885602	0.068396	3708/5608/3569/3576	4
hsa04066	hsa04066	HIF-1 signaling pathway	3/41	109/8146	0.0171851	0.0930018	0.0718264	3162/3479/3569	3
hsa04216	hsa04216	Ferroptosis	2/41	41/8146	0.0179055	0.0941315	0.0726988	3162/1356	2
hsa05332	hsa05332	Graft-versus-host disease	2/41	42/8146	0.0187414	0.0948246	0.0732341	3122/3569	2
hsa05205	hsa05205	Proteoglycans in cancer	4/41	205/8146	0.019068	0.0948246	0.0732341	3708/2099/2335/3479	4
hsa00860	hsa00860	Porphyrin metabolism	2/41	43/8146	0.0195937	0.0948748	0.0732729	3162/1356	2
hsa04935	hsa04935	Growth hormone synthesis, secretion and action	3/41	119/8146	0.0216552	0.102168	0.0789056	3708/5608/3479	3
hsa04672	hsa04672	Intestinal immune network for IgA production	2/41	49/8146	0.0250391	0.11518	0.0889547	3122/3569	2
hsa04979	hsa04979	Cholesterol metabolism	2/41	50/8146	0.0260004	0.116685	0.0901169	335/348	2
hsa04114	hsa04114	Oocyte meiosis	3/41	131/8146	0.0277856	0.121728	0.0940116	3708/983/3479	3
hsa05134	hsa05134	Legionellosis	2/41	57/8146	0.033137	0.141796	0.10951	3569/3576	2
hsa05017	hsa05017	Spinocerebellar ataxia	3/41	143/8146	0.0347509	0.142522	0.110072	3708/7494/4217	3
hsa05132	hsa05132	Salmonella infection	4/41	249/8146	0.0356339	0.142522	0.110072	7295/5608/3569/3576	4
hsa04730	hsa04730	Long-term depression	2/41	60/8146	0.0364051	0.142522	0.110072	3708/3479	2
hsa05416	hsa05416	Viral myocarditis	2/41	60/8146	0.0364051	0.142522	0.110072	1756/3122	2
hsa05321	hsa05321	Inflammatory bowel disease	2/41	65/8146	0.0421156	0.161443	0.124684	3122/3569	2
hsa05161	hsa05161	Hepatitis B	3/41	162/8146	0.0474605	0.178219	0.13764	5608/3569/3576	3
hsa04115	hsa04115	p53 signaling pathway	2/41	73/8146	0.0518959	0.190977	0.147494	983/3479	2
hsa01521	hsa01521	EGFR tyrosine kinase inhibitor resistance	2/41	79/8146	0.0597126	0.215434	0.166382	3479/3569	2
hsa04610	hsa04610	Complement and coagulation cascades	2/41	85/8146	0.0679087	0.240292	0.18558	715/5265	2
hsa04512	hsa04512	ECM-receptor interaction	2/41	88/8146	0.0721401	0.244067	0.188496	2335/1311	2
hsa04540	hsa04540	Gap junction	2/41	88/8146	0.0721401	0.244067	0.188496	3708/983	2
hsa00603	hsa00603	Glycosphingolipid biosynthesis - globo and isoglobo series	1/41	15/8146	0.0729549	0.244067	0.188496	2717	1
hsa04912	hsa04912	GnRH signaling pathway	2/41	93/8146	0.0793783	0.255678	0.197463	3708/5608	2
hsa04510	hsa04510	Focal adhesion	3/41	201/8146	0.0796669	0.255678	0.197463	2335/1311/3479	3
hsa05169	hsa05169	Epstein-Barr virus infection	3/41	202/8146	0.0805941	0.255678	0.197463	5608/3122/3569	3
hsa05150	hsa05150	Staphylococcus aureus infection	2/41	96/8146	0.0838273	0.261427	0.201903	715/3122	2
hsa04713	hsa04713	Circadian entrainment	2/41	97/8146	0.0853272	0.26167	0.202091	3708/6262	2
hsa01522	hsa01522	Endocrine resistance	2/41	98/8146	0.0868354	0.26193	0.202291	2099/3479	2
hsa04640	hsa04640	Hematopoietic cell lineage	2/41	99/8146	0.0883518	0.262205	0.202504	3122/3569	2
hsa05170	hsa05170	Human immunodeficiency virus 1 infection	3/41	212/8146	0.0901259	0.263117	0.203208	3708/983/5608	3
hsa04914	hsa04914	Progesterone-mediated oocyte maturation	2/41	102/8146	0.0929488	0.263117	0.203208	983/3479	2
hsa04972	hsa04972	Pancreatic secretion	2/41	102/8146	0.0929488	0.263117	0.203208	3708/6262	2
hsa04064	hsa04064	NF-kappa B signaling pathway	2/41	104/8146	0.0960522	0.263785	0.203724	7412/3576	2
hsa04625	hsa04625	C-type lectin receptor signaling pathway	2/41	104/8146	0.0960522	0.263785	0.203724	3708/3569	2
hsa04151	hsa04151	PI3K-Akt signaling pathway	4/41	354/8146	0.100935	0.272928	0.210785	2335/1311/3479/3569	4
hsa04659	hsa04659	Th17 cell differentiation	2/41	108/8146	0.102348	0.272928	0.210785	3122/3569	2
hsa00900	hsa00900	Terpenoid backbone biosynthesis	1/41	22/8146	0.105198	0.27652	0.213559	3156	1
hsa05145	hsa05145	Toxoplasmosis	2/41	112/8146	0.108756	0.281848	0.217674	5608/3122	2
hsa04977	hsa04977	Vitamin digestion and absorption	1/41	24/8146	0.114207	0.291863	0.225409	335	1
hsa04020	hsa04020	Calcium signaling pathway	3/41	240/8146	0.119169	0.300371	0.23198	3708/6262/5350	3
hsa04152	hsa04152	AMPK signaling pathway	2/41	120/8146	0.121885	0.303066	0.234061	3156/3479	2
hsa04919	hsa04919	Thyroid hormone signaling pathway	2/41	121/8146	0.123554	0.303118	0.234102	2099/5350	2
hsa04068	hsa04068	FoxO signaling pathway	2/41	131/8146	0.140536	0.3305	0.255249	3479/3569	2
hsa01523	hsa01523	Antifolate resistance	1/41	30/8146	0.140708	0.3305	0.255249	3569	1
hsa00052	hsa00052	Galactose metabolism	1/41	31/8146	0.145049	0.3305	0.255249	2717	1
hsa05310	hsa05310	Asthma	1/41	31/8146	0.145049	0.3305	0.255249	3122	1
hsa04210	hsa04210	Apoptosis	2/41	136/8146	0.149214	0.3305	0.255249	3708/4217	2
hsa05322	hsa05322	Systemic lupus erythematosus	2/41	136/8146	0.149214	0.3305	0.255249	715/3122	2
hsa04215	hsa04215	Apoptosis - multiple species	1/41	32/8146	0.149368	0.3305	0.255249	666	1
hsa04915	hsa04915	Estrogen signaling pathway	2/41	138/8146	0.152716	0.3305	0.255249	3708/2099	2
hsa04130	hsa04130	SNARE interactions in vesicular transport	1/41	33/8146	0.153667	0.3305	0.255249	53407	1
hsa04371	hsa04371	Apelin signaling pathway	2/41	139/8146	0.154473	0.3305	0.255249	3708/6262	2
hsa05162	hsa05162	Measles	2/41	139/8146	0.154473	0.3305	0.255249	4599/3569	2
hsa05020	hsa05020	Prion disease	3/41	273/8146	0.157264	0.332605	0.256875	3708/6262/3569	3
hsa05224	hsa05224	Breast cancer	2/41	147/8146	0.168673	0.35268	0.272379	2099/3479	2
hsa04514	hsa04514	Cell adhesion molecules	2/41	149/8146	0.172259	0.353527	0.273033	7412/3122	2
hsa04261	hsa04261	Adrenergic signaling in cardiomyocytes	2/41	150/8146	0.174058	0.353527	0.273033	6262/5350	2
hsa05330	hsa05330	Allograft rejection	1/41	38/8146	0.174842	0.353527	0.273033	3122	1
hsa04921	hsa04921	Oxytocin signaling pathway	2/41	154/8146	0.181282	0.358988	0.277251	3708/6262	2
hsa04010	hsa04010	MAPK signaling pathway	3/41	294/8146	0.18329	0.358988	0.277251	5608/4217/3479	3
hsa04060	hsa04060	Cytokine-cytokine receptor interaction	3/41	295/8146	0.184559	0.358988	0.277251	6347/3569/3576	3
hsa05160	hsa05160	Hepatitis C	2/41	157/8146	0.186731	0.358988	0.277251	91543/4599	2
hsa05219	hsa05219	Bladder cancer	1/41	41/8146	0.187298	0.358988	0.277251	3576	1
hsa04940	hsa04940	Type I diabetes mellitus	1/41	43/8146	0.1955	0.367061	0.283486	3122	1
hsa04975	hsa04975	Fat digestion and absorption	1/41	43/8146	0.1955	0.367061	0.283486	335	1
hsa04022	hsa04022	cGMP-PKG signaling pathway	2/41	167/8146	0.205062	0.381125	0.294347	3708/5350	2
hsa04913	hsa04913	Ovarian steroidogenesis	1/41	51/8146	0.227508	0.412359	0.31847	3479	1
hsa05152	hsa05152	Tuberculosis	2/41	180/8146	0.229188	0.412359	0.31847	3122/3569	2
hsa05165	hsa05165	Human papillomavirus infection	3/41	331/8146	0.231688	0.412359	0.31847	2335/4599/1311	3
hsa00600	hsa00600	Sphingolipid metabolism	1/41	53/8146	0.235314	0.412359	0.31847	2717	1
hsa04961	hsa04961	Endocrine and other factor-regulated calcium reabsorption	1/41	53/8146	0.235314	0.412359	0.31847	2099	1
hsa05320	hsa05320	Autoimmune thyroid disease	1/41	53/8146	0.235314	0.412359	0.31847	3122	1
hsa04062	hsa04062	Chemokine signaling pathway	2/41	192/8146	0.251649	0.432367	0.333922	6347/3576	2
hsa05130	hsa05130	Pathogenic Escherichia coli infection	2/41	197/8146	0.261037	0.432367	0.333922	3569/3576	2
hsa04978	hsa04978	Mineral absorption	1/41	60/8146	0.262033	0.432367	0.333922	3162	1
hsa00140	hsa00140	Steroid hormone biosynthesis	1/41	61/8146	0.265775	0.432367	0.333922	3290	1
hsa00561	hsa00561	Glycerolipid metabolism	1/41	61/8146	0.265775	0.432367	0.333922	2717	1
hsa00590	hsa00590	Arachidonic acid metabolism	1/41	61/8146	0.265775	0.432367	0.333922	5740	1
hsa04213	hsa04213	Longevity regulating pathway - multiple species	1/41	62/8146	0.269498	0.432367	0.333922	3479	1
hsa05415	hsa05415	Diabetic cardiomyopathy	2/41	203/8146	0.272313	0.432367	0.333922	6262/5350	2
hsa03250	hsa03250	Viral life cycle - HIV-1	1/41	63/8146	0.273203	0.432367	0.333922	4599	1
hsa04623	hsa04623	Cytosolic DNA-sensing pathway	1/41	63/8146	0.273203	0.432367	0.333922	3569	1
hsa05014	hsa05014	Amyotrophic lateral sclerosis	3/41	364/8146	0.276738	0.432367	0.333922	5608/7494/4217	3
hsa04929	hsa04929	GnRH secretion	1/41	64/8146	0.276889	0.432367	0.333922	3708	1
hsa04927	hsa04927	Cortisol synthesis and secretion	1/41	65/8146	0.280558	0.432367	0.333922	3708	1
hsa04015	hsa04015	Rap1 signaling pathway	2/41	210/8146	0.285469	0.432367	0.333922	5608/3479	2
hsa04720	hsa04720	Long-term potentiation	1/41	67/8146	0.28784	0.432367	0.333922	3708	1
hsa04664	hsa04664	Fc epsilon RI signaling pathway	1/41	68/8146	0.291454	0.432367	0.333922	5608	1
hsa04924	hsa04924	Renin secretion	1/41	69/8146	0.29505	0.432367	0.333922	3708	1
hsa05204	hsa05204	Chemical carcinogenesis - DNA adducts	1/41	69/8146	0.29505	0.432367	0.333922	3290	1
hsa04622	hsa04622	RIG-I-like receptor signaling pathway	1/41	70/8146	0.298629	0.432367	0.333922	3576	1
hsa04917	hsa04917	Prolactin signaling pathway	1/41	70/8146	0.298629	0.432367	0.333922	2099	1
hsa05120	hsa05120	Epithelial cell signaling in Helicobacter pylori infection	1/41	70/8146	0.298629	0.432367	0.333922	3576	1
hsa05218	hsa05218	Melanoma	1/41	72/8146	0.305733	0.432367	0.333922	3479	1
hsa04024	hsa04024	cAMP signaling pathway	2/41	221/8146	0.306108	0.432367	0.333922	6262/5350	2
hsa05166	hsa05166	Human T-cell leukemia virus 1 infection	2/41	222/8146	0.307981	0.432367	0.333922	3122/3569	2
hsa01524	hsa01524	Platinum drug resistance	1/41	73/8146	0.309258	0.432367	0.333922	4217	1
hsa05208	hsa05208	Chemical carcinogenesis - reactive oxygen species	2/41	223/8146	0.309853	0.432367	0.333922	3162/4217	2
hsa03320	hsa03320	PPAR signaling pathway	1/41	75/8146	0.316257	0.432367	0.333922	335	1
hsa04918	hsa04918	Thyroid hormone synthesis	1/41	75/8146	0.316257	0.432367	0.333922	3708	1
hsa05214	hsa05214	Glioma	1/41	75/8146	0.316257	0.432367	0.333922	3479	1
hsa04971	hsa04971	Gastric acid secretion	1/41	76/8146	0.31973	0.432367	0.333922	3708	1
hsa05100	hsa05100	Bacterial invasion of epithelial cells	1/41	77/8146	0.323186	0.432367	0.333922	2335	1
hsa05140	hsa05140	Leishmaniasis	1/41	77/8146	0.323186	0.432367	0.333922	3122	1
hsa00980	hsa00980	Metabolism of xenobiotics by cytochrome P450	1/41	78/8146	0.326625	0.432367	0.333922	3290	1
hsa04612	hsa04612	Antigen processing and presentation	1/41	78/8146	0.326625	0.432367	0.333922	3122	1
hsa04911	hsa04911	Insulin secretion	1/41	86/8146	0.35353	0.461075	0.356093	6262	1
hsa05131	hsa05131	Shigellosis	2/41	247/8146	0.354447	0.461075	0.356093	3708/3576	2
hsa04260	hsa04260	Cardiac muscle contraction	1/41	87/8146	0.356819	0.461075	0.356093	6262	1
hsa04211	hsa04211	Longevity regulating pathway	1/41	89/8146	0.363347	0.461075	0.356093	3479	1
hsa04976	hsa04976	Bile secretion	1/41	89/8146	0.363347	0.461075	0.356093	3156	1
hsa05235	hsa05235	PD-L1 expression and PD-1 checkpoint pathway in cancer	1/41	89/8146	0.363347	0.461075	0.356093	5608	1
hsa04658	hsa04658	Th1 and Th2 cell differentiation	1/41	92/8146	0.373018	0.463752	0.358161	3122	1
hsa04970	hsa04970	Salivary secretion	1/41	92/8146	0.373018	0.463752	0.358161	3708	1
hsa05222	hsa05222	Small cell lung cancer	1/41	92/8146	0.373018	0.463752	0.358161	2335	1
hsa04070	hsa04070	Phosphatidylinositol signaling system	1/41	97/8146	0.388819	0.476951	0.368355	3708	1
hsa05215	hsa05215	Prostate cancer	1/41	97/8146	0.388819	0.476951	0.368355	3479	1
hsa04925	hsa04925	Aldosterone synthesis and secretion	1/41	98/8146	0.391932	0.477586	0.368845	3708	1
hsa04974	hsa04974	Protein digestion and absorption	1/41	103/8146	0.407268	0.493008	0.380756	1294	1
hsa04928	hsa04928	Parathyroid hormone synthesis, secretion and action	1/41	106/8146	0.416287	0.500633	0.386645	3708	1
hsa04922	hsa04922	Glucagon signaling pathway	1/41	107/8146	0.419264	0.500939	0.386881	3708	1
hsa04931	hsa04931	Insulin resistance	1/41	108/8146	0.422226	0.501223	0.3871	3569	1
hsa04725	hsa04725	Cholinergic synapse	1/41	113/8146	0.436815	0.512044	0.395457	3708	1
hsa04670	hsa04670	Leukocyte transendothelial migration	1/41	114/8146	0.43969	0.512044	0.395457	7412	1
hsa04724	hsa04724	Glutamatergic synapse	1/41	114/8146	0.43969	0.512044	0.395457	3708	1
hsa04726	hsa04726	Serotonergic synapse	1/41	115/8146	0.44255	0.512133	0.395526	3708	1
hsa04071	hsa04071	Sphingolipid signaling pathway	1/41	119/8146	0.453849	0.518538	0.400473	4217	1
hsa04722	hsa04722	Neurotrophin signaling pathway	1/41	119/8146	0.453849	0.518538	0.400473	4217	1
hsa05168	hsa05168	Herpes simplex virus 1 infection	3/41	495/8146	0.458213	0.518538	0.400473	6347/3122/3569	3
hsa05016	hsa05016	Huntington disease	2/41	306/8146	0.459357	0.518538	0.400473	3708/4217	2
hsa04611	hsa04611	Platelet activation	1/41	124/8146	0.467659	0.52469	0.405224	3708	1
hsa04110	hsa04110	Cell cycle	1/41	126/8146	0.473086	0.527563	0.407443	983	1
hsa04380	hsa04380	Osteoclast differentiation	1/41	128/8146	0.47846	0.530342	0.409589	5608	1
hsa04142	hsa04142	Lysosome	1/41	132/8146	0.489048	0.535624	0.413669	2717	1
hsa04728	hsa04728	Dopaminergic synapse	1/41	132/8146	0.489048	0.535624	0.413669	3708	1
hsa04270	hsa04270	Vascular smooth muscle contraction	1/41	134/8146	0.494263	0.538133	0.415606	3708	1
hsa04140	hsa04140	Autophagy - animal	1/41	141/8146	0.51211	0.554284	0.42808	3708	1
hsa04550	hsa04550	Signaling pathways regulating pluripotency of stem cells	1/41	143/8146	0.517096	0.556407	0.429719	3479	1
hsa04072	hsa04072	Phospholipase D signaling pathway	1/41	148/8146	0.529342	0.563	0.434811	3576	1
hsa04723	hsa04723	Retrograde endocannabinoid signaling	1/41	148/8146	0.529342	0.563	0.434811	3708	1
hsa04934	hsa04934	Cushing syndrome	1/41	155/8146	0.54598	0.576508	0.445244	3708	1
hsa04150	hsa04150	mTOR signaling pathway	1/41	156/8146	0.54831	0.576508	0.445244	3479	1
hsa04630	hsa04630	JAK-STAT signaling pathway	1/41	162/8146	0.562043	0.587591	0.453803	3569	1
hsa05225	hsa05225	Hepatocellular carcinoma	1/41	168/8146	0.57537	0.59702	0.461085	3162	1
hsa04530	hsa04530	Tight junction	1/41	169/8146	0.577552	0.59702	0.461085	4217	1
hsa05203	hsa05203	Viral carcinogenesis	1/41	204/8146	0.647404	0.665488	0.513963	983	1
hsa05207	hsa05207	Chemical carcinogenesis - receptor activation	1/41	212/8146	0.661711	0.676416	0.522404	2099	1
hsa04810	hsa04810	Regulation of actin cytoskeleton	1/41	218/8146	0.672069	0.683208	0.527649	2335	1
hsa04714	hsa04714	Thermogenesis	1/41	232/8146	0.695048	0.702686	0.542692	4217	1
hsa04014	hsa04014	Ras signaling pathway	1/41	235/8146	0.699764	0.703588	0.543389	3479	1
hsa05206	hsa05206	MicroRNAs in cancer	1/41	310/8146	0.797038	0.797038	0.615561	3162	1
