# Supplementary material for: Identification and validation of an endoplasmic-reticulum-stress-related gene signature as an effective diagnostic marker of endometriosis
Source: PeerJ. 2024 Mar 25;12:e17070. doi: 10.7717/peerj.17070 (PMC10977089; doi:10.7717/peerj.17070)
Supplement: Supplemental Information 5 [file peerj-12-17070-s005.xls]

## Sheet: Sheet1
ITEM TO CHECK	IMPORTANCE	CHECKLIST	Lines
EXPERIMENTAL DESIGN
Definition of experimental and control groups	E	ovarian endometriotic tissues (n=7) and normal endometria of disease-free women (n=7)	165-166
Number within each group	E	7	165-166
Assay carried out by core lab or investigator's lab?	D	Investigator's lab
Acknowledgement of authors' contributions	D	All of the procedures for RT-qPCR was conducted by Tao Wang (first author)
SAMPLE
Description	E	See below
Volume/mass of sample processed	D	50 mg/sample	167-168
Microdissection or macrodissection	E	Microdissection	167-168
Processing procedure	E	See below	166-167
If frozen - how and how quickly?	E	Yes,Samples were placed in liquid nitrogen immediately after collection and subsequently transferred to -80℃ for storage (within 1 h) for less than 3 months	166-167
If fixed - with what, how quickly?	E	No	166-167
Sample storage conditions and duration (especially for FFPE samples)	E	In -80℃ for less than 3 months	166-167
NUCLEIC ACID EXTRACTION
Procedure and/or instrumentation	E	See below	171-172
Name of kit and details of any modifications	E	ABScript III RT Master Mix for qPCR with gDNA Remover (RK20429) from ABclonal	171-172
Source of additional reagents used	D	DEPC water from Beyotime
Details of DNase or RNAse treatment	E	All consumables and reagents were RNAase free	171-172
Contamination assessment (DNA or RNA)	E	Reverse transcription-free controls were provided for each RNA sample in RT-PCR experiments. If the PCR product was derived from a sample of RNA that had not been reverse-transcribed (no reverse-transcribed control), the product was the amplification of contaminating DNA.	171-172
Nucleic acid quantification	E	Yes	169-170
Instrument and method	E	NanoDrop2000 spectrophotometer	169-170
Purity (A260/A280)	D	1.8-2.0
Yield	D	0.5-4.5 μg/ul
RNA integrity method/instrument	E	See below
RIN/RQI or Cq of 3' and 5' transcripts	E	RIN≥6	170
Electrophoresis traces	D	Not performed
Inhibition testing (Cq dilutions, spike or other)	E	Not performed
REVERSE TRANSCRIPTION
Complete reaction conditions	E	See below
Amount of RNA and reaction volume	E	1 μg in 20 μl total	170
Priming oligonucleotide (if using GSP) and concentration	E	Not applicable
Reverse transcriptase and concentration	E	4 ul Reverse Transcriptase (RK20429, Abclonal)	171
Temperature and time	E	55℃,15 min;85℃,5 min; 4℃,Hold	171
Manufacturer of reagents and catalogue numbers	D	RK20429, Abclonal (Wuhan, China)
Cqs with and without RT	D*	Not performed
Storage conditions of cDNA	D	Stored at -80℃ in RNAse-free water
qPCR TARGET INFORMATION
If multiplex, efficiency and LOD of each assay.	E	Not applicable
Sequence accession number	E	Not applicable
Location of amplicon	D	See below
Amplicon length	E	150-250 nts	174-176
In silico specificity screen (BLAST, etc)	E	Yes, BLAST and UCSC Browser analysis performed	174-176
Pseudogenes, retropseudogenes or other homologs?	D	None
Sequence alignment	D	Done
Secondary structure analysis of amplicon	D	Not performed
Location of each primer by exon or intron (if applicable)	E	Not applicable
What splice variants are targeted?	E	None
qPCR OLIGONUCLEOTIDES
Primer sequences	E	see Table 2	174-176
RTPrimerDB Identification Number	D	Not applicable
Probe sequences	D**	Not applicable
Location and identity of any modifications	E	None
Manufacturer of oligonucleotides	D	Invitrogen
Purification method	D	Desalted, by manufacturer (Invitrogen)
qPCR PROTOCOL
Complete reaction conditions	E	See below	Done as the manufacturer's protocol
Reaction volume and amount of cDNA/DNA	E	3 μl of cDNA prep in 30 μl total volumne, then 10 μl is loaded into three wells of a 384-well plate
Primer, (probe), Mg++ and dNTP concentrations	E	10 pmoles of each primer into 30 μl total as above
Polymerase identity and concentration	E	As the manufature's protocol
Buffer/kit identity and manufacturer	E	RK21206, ABclonal
Exact chemical constitution of the buffer	D	As the manufature's protocol
Additives (SYBR Green I, DMSO, etc.)	E	15 μl of SYBR-green (RK21206, ABclonal) in 30 μl total as above
Manufacturer of plates/tubes and catalog number	D	MicroAmp Optical 384-Well Reaction Plate with Barcode (4309849, ABI)
Complete thermocycling parameters	E	95 ℃ for 5 s, 65 ℃ for 34 s and the melting cure stage
Reaction setup (manual/robotic)	D	Manual
Manufacturer of qPCR instrument	E	QuantStudio5 instrument	172
qPCR VALIDATION
Evidence of optimisation (from gradients)	D	None
Specificity (gel, sequence, melt, or digest)	E	see lines 173-175	175-177
For SYBR Green I, Cq of the NTC	E	Not performed
Standard curves with slope and y-intercept	E	See below
PCR efficiency calculated from slope	E	Not performed
Confidence interval for PCR efficiency or standard error	D	Standard Error
r2 of standard curve	E	Not performed
Linear dynamic range	E	See below
Cq variation at lower limit	E	Not performed
Confidence intervals throughout range	D	Not performed
Evidence for limit of detection	E	Not performed
If multiplex, efficiency and LOD of each assay.	E	Not performed
DATA ANALYSIS
qPCR analysis program (source, version)	E	R software (version 4.1.1)	194
Cq method determination	E	Not performed
Outlier identification and disposition	E	Not performed
Results of NTCs	E	Not performed
Justification of number and choice of reference genes	E	β-actin as a normalizer	174
Description of normalisation method	E	2−ΔΔCT method	174
Number and concordance of biological replicates	D	7
Number and stage (RT or qPCR) of technical replicates	E	3	173
Repeatability (intra-assay variation)	E	< 1.5%	173-174
Reproducibility (inter-assay variation, %CV)	D	Presented in Figures as Standard Error	195-200
Power analysis	D	Not performed
Statistical methods for result significance	E	t test (two-tailed)	195-200
Software (source, version)	E	R software (version 4.1.1)	195-200
Cq or raw data submission using RDML	D	Not done
Table 1. MIQE checklist for authors, reviewers and editors. All essential information (E) must be submitted with the manuscript. Desirable
information (D) should be submitted if available. If using primers obtained from RTPrimerDB, information on qPCR target, oligonucleotides,
protocols and validation is available from that source.
*: Assessing the absence of DNA using a no RT assay is essential when first extracting RNA. Once the sample has been validated as
RDNA-free, inclusion of a no-RT control is desirable, but no longer essential.
**: Disclosure of the probe sequence is highly desirable and strongly encouraged. However, since not all commercial pre-designed assay
vendors provide this information, it cannot be an essential requirement. Use of such assays is advised against.
