# Supplementary material for: Identification and validation of an endoplasmic-reticulum-stress-related gene signature as an effective diagnostic marker of endometriosis
Source: PeerJ. 2024 Mar 25;12:e17070. doi: 10.7717/peerj.17070 (PMC10977089; doi:10.7717/peerj.17070)
Supplement: Supplemental Information 8 [file peerj-12-17070-s008.xlsx]

## Sheet: Sheet1
Block Type	384-Well Block
Calibration Background is expired	No
Calibration Background performed on	03-18-2022
Calibration Pure Dye ABY is expired	No
Calibration Pure Dye ABY performed on	03-18-2022
Calibration Pure Dye CY5 is expired	No
Calibration Pure Dye CY5 performed on	03-18-2022
Calibration Pure Dye FAM is expired	No
Calibration Pure Dye FAM performed on	03-19-2022
Calibration Pure Dye JUN is expired	No
Calibration Pure Dye JUN performed on	03-18-2022
Calibration Pure Dye MUSTANG PURPLE is expired	No
Calibration Pure Dye MUSTANG PURPLE performed on	03-18-2022
Calibration Pure Dye NED is expired	No
Calibration Pure Dye NED performed on	03-18-2022
Calibration Pure Dye ROX is expired	No
Calibration Pure Dye ROX performed on	03-19-2022
Calibration Pure Dye SYBR is expired	No
Calibration Pure Dye SYBR performed on	03-19-2022
Calibration Pure Dye TAMRA is expired	No
Calibration Pure Dye TAMRA performed on	03-19-2022
Calibration Pure Dye VIC is expired	No
Calibration Pure Dye VIC performed on	03-19-2022
Calibration ROI is expired	No
Calibration ROI performed on	03-18-2022
Calibration Uniformity is expired	No
Calibration Uniformity performed on	03-18-2022
Chemistry	SYBR_GREEN
Date Created	2022-05-30 12:42:48 PM CST
Experiment Barcode
Experiment Comment
Experiment File Name	F:\experiment records\pcr\20220530 VALIDATION.eds
Experiment Name	20220328 VALIDATION
Experiment Run End Time	2022-05-30 12:31:05 PM CST
Experiment Type	Standard Curve
Instrument Name	272530664
Instrument Serial Number	272530664
Instrument Type	QuantStudio™ 5 System
Passive Reference	ROX
Post-read Stage/Step
Pre-read Stage/Step
Quantification Cycle Method	Ct
Signal Smoothing On	true
Stage where Melt Analysis is performed	Stage3
Stage/ Cycle where Ct Analysis is performed	Stage2, Step2
User Name
Well	Well Position	Omit	Sample Name	Target Name	Task	Reporter	Quencher	CT	Ct Mean	Ct SD	Quantity	Quantity Mean	Quantity SD	Y-Intercept	R(superscript 2)	Slope	Efficiency	Automatic Ct Threshold	Ct Threshold	Automatic Baseline	Baseline Start	Baseline End	Amp Status	Comments	Cq Conf	CQCONF	HIGHSD	MTP	PRFDROP	NOISE	OUTLIERRG	Tm1	Tm2	Tm3	Tm4
1	A1	FALSE	N1	ptgis	UNKNOWN	SYBR	None	23.734	23.7199	0.0820703								TRUE	0.52071	TRUE	3	18	Amp		0.974723	N	N	N	N	N	N	85.1829
2	A2	FALSE	N1	ptgis	UNKNOWN	SYBR	None	23.794	23.7199	0.0820703								TRUE	0.52071	TRUE	3	16	Amp		0.962472	N	N	N	N	N	N	85.1829
3	A3	FALSE	N1	ptgis	UNKNOWN	SYBR	None	23.6317	23.7199	0.0820703								TRUE	0.52071	TRUE	3	16	Amp		0.980146	N	N	N	N	N	N	85.2954
4	A4	FALSE	N1	ESR1	UNKNOWN	SYBR	None	18.8398	18.8424	0.156379								TRUE	0.542962	TRUE	3	14	Amp		0.980065	N	N	N	N	N	N	91.1412
5	A5	FALSE	N1	ESR1	UNKNOWN	SYBR	None	19	18.8424	0.156379								TRUE	0.542962	TRUE	3	14	Amp		0.962678	N	N	N	N	N	N	91.3185
6	A6	FALSE	N1	ESR1	UNKNOWN	SYBR	None	18.6873	18.8424	0.156379								TRUE	0.542962	TRUE	3	13	Amp		0.987483	N	N	N	N	N	N	91.0939
7	A7	FALSE	N1	RYR2	UNKNOWN	SYBR	None	27.4592	27.4614	0.0218017								TRUE	0.605221	TRUE	3	18	Amp		0.679197	Y	N	N	N	Y	N	84.8079
8	A8	FALSE	N1	RYR2	UNKNOWN	SYBR	None	27.4842	27.4614	0.0218017								TRUE	0.605221	TRUE	3	21	Amp		0.952618	N	N	N	N	N	N	85.1446
9	A9	FALSE	N1	RYR2	UNKNOWN	SYBR	None	27.4408	27.4614	0.0218017								TRUE	0.605221	TRUE	3	19	Amp		0.984532	N	N	N	N	N	N	84.8893
10	A10	FALSE	N1	AQP11	UNKNOWN	SYBR	None	26.3233	26.4472	0.253657								TRUE	0.456844	TRUE	3	17	Amp		0.957017	N	N	N	N	N	N	80.4049
11	A11	FALSE	N1	AQP11	UNKNOWN	SYBR	None	26.2793	26.4472	0.253657								TRUE	0.456844	TRUE	3	20	Amp		0.907589	N	N	N	N	N	N	80.6291
12	A12	FALSE	N1	AQP11	UNKNOWN	SYBR	None	26.739	26.4472	0.253657								TRUE	0.456844	TRUE	3	18	Amp		0.731779	Y	N	N	N	N	N	80.517
13	A13	FALSE	N1	APOA1	UNKNOWN	SYBR	None	26.8926	26.9954	0.454748								TRUE	0.411991	TRUE	3	21	Amp		0.982394	N	N	N	N	N	N	82.8034
14	A14	FALSE	N1	APOA1	UNKNOWN	SYBR	None	27.4927	26.9954	0.454748								TRUE	0.411991	TRUE	3	22	Amp		0.977275	N	N	N	N	N	N	82.9157
15	A15	FALSE	N1	APOA1	UNKNOWN	SYBR	None	26.6008	26.9954	0.454748								TRUE	0.411991	TRUE	3	18	Amp		0.977688	N	N	N	N	N	N	82.9157
16	A16	FALSE	N1	BOK	UNKNOWN	SYBR	None	19.9659	19.3861	0.504949								TRUE	0.0999872	TRUE	3	16	Amp		0.985009	N	Y	N	N	N	N	84.0389
17	A17	FALSE	N1	BOK	UNKNOWN	SYBR	None	19.15	19.3861	0.504949								TRUE	0.0999872	TRUE	3	14	Amp		0.979359	N	Y	N	N	N	N	84.3839
18	A18	FALSE	N1	BOK	UNKNOWN	SYBR	None	19.0425	19.3861	0.504949								TRUE	0.0999872	TRUE	3	15	Amp		0.984218	N	Y	N	N	N	N	84.0468
19	A19	FALSE	N1	HO1	UNKNOWN	SYBR	None	22.6847	23.5076	0.715113								TRUE	0.59364	TRUE	3	14	Amp		0.920348	N	Y	N	N	N	N	88.6537
20	A20	FALSE	N1	HO1	UNKNOWN	SYBR	None	23.9783	23.5076	0.715113								TRUE	0.59364	TRUE	3	18	Amp		0.975944	N	Y	N	N	N	N	88.6537
21	A21	FALSE	N1	HO1	UNKNOWN	SYBR	None	23.8598	23.5076	0.715113								TRUE	0.59364	TRUE	3	15	Amp		0.98653	N	Y	N	N	N	N	88.6603
22	A22	FALSE	N1	RSAD2	UNKNOWN	SYBR	None	27.2142	27.2656	0.128643								TRUE	0.467927	TRUE	3	20	Amp		0.970749	N	N	N	N	N	N	83.4902
23	A23	FALSE	N1	RSAD2	UNKNOWN	SYBR	None	27.1707	27.2656	0.128643								TRUE	0.467927	TRUE	3	21	Amp		0.980536	N	N	N	N	N	N	83.6026
24	A24	FALSE	N1	RSAD2	UNKNOWN	SYBR	None	27.412	27.2656	0.128643								TRUE	0.467927	TRUE	3	22	Amp		0.955416	N	N	N	N	N	N	83.4902
25	B1	FALSE	N2	ptgis	UNKNOWN	SYBR	None	24.5896	24.582	0.0176785								TRUE	0.52071	TRUE	3	17	Amp		0.983397	N	N	N	N	N	N	85.1829
26	B2	FALSE	N2	ptgis	UNKNOWN	SYBR	None	24.5619	24.582	0.0176785								TRUE	0.52071	TRUE	3	18	Amp		0.98584	N	N	N	N	N	N	85.2954
27	B3	FALSE	N2	ptgis	UNKNOWN	SYBR	None	24.5947	24.582	0.0176785								TRUE	0.52071	TRUE	3	18	Amp		0.965381	N	N	N	N	N	N	85.2954
28	B4	FALSE	N2	ESR1	UNKNOWN	SYBR	None	19.656	19.6077	0.0447019								TRUE	0.542962	TRUE	3	12	Amp		0.981363	N	N	N	N	N	N	91.1412
29	B5	FALSE	N2	ESR1	UNKNOWN	SYBR	None	19.5678	19.6077	0.0447019								TRUE	0.542962	TRUE	3	14	Amp		0.97167	N	N	N	N	N	N	91.0939
30	B6	FALSE	N2	ESR1	UNKNOWN	SYBR	None	19.5994	19.6077	0.0447019								TRUE	0.542962	TRUE	3	12	Amp		0.980823	N	N	N	N	N	N	91.0939
31	B7	FALSE	N2	RYR2	UNKNOWN	SYBR	None	27.6773	27.4435	0.250331								TRUE	0.605221	TRUE	3	22	Amp		0.969218	N	N	N	N	N	N	85.0324
32	B8	FALSE	N2	RYR2	UNKNOWN	SYBR	None	27.1794	27.4435	0.250331								TRUE	0.605221	TRUE	3	21	Amp		0.936823	N	N	Y	N	N	N	85.0324	76.5013
33	B9	FALSE	N2	RYR2	UNKNOWN	SYBR	None	27.4738	27.4435	0.250331								TRUE	0.605221	TRUE	3	21	Amp		0.975434	N	N	N	N	N	N	85.0014
34	B10	FALSE	N2	AQP11	UNKNOWN	SYBR	None	26.8467	27.1241	0.31267								TRUE	0.456844	TRUE	3	21	Amp		0.904625	N	N	N	N	N	N	80.2928
35	B11	FALSE	N2	AQP11	UNKNOWN	SYBR	None	27.4629	27.1241	0.31267								TRUE	0.456844	TRUE	3	21	Amp		0.744191	Y	N	N	N	N	N	80.2928
36	B12	FALSE	N2	AQP11	UNKNOWN	SYBR	None	27.0629	27.1241	0.31267								TRUE	0.456844	TRUE	3	21	Amp		0.873806	N	N	N	N	N	N	80.2928
37	B13	FALSE	N2	APOA1	UNKNOWN	SYBR	None	28.5198	28.4023	0.149773								TRUE	0.411991	TRUE	3	22	Amp		0.97073	N	N	N	N	N	N	82.8034
38	B14	FALSE	N2	APOA1	UNKNOWN	SYBR	None	28.4535	28.4023	0.149773								TRUE	0.411991	TRUE	3	21	Amp		0.986282	N	N	N	N	N	N	82.9157
39	B15	FALSE	N2	APOA1	UNKNOWN	SYBR	None	28.2337	28.4023	0.149773								TRUE	0.411991	TRUE	3	21	Amp		0.978345	N	N	N	N	N	N	82.8034
40	B16	FALSE	N2	BOK	UNKNOWN	SYBR	None	19.2785	19.5595	0.311258								TRUE	0.0999872	TRUE	3	16	Amp		0.989169	N	N	N	N	N	N	84.2636
41	B17	FALSE	N2	BOK	UNKNOWN	SYBR	None	19.8941	19.5595	0.311258								TRUE	0.0999872	TRUE	3	17	Amp		0.940072	N	N	N	N	N	N	84.2715
42	B18	FALSE	N2	BOK	UNKNOWN	SYBR	None	19.5058	19.5595	0.311258								TRUE	0.0999872	TRUE	3	15	Amp		0.98905	N	N	N	N	N	N	84.1592
43	B19	FALSE	N2	HO1	UNKNOWN	SYBR	None	23.3584	23.389	0.060485								TRUE	0.59364	TRUE	3	17	Amp		0.94924	N	N	N	N	N	N	88.6537
44	B20	FALSE	N2	HO1	UNKNOWN	SYBR	None	23.35	23.389	0.060485								TRUE	0.59364	TRUE	3	15	Amp		0.954555	N	N	N	N	N	N	88.6537
45	B21	FALSE	N2	HO1	UNKNOWN	SYBR	None	23.4587	23.389	0.060485								TRUE	0.59364	TRUE	3	16	Amp		0.968496	N	N	N	N	N	N	88.6603
46	B22	FALSE	N2	RSAD2	UNKNOWN	SYBR	None	28.0453	28.1582	0.131407								TRUE	0.467927	TRUE	3	23	Amp		0.977366	N	N	N	N	N	N	83.4902
47	B23	FALSE	N2	RSAD2	UNKNOWN	SYBR	None	28.3024	28.1582	0.131407								TRUE	0.467927	TRUE	3	23	Amp		0.973196	N	N	N	N	N	N	83.4902
48	B24	FALSE	N2	RSAD2	UNKNOWN	SYBR	None	28.1268	28.1582	0.131407								TRUE	0.467927	TRUE	3	22	Amp		0.963895	N	N	N	N	N	N	83.4902
49	C1	FALSE	N3	ptgis	UNKNOWN	SYBR	None	29.1007	29.5661	0.404044								TRUE	0.52071	TRUE	3	23	Amp		0.981261	N	N	N	N	N	N	85.1829
50	C2	FALSE	N3	ptgis	UNKNOWN	SYBR	None	29.7695	29.5661	0.404044								TRUE	0.52071	TRUE	3	23	Amp		0.982046	N	N	N	N	N	N	85.1829
51	C3	FALSE	N3	ptgis	UNKNOWN	SYBR	None	29.828	29.5661	0.404044								TRUE	0.52071	TRUE	3	24	Amp		0.969859	N	N	N	N	N	N	85.1829
52	C4	FALSE	N3	ESR1	UNKNOWN	SYBR	None	23.4825	23.4865	0.00355285								TRUE	0.542962	TRUE	3	17	Amp		0.983371	N	N	N	N	N	N	91.1412
53	C5	FALSE	N3	ESR1	UNKNOWN	SYBR	None	23.489	23.4865	0.00355285								TRUE	0.542962	TRUE	3	16	Amp		0.975319	N	N	N	N	N	N	91.0939
54	C6	FALSE	N3	ESR1	UNKNOWN	SYBR	None	23.488	23.4865	0.00355285								TRUE	0.542962	TRUE	3	18	Amp		0.969116	N	N	N	N	N	N	91.0939
55	C7	FALSE	N3	RYR2	UNKNOWN	SYBR	None	29.5696	29.7814	0.223774								TRUE	0.605221	TRUE	3	24	Amp		0.970856	N	N	Y	N	N	N	84.9201	77.9605
56	C8	FALSE	N3	RYR2	UNKNOWN	SYBR	None	29.759	29.7814	0.223774								TRUE	0.605221	TRUE	3	24	Amp		0.929308	N	N	N	N	N	N	85.0324
57	C9	FALSE	N3	RYR2	UNKNOWN	SYBR	None	30.0155	29.7814	0.223774								TRUE	0.605221	TRUE	3	24	Amp		0.78133	Y	N	N	N	N	N	85.0014
58	C10	FALSE	N3	AQP11	UNKNOWN	SYBR	None	32.0021	31.8538	0.290366								TRUE	0.456844	TRUE	3	25	Amp		0.884013	N	N	N	N	N	N	80.6291
59	C11	FALSE	N3	AQP11	UNKNOWN	SYBR	None	31.5192	31.8538	0.290366								TRUE	0.456844	TRUE	3	25	Amp		0.879106	N	N	N	N	N	N	89.2617
60	C12	FALSE	N3	AQP11	UNKNOWN	SYBR	None	32.0401	31.8538	0.290366								TRUE	0.456844	TRUE	3	26	Amp		0.860862	N	N	N	N	N	N	80.2928
61	C13	FALSE	N3	APOA1	UNKNOWN	SYBR	None	31.4184	31.15	0.598245								TRUE	0.411991	TRUE	3	25	Amp		0.986924	N	Y	N	N	N	N	94.9346
62	C14	FALSE	N3	APOA1	UNKNOWN	SYBR	None	30.4646	31.15	0.598245								TRUE	0.411991	TRUE	3	24	Amp		0.981388	N	Y	N	N	N	N	82.691
63	C15	FALSE	N3	APOA1	UNKNOWN	SYBR	None	31.5671	31.15	0.598245								TRUE	0.411991	TRUE	3	24	Amp		0.985696	N	Y	N	N	N	N	86.9594
64	C16	FALSE	N3	BOK	UNKNOWN	SYBR	None	21.9861	22.2119	0.207865								TRUE	0.0999872	TRUE	3	18	Amp		0.987709	N	N	N	N	N	N	89.4306
65	C17	FALSE	N3	BOK	UNKNOWN	SYBR	None	22.3952	22.2119	0.207865								TRUE	0.0999872	TRUE	3	17	Amp		0.989467	N	N	N	N	N	N	88.9908
66	C18	FALSE	N3	BOK	UNKNOWN	SYBR	None	22.2544	22.2119	0.207865								TRUE	0.0999872	TRUE	3	18	Amp		0.986309	N	N	N	N	N	N	84.2715
67	C19	FALSE	N3	HO1	UNKNOWN	SYBR	None	31.9139	31.2596	0.570147								TRUE	0.59364	TRUE	3	25	Amp		0.943606	N	Y	N	N	N	N	88.5414
68	C20	FALSE	N3	HO1	UNKNOWN	SYBR	None	30.8691	31.2596	0.570147								TRUE	0.59364	TRUE	3	24	Amp		0.987374	N	Y	N	N	N	N	88.6537
69	C21	FALSE	N3	HO1	UNKNOWN	SYBR	None	30.9958	31.2596	0.570147								TRUE	0.59364	TRUE	3	25	Amp		0.960881	N	Y	N	N	N	N	88.6603
70	C22	FALSE	N3	RSAD2	UNKNOWN	SYBR	None	29.7382	30.3051	0.577626								TRUE	0.467927	TRUE	3	24	Amp		0.973786	N	Y	N	N	N	N	83.4902
71	C23	FALSE	N3	RSAD2	UNKNOWN	SYBR	None	30.2841	30.3051	0.577626								TRUE	0.467927	TRUE	3	23	Amp		0.978249	N	Y	N	N	N	N	83.4902
72	C24	FALSE	N3	RSAD2	UNKNOWN	SYBR	None	30.8929	30.3051	0.577626								TRUE	0.467927	TRUE	3	25	Amp		0.954432	N	Y	N	N	N	N	83.4902
73	D1	FALSE	N4	ptgis	UNKNOWN	SYBR	None	24.9213	24.8765	0.0656205								TRUE	0.52071	TRUE	3	17	Amp		0.976578	N	N	N	N	N	N	85.1829
74	D2	FALSE	N4	ptgis	UNKNOWN	SYBR	None	24.8012	24.8765	0.0656205								TRUE	0.52071	TRUE	3	19	Amp		0.975815	N	N	N	N	N	N	85.1829
75	D3	FALSE	N4	ptgis	UNKNOWN	SYBR	None	24.9072	24.8765	0.0656205								TRUE	0.52071	TRUE	3	18	Amp		0.978664	N	N	N	N	N	N	85.1829
76	D4	FALSE	N4	ESR1	UNKNOWN	SYBR	None	19.0017	19.0004	0.0226835								TRUE	0.542962	TRUE	3	14	Amp		0.952451	N	N	N	N	N	N	91.1412
77	D5	FALSE	N4	ESR1	UNKNOWN	SYBR	None	18.9771	19.0004	0.0226835								TRUE	0.542962	TRUE	3	13	Amp		0.954803	N	N	N	N	N	N	91.0939
78	D6	FALSE	N4	ESR1	UNKNOWN	SYBR	None	19.0224	19.0004	0.0226835								TRUE	0.542962	TRUE	3	11	Amp		0.94006	N	N	N	N	N	N	91.2062
79	D7	FALSE	N4	RYR2	UNKNOWN	SYBR	None	27.5471	27.93	0.341955								TRUE	0.605221	TRUE	3	20	Amp		0.974816	N	N	N	N	N	N	90.3082
80	D8	FALSE	N4	RYR2	UNKNOWN	SYBR	None	28.0378	27.93	0.341955								TRUE	0.605221	TRUE	3	22	Amp		0.833748	N	N	N	N	N	N	84.9201
81	D9	FALSE	N4	RYR2	UNKNOWN	SYBR	None	28.2051	27.93	0.341955								TRUE	0.605221	TRUE	3	21	Amp		0.944649	N	N	N	N	N	N	85.0014
82	D10	FALSE	N4	AQP11	UNKNOWN	SYBR	None	26.3765	26.2513	0.118615								TRUE	0.456844	TRUE	3	21	Amp		0.853163	N	N	N	N	N	N	80.1807
83	D11	FALSE	N4	AQP11	UNKNOWN	SYBR	None	26.2369	26.2513	0.118615								TRUE	0.456844	TRUE	3	21	Amp		0.849184	N	N	N	N	N	N	80.1807
84	D12	FALSE	N4	AQP11	UNKNOWN	SYBR	None	26.1406	26.2513	0.118615								TRUE	0.456844	TRUE	3	21	Amp		0.897427	N	N	N	N	N	N	80.1807
85	D13	FALSE	N4	APOA1	UNKNOWN	SYBR	None	27.5384	27.59	0.0965552								TRUE	0.411991	TRUE	3	22	Amp		0.906293	N	N	N	N	N	N	82.691
86	D14	FALSE	N4	APOA1	UNKNOWN	SYBR	None	27.7014	27.59	0.0965552								TRUE	0.411991	TRUE	3	22	Amp		0.924292	N	N	N	N	N	N	82.8034
87	D15	FALSE	N4	APOA1	UNKNOWN	SYBR	None	27.5301	27.59	0.0965552								TRUE	0.411991	TRUE	3	21	Amp		0.922818	N	N	N	N	N	N	82.8034
88	D16	FALSE	N4	BOK	UNKNOWN	SYBR	None	19.3154	19.5433	0.204658								TRUE	0.0999872	TRUE	3	16	Amp		0.992832	N	N	N	N	N	N	91.2278
89	D17	FALSE	N4	BOK	UNKNOWN	SYBR	None	19.6029	19.5433	0.204658								TRUE	0.0999872	TRUE	3	16	Amp		0.978379	N	N	N	N	N	N	84.4963
90	D18	FALSE	N4	BOK	UNKNOWN	SYBR	None	19.7115	19.5433	0.204658								TRUE	0.0999872	TRUE	3	15	Amp		0.957649	N	N	N	N	N	N	84.0468
91	D19	FALSE	N4	HO1	UNKNOWN	SYBR	None	24.2194	24.1571	0.0942413								TRUE	0.59364	TRUE	3	18	Amp		0.964927	N	N	N	N	N	N	88.5414
92	D20	FALSE	N4	HO1	UNKNOWN	SYBR	None	24.2033	24.1571	0.0942413								TRUE	0.59364	TRUE	3	19	Amp		0.945253	N	N	N	N	N	N	88.6537
93	D21	FALSE	N4	HO1	UNKNOWN	SYBR	None	24.0487	24.1571	0.0942413								TRUE	0.59364	TRUE	3	16	Amp		0.960888	N	N	N	N	N	N	88.6603
94	D22	FALSE	N4	RSAD2	UNKNOWN	SYBR	None	27.3441	27.4214	0.0706178								TRUE	0.467927	TRUE	3	21	Amp		0.970932	N	N	N	N	N	N	83.4902
95	D23	FALSE	N4	RSAD2	UNKNOWN	SYBR	None	27.4825	27.4214	0.0706178								TRUE	0.467927	TRUE	3	22	Amp		0.97702	N	N	N	N	N	N	83.4902
96	D24	FALSE	N4	RSAD2	UNKNOWN	SYBR	None	27.4376	27.4214	0.0706178								TRUE	0.467927	TRUE	3	21	Amp		0.974025	N	N	N	N	N	N	83.4902
97	E1	FALSE	N5	ptgis	UNKNOWN	SYBR	None	26.6515	26.6944	0.0372624								TRUE	0.52071	TRUE	3	19	Amp		0.980597	N	N	N	N	N	N	85.0705
98	E2	FALSE	N5	ptgis	UNKNOWN	SYBR	None	26.718	26.6944	0.0372624								TRUE	0.52071	TRUE	3	21	Amp		0.966893	N	N	N	N	N	N	85.1829
99	E3	FALSE	N5	ptgis	UNKNOWN	SYBR	None	26.7138	26.6944	0.0372624								TRUE	0.52071	TRUE	3	19	Amp		0.97805	N	N	N	N	N	N	85.1829
100	E4	FALSE	N5	ESR1	UNKNOWN	SYBR	None	19.1501	19.2193	0.0844769								TRUE	0.542962	TRUE	3	12	Amp		0.973265	N	N	N	N	N	N	91.2536
101	E5	FALSE	N5	ESR1	UNKNOWN	SYBR	None	19.1945	19.2193	0.0844769								TRUE	0.542962	TRUE	3	13	Amp		0.948349	N	N	N	N	N	N	91.0939
102	E6	FALSE	N5	ESR1	UNKNOWN	SYBR	None	19.3134	19.2193	0.0844769								TRUE	0.542962	TRUE	3	14	Amp		0.947762	N	N	N	N	N	N	91.2062
103	E7	FALSE	N5	RYR2	UNKNOWN	SYBR	None	26.7724	26.6873	0.0894898								TRUE	0.605221	TRUE	3	19	Amp		0.969022	N	N	N	N	N	N	85.0324
104	E8	FALSE	N5	RYR2	UNKNOWN	SYBR	None	26.594	26.6873	0.0894898								TRUE	0.605221	TRUE	3	19	Amp		0.983733	N	N	N	N	N	N	94.9105
105	E9	FALSE	N5	RYR2	UNKNOWN	SYBR	None	26.6956	26.6873	0.0894898								TRUE	0.605221	TRUE	3	20	Amp		0.982831	N	N	N	N	N	N	91.8402
106	E10	FALSE	N5	AQP11	UNKNOWN	SYBR	None	26.1758	26.2342	0.0512224								TRUE	0.456844	TRUE	3	20	Amp		0.908392	N	N	N	N	N	N	80.1807
107	E11	FALSE	N5	AQP11	UNKNOWN	SYBR	None	26.255	26.2342	0.0512224								TRUE	0.456844	TRUE	3	20	Amp		0.85562	N	N	N	N	N	N	80.1807
108	E12	FALSE	N5	AQP11	UNKNOWN	SYBR	None	26.2717	26.2342	0.0512224								TRUE	0.456844	TRUE	3	20	Amp		0.916148	N	N	N	N	N	N	80.1807
109	E13	FALSE	N5	APOA1	UNKNOWN	SYBR	None	28.2066	28.1994	0.404949								TRUE	0.411991	TRUE	3	22	Amp		0.986542	N	N	N	N	N	N	83.365
110	E14	FALSE	N5	APOA1	UNKNOWN	SYBR	None	28.6008	28.1994	0.404949								TRUE	0.411991	TRUE	3	24	Amp		0.592609	Y	N	Y	N	N	N	82.691	65.8421
111	E15	FALSE	N5	APOA1	UNKNOWN	SYBR	None	27.791	28.1994	0.404949								TRUE	0.411991	TRUE	3	21	Amp		0.984243	N	N	N	N	N	N	82.4664
112	E16	FALSE	N5	BOK	UNKNOWN	SYBR	None	19.8664	19.663	0.244893								TRUE	0.0999872	TRUE	3	14	Amp		0.973276	N	N	N	N	N	N	84.1513
113	E17	FALSE	N5	BOK	UNKNOWN	SYBR	None	19.3912	19.663	0.244893								TRUE	0.0999872	TRUE	3	15	Amp		0.979602	N	N	N	N	N	N	84.2715
114	E18	FALSE	N5	BOK	UNKNOWN	SYBR	None	19.7314	19.663	0.244893								TRUE	0.0999872	TRUE	3	17	Amp		0.991469	N	N	N	N	N	N	89.1032
115	E19	FALSE	N5	HO1	UNKNOWN	SYBR	None	23.8884	23.9588	0.0611426								TRUE	0.59364	TRUE	3	19	Amp		0.98533	N	N	N	N	N	N	88.5414
116	E20	FALSE	N5	HO1	UNKNOWN	SYBR	None	23.9892	23.9588	0.0611426								TRUE	0.59364	TRUE	3	19	Amp		0.910911	N	N	N	N	N	N	88.5414
117	E21	FALSE	N5	HO1	UNKNOWN	SYBR	None	23.9988	23.9588	0.0611426								TRUE	0.59364	TRUE	3	17	Amp		0.942127	N	N	N	N	N	N	88.6603
118	E22	FALSE	N5	RSAD2	UNKNOWN	SYBR	None	27.7345	27.6246	0.112583								TRUE	0.467927	TRUE	3	22	Amp		0.972381	N	N	N	N	N	N	83.4902
119	E23	FALSE	N5	RSAD2	UNKNOWN	SYBR	None	27.6297	27.6246	0.112583								TRUE	0.467927	TRUE	3	21	Amp		0.962733	N	N	N	N	N	N	83.4902
120	E24	FALSE	N5	RSAD2	UNKNOWN	SYBR	None	27.5095	27.6246	0.112583								TRUE	0.467927	TRUE	3	23	Amp		0.985157	N	N	N	N	N	N	83.3778
121	F1	FALSE	N6	ptgis	UNKNOWN	SYBR	None	30.4585	30.162	0.350899								TRUE	0.52071	TRUE	3	24	Amp		0.968598	N	N	N	N	N	N	85.0705
122	F2	FALSE	N6	ptgis	UNKNOWN	SYBR	None	29.7746	30.162	0.350899								TRUE	0.52071	TRUE	3	23	Amp		0.983143	N	N	N	N	N	N	85.0705
123	F3	FALSE	N6	ptgis	UNKNOWN	SYBR	None	30.253	30.162	0.350899								TRUE	0.52071	TRUE	3	23	Amp		0.972913	N	N	N	N	N	N	85.1829
124	F4	FALSE	N6	ESR1	UNKNOWN	SYBR	None	21.8622	21.8364	0.0390249								TRUE	0.542962	TRUE	3	16	Amp		0.95623	N	N	N	N	N	N	91.2536
125	F5	FALSE	N6	ESR1	UNKNOWN	SYBR	None	21.7915	21.8364	0.0390249								TRUE	0.542962	TRUE	3	15	Amp		0.986743	N	N	N	N	N	N	91.2062
126	F6	FALSE	N6	ESR1	UNKNOWN	SYBR	None	21.8555	21.8364	0.0390249								TRUE	0.542962	TRUE	3	16	Amp		0.952278	N	N	N	N	N	N	91.2062
127	F7	FALSE	N6	RYR2	UNKNOWN	SYBR	None	32.5915	32.1878	0.500493								TRUE	0.605221	TRUE	3	27	Amp		0.972536	N	Y	N	N	N	N	94.9105
128	F8	FALSE	N6	RYR2	UNKNOWN	SYBR	None	31.6278	32.1878	0.500493								TRUE	0.605221	TRUE	3	23	Amp		0.986683	N	Y	N	N	N	N	94.5737
129	F9	FALSE	N6	RYR2	UNKNOWN	SYBR	None	32.344	32.1878	0.500493								TRUE	0.605221	TRUE	3	27	Amp		0.851157	N	Y	N	N	N	N	90.1585
130	F10	FALSE	N6	AQP11	UNKNOWN	SYBR	None	30.9706	31.0704	0.15734								TRUE	0.456844	TRUE	3	26	Amp		0.880705	N	N	N	N	N	N	80.1807
131	F11	FALSE	N6	AQP11	UNKNOWN	SYBR	None	31.2517	31.0704	0.15734								TRUE	0.456844	TRUE	3	25	Amp		0.910617	N	N	N	N	N	N	80.1807
132	F12	FALSE	N6	AQP11	UNKNOWN	SYBR	None	30.9887	31.0704	0.15734								TRUE	0.456844	TRUE	3	25	Amp		0.902319	N	N	N	N	N	N	80.0686
133	F13	FALSE	N6	APOA1	UNKNOWN	SYBR	None	28.5556	28.8009	0.289543								TRUE	0.411991	TRUE	3	22	Amp		0.987457	N	N	N	N	N	N	94.9346
134	F14	FALSE	N6	APOA1	UNKNOWN	SYBR	None	29.1203	28.8009	0.289543								TRUE	0.411991	TRUE	3	23	Amp		0.874542	N	N	N	N	N	N	94.9346
135	F15	FALSE	N6	APOA1	UNKNOWN	SYBR	None	28.7267	28.8009	0.289543								TRUE	0.411991	TRUE	3	22	Amp		0.992015	N	N	N	N	N	N	82.4664
136	F16	FALSE	N6	BOK	UNKNOWN	SYBR	None	21.6401	21.6076	0.113709								TRUE	0.0999872	TRUE	3	18	Amp		0.990731	N	N	N	N	N	N	84.2636
137	F17	FALSE	N6	BOK	UNKNOWN	SYBR	None	21.4811	21.6076	0.113709								TRUE	0.0999872	TRUE	3	18	Amp		0.985434	N	N	N	N	N	N	84.0468
138	F18	FALSE	N6	BOK	UNKNOWN	SYBR	None	21.7015	21.6076	0.113709								TRUE	0.0999872	TRUE	3	18	Amp		0.990142	N	N	N	N	N	N	83.7097
139	F19	FALSE	N6	HO1	UNKNOWN	SYBR	None	28.7147	28.5307	0.341301								TRUE	0.59364	TRUE	3	22	Amp		0.92809	N	N	N	N	N	N	88.5414
140	F20	FALSE	N6	HO1	UNKNOWN	SYBR	None	28.7406	28.5307	0.341301								TRUE	0.59364	TRUE	3	21	Amp		0.983716	N	N	N	N	N	N	88.6537
141	F21	FALSE	N6	HO1	UNKNOWN	SYBR	None	28.1369	28.5307	0.341301								TRUE	0.59364	TRUE	3	22	Amp		0.950301	N	N	N	N	N	N	88.5479
142	F22	FALSE	N6	RSAD2	UNKNOWN	SYBR	None	30.0801	29.9906	0.472026								TRUE	0.467927	TRUE	3	22	Amp		0.979315	N	N	N	N	N	N	83.3778
143	F23	FALSE	N6	RSAD2	UNKNOWN	SYBR	None	30.4115	29.9906	0.472026								TRUE	0.467927	TRUE	3	24	Amp		0.977457	N	N	N	N	N	N	83.3778
144	F24	FALSE	N6	RSAD2	UNKNOWN	SYBR	None	29.4803	29.9906	0.472026								TRUE	0.467927	TRUE	3	24	Amp		0.987255	N	N	N	N	N	N	83.3778
145	G1	FALSE	N7	ptgis	UNKNOWN	SYBR	None	28.114	28.1207	0.26154								TRUE	0.52071	TRUE	3	22	Amp		0.961419	N	N	N	N	N	N	85.0705
146	G2	FALSE	N7	ptgis	UNKNOWN	SYBR	None	28.3856	28.1207	0.26154								TRUE	0.52071	TRUE	3	23	Amp		0.971055	N	N	N	N	N	N	85.0705
147	G3	FALSE	N7	ptgis	UNKNOWN	SYBR	None	27.8626	28.1207	0.26154								TRUE	0.52071	TRUE	3	22	Amp		0.961545	N	N	N	N	N	N	85.1829
148	G4	FALSE	N7	ESR1	UNKNOWN	SYBR	None	20.9056	20.8708	0.031098								TRUE	0.542962	TRUE	3	14	Amp		0.972254	N	N	N	N	N	N	91.2536
149	G5	FALSE	N7	ESR1	UNKNOWN	SYBR	None	20.8609	20.8708	0.031098								TRUE	0.542962	TRUE	3	13	Amp		0.987072	N	N	N	N	N	N	91.2062
150	G6	FALSE	N7	ESR1	UNKNOWN	SYBR	None	20.8458	20.8708	0.031098								TRUE	0.542962	TRUE	3	14	Amp		0.991567	N	N	N	N	N	N	91.3185
151	G7	FALSE	N7	RYR2	UNKNOWN	SYBR	None	27.4742	27.6172	0.125111								TRUE	0.605221	TRUE	3	20	Amp		0.97361	N	N	N	N	N	N	84.9201
152	G8	FALSE	N7	RYR2	UNKNOWN	SYBR	None	27.7065	27.6172	0.125111								TRUE	0.605221	TRUE	3	22	Amp		0.988669	N	N	N	N	N	N	89.9714
153	G9	FALSE	N7	RYR2	UNKNOWN	SYBR	None	27.671	27.6172	0.125111								TRUE	0.605221	TRUE	3	20	Amp		0.990447	N	N	N	N	N	N	92.1765
154	G10	FALSE	N7	AQP11	UNKNOWN	SYBR	None	27.2561	27.3353	0.141983								TRUE	0.456844	TRUE	3	20	Amp		0.889847	N	N	N	N	N	N	80.1807
155	G11	FALSE	N7	AQP11	UNKNOWN	SYBR	None	27.2506	27.3353	0.141983								TRUE	0.456844	TRUE	3	20	Amp		0.889005	N	N	N	N	N	N	79.8443
156	G12	FALSE	N7	AQP11	UNKNOWN	SYBR	None	27.4992	27.3353	0.141983								TRUE	0.456844	TRUE	3	20	Amp		0.906981	N	N	N	N	N	N	80.1807
157	G13	FALSE	N7	APOA1	UNKNOWN	SYBR	None	26.8347	26.7259	0.0941577								TRUE	0.411991	TRUE	3	19	Amp		0.992039	N	N	N	N	N	N	82.691
158	G14	FALSE	N7	APOA1	UNKNOWN	SYBR	None	26.6716	26.7259	0.0941577								TRUE	0.411991	TRUE	3	20	Amp		0.98941	N	N	N	N	N	N	92.3511
159	G15	FALSE	N7	APOA1	UNKNOWN	SYBR	None	26.6716	26.7259	0.0941577								TRUE	0.411991	TRUE	3	19	Amp		0.989046	N	N	N	N	N	N	92.9127
160	G16	FALSE	N7	BOK	UNKNOWN	SYBR	None	20.5405	20.522	0.206668								TRUE	0.0999872	TRUE	3	17	Amp		0.995528	N	N	N	N	N	N	94.9346
161	G17	FALSE	N7	BOK	UNKNOWN	SYBR	None	20.3067	20.522	0.206668								TRUE	0.0999872	TRUE	3	17	Amp		0.994224	N	N	N	N	N	N	84.0468
162	G18	FALSE	N7	BOK	UNKNOWN	SYBR	None	20.7188	20.522	0.206668								TRUE	0.0999872	TRUE	3	16	Amp		0.98783	N	N	N	N	N	N	89.2155
163	G19	FALSE	N7	HO1	UNKNOWN	SYBR	None	22.7752	23.0155	0.227932								TRUE	0.59364	TRUE	3	15	Amp		0.987276	N	N	N	N	N	N	88.5414
164	G20	FALSE	N7	HO1	UNKNOWN	SYBR	None	23.0427	23.0155	0.227932								TRUE	0.59364	TRUE	3	14	Amp		0.982537	N	N	N	N	N	N	88.429
165	G21	FALSE	N7	HO1	UNKNOWN	SYBR	None	23.2286	23.0155	0.227932								TRUE	0.59364	TRUE	3	17	Amp		0.969522	N	N	N	N	N	N	88.6603
166	G22	FALSE	N7	RSAD2	UNKNOWN	SYBR	None	28.0162	28.008	0.0129664								TRUE	0.467927	TRUE	3	23	Amp		0.966762	N	N	N	N	N	N	83.3778
167	G23	FALSE	N7	RSAD2	UNKNOWN	SYBR	None	27.9931	28.008	0.0129664								TRUE	0.467927	TRUE	3	22	Amp		0.97502	N	N	N	N	N	N	83.3778
168	G24	FALSE	N7	RSAD2	UNKNOWN	SYBR	None	28.0148	28.008	0.0129664								TRUE	0.467927	TRUE	3	21	Amp		0.980135	N	N	N	N	N	N	83.3778
169	H1	FALSE	E1	ptgis	UNKNOWN	SYBR	None	26.7847	26.6213	0.152651								TRUE	0.52071	TRUE	3	19	Amp		0.984538	N	N	N	N	N	N	85.0705
170	H2	FALSE	E1	ptgis	UNKNOWN	SYBR	None	26.4824	26.6213	0.152651								TRUE	0.52071	TRUE	3	20	Amp		0.985754	N	N	N	N	N	N	85.0705
171	H3	FALSE	E1	ptgis	UNKNOWN	SYBR	None	26.5969	26.6213	0.152651								TRUE	0.52071	TRUE	3	20	Amp		0.977647	N	N	N	N	N	N	85.1829
172	H4	FALSE	E1	ESR1	UNKNOWN	SYBR	None	30.2576	29.9602	0.303201								TRUE	0.542962	TRUE	3	24	Amp		0.970845	N	N	N	N	N	N	91.1412
173	H5	FALSE	E1	ESR1	UNKNOWN	SYBR	None	29.6515	29.9602	0.303201								TRUE	0.542962	TRUE	3	21	Amp		0.962592	N	N	Y	N	N	N	91.0939	67.8579	75.7155
174	H6	FALSE	E1	ESR1	UNKNOWN	SYBR	None	29.9714	29.9602	0.303201								TRUE	0.542962	TRUE	3	23	Amp		0.987168	N	N	N	N	N	N	90.9817
175	H7	FALSE	E1	RYR2	UNKNOWN	SYBR	None	30.6987	30.4888	0.316257								TRUE	0.605221	TRUE	3	23	Amp		0.976504	N	N	N	N	N	N	84.9201
176	H8	FALSE	E1	RYR2	UNKNOWN	SYBR	None	30.6426	30.4888	0.316257								TRUE	0.605221	TRUE	3	24	Amp		0.969514	N	N	N	N	N	N	84.8079
177	H9	FALSE	E1	RYR2	UNKNOWN	SYBR	None	30.125	30.4888	0.316257								TRUE	0.605221	TRUE	3	24	Amp		0.986817	N	N	N	N	N	N	94.8672
178	H10	FALSE	E1	AQP11	UNKNOWN	SYBR	None	31.3893	31.2769	0.414527								TRUE	0.456844	TRUE	3	25	Amp		0.86753	N	N	N	N	N	N	79.9565
179	H11	FALSE	E1	AQP11	UNKNOWN	SYBR	None	31.6237	31.2769	0.414527								TRUE	0.456844	TRUE	3	25	Amp		0.859711	N	N	N	N	N	N	80.0686
180	H12	FALSE	E1	AQP11	UNKNOWN	SYBR	None	30.8178	31.2769	0.414527								TRUE	0.456844	TRUE	3	26	Amp		0.841822	N	N	N	N	N	N	80.0686
181	H13	FALSE	E1	APOA1	UNKNOWN	SYBR	None	31.391	32.1395	0.906201								TRUE	0.411991	TRUE	3	24	Amp		0.970225	N	Y	N	N	N	N	82.4664
182	H14	FALSE	E1	APOA1	UNKNOWN	SYBR	None	33.147	32.1395	0.906201								TRUE	0.411991	TRUE	3	27	Amp		0.982922	N	Y	N	N	N	N	82.4664
183	H15	FALSE	E1	APOA1	UNKNOWN	SYBR	None	31.8804	32.1395	0.906201								TRUE	0.411991	TRUE	3	25	Amp		0.986408	N	Y	N	N	N	N	82.354
184	H16	FALSE	E1	BOK	UNKNOWN	SYBR	None	26.2625	26.7284	0.502901								TRUE	0.0999872	TRUE	3	22	Amp		0.989581	N	Y	N	N	N	N	83.9266
185	H17	FALSE	E1	BOK	UNKNOWN	SYBR	None	26.6612	26.7284	0.502901								TRUE	0.0999872	TRUE	3	22	Amp		0.989704	N	Y	N	N	N	N	84.0468
186	H18	FALSE	E1	BOK	UNKNOWN	SYBR	None	27.2616	26.7284	0.502901								TRUE	0.0999872	TRUE	3	23	Amp		0.976349	N	Y	N	N	N	N	83.9345
187	H19	FALSE	E1	HO1	UNKNOWN	SYBR	None	24.0174	24.0499	0.0394207								TRUE	0.59364	TRUE	3	18	Amp		0.983459	N	N	N	N	N	N	88.6537
188	H20	FALSE	E1	HO1	UNKNOWN	SYBR	None	24.0385	24.0499	0.0394207								TRUE	0.59364	TRUE	3	18	Amp		0.976496	N	N	Y	N	N	N	88.429	83.0356
189	H21	FALSE	E1	HO1	UNKNOWN	SYBR	None	24.0937	24.0499	0.0394207								TRUE	0.59364	TRUE	3	19	Amp		0.95147	N	N	N	N	N	N	88.5479
190	H22	FALSE	E1	RSAD2	UNKNOWN	SYBR	None	29.0601	29.0901	0.159675								TRUE	0.467927	TRUE	3	22	Amp		0.967046	N	N	N	N	N	N	83.3778
191	H23	FALSE	E1	RSAD2	UNKNOWN	SYBR	None	28.9476	29.0901	0.159675								TRUE	0.467927	TRUE	3	22	Amp		0.976938	N	N	N	N	N	N	83.3778
192	H24	FALSE	E1	RSAD2	UNKNOWN	SYBR	None	29.2627	29.0901	0.159675								TRUE	0.467927	TRUE	3	22	Amp		0.985205	N	N	N	N	N	N	83.3778
193	I1	FALSE	E2	ptgis	UNKNOWN	SYBR	None	24.6692	24.7113	0.0414982								TRUE	0.52071	TRUE	3	17	Amp		0.985694	N	N	N	N	N	N	85.0705
194	I2	FALSE	E2	ptgis	UNKNOWN	SYBR	None	24.7521	24.7113	0.0414982								TRUE	0.52071	TRUE	3	18	Amp		0.989918	N	N	N	N	N	N	85.0705
195	I3	FALSE	E2	ptgis	UNKNOWN	SYBR	None	24.7126	24.7113	0.0414982								TRUE	0.52071	TRUE	3	18	Amp		0.97732	N	N	N	N	N	N	85.1829
196	I4	FALSE	E2	ESR1	UNKNOWN	SYBR	None	30.4799	30.6151	0.178738								TRUE	0.542962	TRUE	3	24	Amp		0.983889	N	N	N	N	N	N	91.1412
197	I5	FALSE	E2	ESR1	UNKNOWN	SYBR	None	30.8178	30.6151	0.178738								TRUE	0.542962	TRUE	3	24	Amp		0.989747	N	N	N	N	N	N	91.0939
198	I6	FALSE	E2	ESR1	UNKNOWN	SYBR	None	30.5477	30.6151	0.178738								TRUE	0.542962	TRUE	3	24	Amp		0.979729	N	N	N	N	N	N	91.0939
199	I7	FALSE	E2	RYR2	UNKNOWN	SYBR	None	28.9757	29.0597	0.178557								TRUE	0.605221	TRUE	3	23	Amp		0.98381	N	N	N	N	N	N	85.0324
200	I8	FALSE	E2	RYR2	UNKNOWN	SYBR	None	29.2647	29.0597	0.178557								TRUE	0.605221	TRUE	3	23	Amp		0.987644	N	N	N	N	N	N	85.0324
201	I9	FALSE	E2	RYR2	UNKNOWN	SYBR	None	28.9386	29.0597	0.178557								TRUE	0.605221	TRUE	3	22	Amp		0.986119	N	N	Y	N	N	N	84.8893	89.598
202	I10	FALSE	E2	AQP11	UNKNOWN	SYBR	None	29.4998	29.8632	0.331536								TRUE	0.456844	TRUE	3	24	Amp		0.863882	N	N	N	N	N	N	80.0686
203	I11	FALSE	E2	AQP11	UNKNOWN	SYBR	None	30.1492	29.8632	0.331536								TRUE	0.456844	TRUE	3	24	Amp		0.846592	N	N	N	N	N	N	80.0686
204	I12	FALSE	E2	AQP11	UNKNOWN	SYBR	None	29.9405	29.8632	0.331536								TRUE	0.456844	TRUE	3	23	Amp		0.868152	N	N	Y	N	N	N	80.0686	88.0284
205	I13	FALSE	E2	APOA1	UNKNOWN	SYBR	None	30.761	30.0115	0.683925								TRUE	0.411991	TRUE	3	25	Amp		0.982998	N	Y	Y	N	N	N	82.4664	88.532
206	I14	FALSE	E2	APOA1	UNKNOWN	SYBR	None	29.4212	30.0115	0.683925								TRUE	0.411991	TRUE	3	23	Amp		0.991413	N	Y	Y	N	N	N	82.4664	90.1046
207	I15	FALSE	E2	APOA1	UNKNOWN	SYBR	None	29.8523	30.0115	0.683925								TRUE	0.411991	TRUE	3	23	Amp		0.992032	N	Y	Y	N	N	N	82.4664	89.8799
208	I16	FALSE	E2	BOK	UNKNOWN	SYBR	None	27.2262	27.1738	0.313617								TRUE	0.0999872	TRUE	3	24	Amp		0.976307	N	N	N	N	N	N	83.8143
209	I17	FALSE	E2	BOK	UNKNOWN	SYBR	None	26.8373	27.1738	0.313617								TRUE	0.0999872	TRUE	3	24	Amp		0.992512	N	N	N	N	N	N	84.3839
210	I18	FALSE	E2	BOK	UNKNOWN	SYBR	None	27.4579	27.1738	0.313617								TRUE	0.0999872	TRUE	3	24	Amp		0.987289	N	N	N	N	N	N	94.9461
211	I19	FALSE	E2	HO1	UNKNOWN	SYBR	None	27.5461	27.6567	0.108009								TRUE	0.59364	TRUE	3	21	Amp		0.985576	N	N	N	N	N	N	88.5414
212	I20	FALSE	E2	HO1	UNKNOWN	SYBR	None	27.6622	27.6567	0.108009								TRUE	0.59364	TRUE	3	20	Amp		0.984215	N	N	N	N	N	N	88.429
213	I21	FALSE	E2	HO1	UNKNOWN	SYBR	None	27.7619	27.6567	0.108009								TRUE	0.59364	TRUE	3	22	Amp		0.984539	N	N	N	N	N	N	88.5479
214	I22	FALSE	E2	RSAD2	UNKNOWN	SYBR	None	34.3227	33.427	0.909112								TRUE	0.467927	TRUE	3	27	Amp		0.978004	N	Y	N	N	N	N	83.4902
215	I23	FALSE	E2	RSAD2	UNKNOWN	SYBR	None	33.4531	33.427	0.909112								TRUE	0.467927	TRUE	3	26	Amp		0.982381	N	Y	N	N	N	N	83.3778
216	I24	FALSE	E2	RSAD2	UNKNOWN	SYBR	None	32.5051	33.427	0.909112								TRUE	0.467927	TRUE	3	25	Amp		0.988489	N	Y	N	N	N	N	83.3778
217	J1	FALSE	E3	ptgis	UNKNOWN	SYBR	None	24.4238	24.399	0.0610289								TRUE	0.52071	TRUE	3	19	Amp		0.989154	N	N	N	N	N	N	85.0705
218	J2	FALSE	E3	ptgis	UNKNOWN	SYBR	None	24.4437	24.399	0.0610289								TRUE	0.52071	TRUE	3	19	Amp		0.987614	N	N	N	N	N	N	85.0705
219	J3	FALSE	E3	ptgis	UNKNOWN	SYBR	None	24.3295	24.399	0.0610289								TRUE	0.52071	TRUE	3	18	Amp		0.989815	N	N	N	N	N	N	85.1829
220	J4	FALSE	E3	ESR1	UNKNOWN	SYBR	None	30.2957	30.4651	0.14742								TRUE	0.542962	TRUE	3	25	Amp		0.813092	N	N	N	N	N	N	91.1412
221	J5	FALSE	E3	ESR1	UNKNOWN	SYBR	None	30.5354	30.4651	0.14742								TRUE	0.542962	TRUE	3	24	Amp		0.986638	N	N	N	N	N	N	91.0939
222	J6	FALSE	E3	ESR1	UNKNOWN	SYBR	None	30.5642	30.4651	0.14742								TRUE	0.542962	TRUE	3	24	Amp		0.984054	N	N	N	N	N	N	91.0939
223	J7	FALSE	E3	RYR2	UNKNOWN	SYBR	None	28.2256	28.2642	0.228411								TRUE	0.605221	TRUE	3	20	Amp		0.985395	N	N	N	N	N	N	84.9201
224	J8	FALSE	E3	RYR2	UNKNOWN	SYBR	None	28.5094	28.2642	0.228411								TRUE	0.605221	TRUE	3	21	Amp		0.985396	N	N	N	N	N	N	85.0324
225	J9	FALSE	E3	RYR2	UNKNOWN	SYBR	None	28.0575	28.2642	0.228411								TRUE	0.605221	TRUE	3	22	Amp		0.977462	N	N	N	N	N	N	84.8893
226	J10	FALSE	E3	AQP11	UNKNOWN	SYBR	None	29.5649	29.7302	0.295486								TRUE	0.456844	TRUE	3	24	Amp		0.885336	N	N	N	N	N	N	80.0686
227	J11	FALSE	E3	AQP11	UNKNOWN	SYBR	None	30.0713	29.7302	0.295486								TRUE	0.456844	TRUE	3	25	Amp		0.87673	N	N	N	N	N	Y	80.0686
228	J12	FALSE	E3	AQP11	UNKNOWN	SYBR	None	29.5543	29.7302	0.295486								TRUE	0.456844	TRUE	3	23	Amp		0.834956	N	N	N	N	N	N	80.0686
229	J13	FALSE	E3	APOA1	UNKNOWN	SYBR	None	30.0003	29.8299	0.323628								TRUE	0.411991	TRUE	3	24	Amp		0.911706	N	N	N	N	N	N	82.4664
230	J14	FALSE	E3	APOA1	UNKNOWN	SYBR	None	29.4567	29.8299	0.323628								TRUE	0.411991	TRUE	3	23	Amp		0.990415	N	N	N	N	N	N	82.4664
231	J15	FALSE	E3	APOA1	UNKNOWN	SYBR	None	30.0327	29.8299	0.323628								TRUE	0.411991	TRUE	3	24	Amp		0.960362	N	N	N	N	N	N	82.354
232	J16	FALSE	E3	BOK	UNKNOWN	SYBR	None	25.7986	25.5863	0.286064								TRUE	0.0999872	TRUE	3	22	Amp		0.984127	N	N	N	N	N	N	83.9266
233	J17	FALSE	E3	BOK	UNKNOWN	SYBR	None	25.6993	25.5863	0.286064								TRUE	0.0999872	TRUE	3	22	Amp		0.992884	N	N	N	N	N	N	84.2715
234	J18	FALSE	E3	BOK	UNKNOWN	SYBR	None	25.261	25.5863	0.286064								TRUE	0.0999872	TRUE	3	22	Amp		0.992927	N	N	N	N	N	N	84.0468
235	J19	FALSE	E3	HO1	UNKNOWN	SYBR	None	27.2405	27.3279	0.075702								TRUE	0.59364	TRUE	3	20	Amp		0.988619	N	N	N	N	N	N	88.6537
236	J20	FALSE	E3	HO1	UNKNOWN	SYBR	None	27.3732	27.3279	0.075702								TRUE	0.59364	TRUE	3	22	Amp		0.98039	N	N	Y	N	N	N	88.429	79.2152
237	J21	FALSE	E3	HO1	UNKNOWN	SYBR	None	27.37	27.3279	0.075702								TRUE	0.59364	TRUE	3	21	Amp		0.96863	N	N	N	N	N	N	88.5479
238	J22	FALSE	E3	RSAD2	UNKNOWN	SYBR	None	31.0875	31.3434	0.509492								TRUE	0.467927	TRUE	3	26	Amp		0.979357	N	Y	N	N	N	N	83.3778
239	J23	FALSE	E3	RSAD2	UNKNOWN	SYBR	None	31.0127	31.3434	0.509492								TRUE	0.467927	TRUE	3	24	Amp		0.97704	N	Y	N	N	N	N	83.3778
240	J24	FALSE	E3	RSAD2	UNKNOWN	SYBR	None	31.9301	31.3434	0.509492								TRUE	0.467927	TRUE	3	26	Amp		0.980512	N	Y	N	N	N	N	83.3778
241	K1	FALSE	E4	ptgis	UNKNOWN	SYBR	None	23.1134	23.1506	0.0614744								TRUE	0.52071	TRUE	3	17	Amp		0.983664	N	N	N	N	N	N	85.0705
242	K2	FALSE	E4	ptgis	UNKNOWN	SYBR	None	23.1168	23.1506	0.0614744								TRUE	0.52071	TRUE	3	17	Amp		0.986797	N	N	N	N	N	N	85.1829
243	K3	FALSE	E4	ptgis	UNKNOWN	SYBR	None	23.2216	23.1506	0.0614744								TRUE	0.52071	TRUE	3	17	Amp		0.86798	N	N	N	N	N	N	85.1829
244	K4	FALSE	E4	ESR1	UNKNOWN	SYBR	None	29.3281	29.1766	0.209311								TRUE	0.542962	TRUE	3	23	Amp		0.976841	N	N	N	N	N	N	91.2536
245	K5	FALSE	E4	ESR1	UNKNOWN	SYBR	None	28.9378	29.1766	0.209311								TRUE	0.542962	TRUE	3	22	Amp		0.950242	N	N	N	N	N	N	91.0939
246	K6	FALSE	E4	ESR1	UNKNOWN	SYBR	None	29.2639	29.1766	0.209311								TRUE	0.542962	TRUE	3	24	Amp		0.894783	N	N	N	N	N	N	91.2062
247	K7	FALSE	E4	RYR2	UNKNOWN	SYBR	None	27.313	27.2911	0.0191667								TRUE	0.605221	TRUE	3	20	Amp		0.985873	N	N	Y	N	N	N	84.9201	89.8592
248	K8	FALSE	E4	RYR2	UNKNOWN	SYBR	None	27.2825	27.2911	0.0191667								TRUE	0.605221	TRUE	3	20	Amp		0.983537	N	N	N	N	N	N	84.9201
249	K9	FALSE	E4	RYR2	UNKNOWN	SYBR	None	27.2777	27.2911	0.0191667								TRUE	0.605221	TRUE	3	20	Amp		0.982386	N	N	N	N	N	N	84.8893
250	K10	FALSE	E4	AQP11	UNKNOWN	SYBR	None	28.1335	28.2742	0.144671								TRUE	0.456844	TRUE	3	21	Amp		0.897193	N	N	N	N	N	N	80.0686
251	K11	FALSE	E4	AQP11	UNKNOWN	SYBR	None	28.2666	28.2742	0.144671								TRUE	0.456844	TRUE	3	22	Amp		0.870189	N	N	N	N	N	N	80.1807
252	K12	FALSE	E4	AQP11	UNKNOWN	SYBR	None	28.4225	28.2742	0.144671								TRUE	0.456844	TRUE	3	22	Amp		0.869653	N	N	N	N	N	N	80.1807
253	K13	FALSE	E4	APOA1	UNKNOWN	SYBR	None	27.2537	27.22	0.233195								TRUE	0.411991	TRUE	3	20	Amp		0.983279	N	N	N	N	N	N	82.691
254	K14	FALSE	E4	APOA1	UNKNOWN	SYBR	None	26.9718	27.22	0.233195								TRUE	0.411991	TRUE	3	21	Amp		0.994715	N	N	N	N	N	N	82.5787
255	K15	FALSE	E4	APOA1	UNKNOWN	SYBR	None	27.4345	27.22	0.233195								TRUE	0.411991	TRUE	3	21	Amp		0.980688	N	N	N	N	N	N	82.2417
256	K16	FALSE	E4	BOK	UNKNOWN	SYBR	None	26.3498	26.2372	0.468237								TRUE	0.0999872	TRUE	3	22	Amp		0.928515	N	N	N	N	N	N	83.9266
257	K17	FALSE	E4	BOK	UNKNOWN	SYBR	None	26.6389	26.2372	0.468237								TRUE	0.0999872	TRUE	3	22	Amp		0.973533	N	N	N	N	N	N	83.9345
258	K18	FALSE	E4	BOK	UNKNOWN	SYBR	None	25.7229	26.2372	0.468237								TRUE	0.0999872	TRUE	3	20	Amp		0.995471	N	N	N	N	N	N	84.1592
259	K19	FALSE	E4	HO1	UNKNOWN	SYBR	None	25.574	25.5019	0.146019								TRUE	0.59364	TRUE	3	19	Amp		0.982508	N	N	N	N	N	N	88.6537
260	K20	FALSE	E4	HO1	UNKNOWN	SYBR	None	25.3339	25.5019	0.146019								TRUE	0.59364	TRUE	3	18	Amp		0.986109	N	N	N	N	N	N	88.429
261	K21	FALSE	E4	HO1	UNKNOWN	SYBR	None	25.5979	25.5019	0.146019								TRUE	0.59364	TRUE	3	18	Amp		0.975854	N	N	N	N	N	N	88.5479
262	K22	FALSE	E4	RSAD2	UNKNOWN	SYBR	None	31.7347	31.6388	0.273712								TRUE	0.467927	TRUE	3	25	Amp		0.973516	N	N	N	N	N	N	83.3778
263	K23	FALSE	E4	RSAD2	UNKNOWN	SYBR	None	31.3301	31.6388	0.273712								TRUE	0.467927	TRUE	3	25	Amp		0.985989	N	N	N	N	N	N	83.3778
264	K24	FALSE	E4	RSAD2	UNKNOWN	SYBR	None	31.8517	31.6388	0.273712								TRUE	0.467927	TRUE	3	25	Amp		0.884663	N	N	N	N	N	N	83.3778
265	L1	FALSE	E5	ptgis	UNKNOWN	SYBR	None	25.7814	25.797	0.0159375								TRUE	0.52071	TRUE	3	18	Amp		0.989188	N	N	N	N	N	N	85.0705
266	L2	FALSE	E5	ptgis	UNKNOWN	SYBR	None	25.8133	25.797	0.0159375								TRUE	0.52071	TRUE	3	19	Amp		0.986258	N	N	N	N	N	N	85.0705
267	L3	FALSE	E5	ptgis	UNKNOWN	SYBR	None	25.7964	25.797	0.0159375								TRUE	0.52071	TRUE	3	20	Amp		0.987866	N	N	N	N	N	N	85.1829
268	L4	FALSE	E5	ESR1	UNKNOWN	SYBR	None	30.5653	30.8191	0.282136								TRUE	0.542962	TRUE	3	24	Amp		0.98523	N	N	N	N	N	N	91.1412
269	L5	FALSE	E5	ESR1	UNKNOWN	SYBR	None	30.7691	30.8191	0.282136								TRUE	0.542962	TRUE	3	24	Amp		0.961863	N	N	N	N	N	N	91.0939
270	L6	FALSE	E5	ESR1	UNKNOWN	SYBR	None	31.1229	30.8191	0.282136								TRUE	0.542962	TRUE	3	24	Amp		0.96286	N	N	N	N	N	N	91.0939
271	L7	FALSE	E5	RYR2	UNKNOWN	SYBR	None	28.8813	28.9932	0.269198								TRUE	0.605221	TRUE	3	21	Amp		0.986749	N	N	Y	N	N	N	84.8079	89.8592
272	L8	FALSE	E5	RYR2	UNKNOWN	SYBR	None	28.798	28.9932	0.269198								TRUE	0.605221	TRUE	3	23	Amp		0.98262	N	N	N	N	N	N	84.9201
273	L9	FALSE	E5	RYR2	UNKNOWN	SYBR	None	29.3003	28.9932	0.269198								TRUE	0.605221	TRUE	3	23	Amp		0.98185	N	N	N	N	N	N	84.8893
274	L10	FALSE	E5	AQP11	UNKNOWN	SYBR	None	31.0412	30.758	0.255								TRUE	0.456844	TRUE	3	25	Amp		0.84577	N	N	N	N	N	N	80.0686
275	L11	FALSE	E5	AQP11	UNKNOWN	SYBR	None	30.686	30.758	0.255								TRUE	0.456844	TRUE	3	25	Amp		0.873674	N	N	N	N	N	N	80.0686
276	L12	FALSE	E5	AQP11	UNKNOWN	SYBR	None	30.5467	30.758	0.255								TRUE	0.456844	TRUE	3	25	Amp		0.845545	N	N	N	N	N	N	80.0686
277	L13	FALSE	E5	APOA1	UNKNOWN	SYBR	None	30.793	31.3496	0.944691								TRUE	0.411991	TRUE	3	25	Amp		0.991492	N	Y	N	N	N	N	82.5787
278	L14	FALSE	E5	APOA1	UNKNOWN	SYBR	None	30.8155	31.3496	0.944691								TRUE	0.411991	TRUE	3	25	Amp		0.9096	N	Y	N	N	N	N	82.4664
279	L15	FALSE	E5	APOA1	UNKNOWN	SYBR	None	32.4404	31.3496	0.944691								TRUE	0.411991	TRUE	3	26	Amp		0.917985	N	Y	N	N	N	Y	82.354
280	L16	FALSE	E5	BOK	UNKNOWN	SYBR	None	25.2705	25.3393	0.467814								TRUE	0.0999872	TRUE	3	21	Amp		0.98173	N	N	N	N	N	N	83.702
281	L17	FALSE	E5	BOK	UNKNOWN	SYBR	None	24.9097	25.3393	0.467814								TRUE	0.0999872	TRUE	3	21	Amp		0.99536	N	N	N	N	N	N	83.7097
282	L18	FALSE	E5	BOK	UNKNOWN	SYBR	None	25.8377	25.3393	0.467814								TRUE	0.0999872	TRUE	3	23	Amp		0.9226	N	N	N	N	N	N	84.2715
283	L19	FALSE	E5	HO1	UNKNOWN	SYBR	None	29.3549	29.6476	0.265349								TRUE	0.59364	TRUE	3	23	Amp		0.944667	N	N	N	N	N	N	88.429
284	L20	FALSE	E5	HO1	UNKNOWN	SYBR	None	29.8724	29.6476	0.265349								TRUE	0.59364	TRUE	3	24	Amp		0.963605	N	N	N	N	N	N	88.429
285	L21	FALSE	E5	HO1	UNKNOWN	SYBR	None	29.7155	29.6476	0.265349								TRUE	0.59364	TRUE	3	23	Amp		0.97574	N	N	N	N	N	N	88.5479
286	L22	FALSE	E5	RSAD2	UNKNOWN	SYBR	None	33.0299	32.2234	1.01452								TRUE	0.467927	TRUE	3	27	Amp		0.985299	N	Y	N	N	N	N	83.3778
287	L23	FALSE	E5	RSAD2	UNKNOWN	SYBR	None	31.0843	32.2234	1.01452								TRUE	0.467927	TRUE	3	25	Amp		0.976219	N	Y	N	N	N	N	83.3778
288	L24	FALSE	E5	RSAD2	UNKNOWN	SYBR	None	32.556	32.2234	1.01452								TRUE	0.467927	TRUE	3	26	Amp		0.966796	N	Y	N	N	N	N	83.3778
289	M1	FALSE	E6	ptgis	UNKNOWN	SYBR	None	21.1795	21.081	0.0870968								TRUE	0.52071	TRUE	3	14	Amp		0.982306	N	N	N	N	N	N	85.0705
290	M2	FALSE	E6	ptgis	UNKNOWN	SYBR	None	21.0491	21.081	0.0870968								TRUE	0.52071	TRUE	3	14	Amp		0.97072	N	N	N	N	N	N	85.0705
291	M3	FALSE	E6	ptgis	UNKNOWN	SYBR	None	21.0143	21.081	0.0870968								TRUE	0.52071	TRUE	3	15	Amp		0.981105	N	N	N	N	N	N	85.1829
292	M4	FALSE	E6	ESR1	UNKNOWN	SYBR	None	25.1001	25.1191	0.0189735								TRUE	0.542962	TRUE	3	19	Amp		0.971495	N	N	N	N	N	N	91.2536
293	M5	FALSE	E6	ESR1	UNKNOWN	SYBR	None	25.119	25.1191	0.0189735								TRUE	0.542962	TRUE	3	18	Amp		0.96424	N	N	N	N	N	N	91.0939
294	M6	FALSE	E6	ESR1	UNKNOWN	SYBR	None	25.1381	25.1191	0.0189735								TRUE	0.542962	TRUE	3	19	Amp		0.945552	N	N	N	N	N	N	91.0939
295	M7	FALSE	E6	RYR2	UNKNOWN	SYBR	None	25.7683	25.7464	0.100152								TRUE	0.605221	TRUE	3	19	Amp		0.980354	N	N	N	N	N	N	84.8079
296	M8	FALSE	E6	RYR2	UNKNOWN	SYBR	None	25.6371	25.7464	0.100152								TRUE	0.605221	TRUE	3	18	Amp		0.985319	N	N	N	N	N	N	85.0324
297	M9	FALSE	E6	RYR2	UNKNOWN	SYBR	None	25.8338	25.7464	0.100152								TRUE	0.605221	TRUE	3	19	Amp		0.947327	N	N	N	N	N	N	84.7772
298	M10	FALSE	E6	AQP11	UNKNOWN	SYBR	None	24.9892	24.9889	0.0625672								TRUE	0.456844	TRUE	3	19	Amp		0.949728	N	N	N	N	N	N	80.0686
299	M11	FALSE	E6	AQP11	UNKNOWN	SYBR	None	24.9262	24.9889	0.0625672								TRUE	0.456844	TRUE	3	19	Amp		0.923979	N	N	N	N	N	N	79.9565
300	M12	FALSE	E6	AQP11	UNKNOWN	SYBR	None	25.0514	24.9889	0.0625672								TRUE	0.456844	TRUE	3	19	Amp		0.926696	N	N	N	N	N	N	79.9565
301	M13	FALSE	E6	APOA1	UNKNOWN	SYBR	None	23.6362	23.645	0.0465063								TRUE	0.411991	TRUE	3	18	Amp		0.97646	N	N	N	N	N	N	82.8034
302	M14	FALSE	E6	APOA1	UNKNOWN	SYBR	None	23.6036	23.645	0.0465063								TRUE	0.411991	TRUE	3	18	Amp		0.955142	N	N	N	N	N	N	82.5787
303	M15	FALSE	E6	APOA1	UNKNOWN	SYBR	None	23.6953	23.645	0.0465063								TRUE	0.411991	TRUE	3	18	Amp		0.985212	N	N	N	N	N	N	82.691
304	M16	FALSE	E6	BOK	UNKNOWN	SYBR	None	22.7139	22.713	0.00811585								TRUE	0.0999872	TRUE	3	18	Amp		0.988049	N	N	N	N	N	N	83.4773
305	M17	FALSE	E6	BOK	UNKNOWN	SYBR	None	22.7045	22.713	0.00811585								TRUE	0.0999872	TRUE	3	18	Amp		0.990137	N	N	N	N	N	N	84.1592
306	M18	FALSE	E6	BOK	UNKNOWN	SYBR	None	22.7207	22.713	0.00811585								TRUE	0.0999872	TRUE	3	18	Amp		0.990623	N	N	N	N	N	N	84.2715
307	M19	FALSE	E6	HO1	UNKNOWN	SYBR	None	24.4469	24.4881	0.0358551								TRUE	0.59364	TRUE	3	17	Amp		0.97981	N	N	N	N	N	N	88.429
308	M20	FALSE	E6	HO1	UNKNOWN	SYBR	None	24.5129	24.4881	0.0358551								TRUE	0.59364	TRUE	3	17	Amp		0.957692	N	N	N	N	N	N	88.429
309	M21	FALSE	E6	HO1	UNKNOWN	SYBR	None	24.5043	24.4881	0.0358551								TRUE	0.59364	TRUE	3	18	Amp		0.978406	N	N	N	N	N	N	88.5479
310	M22	FALSE	E6	RSAD2	UNKNOWN	SYBR	None	27.7235	27.8797	0.163241								TRUE	0.467927	TRUE	3	21	Amp		0.974835	N	N	N	N	N	N	83.3778
311	M23	FALSE	E6	RSAD2	UNKNOWN	SYBR	None	27.8665	27.8797	0.163241								TRUE	0.467927	TRUE	3	23	Amp		0.9751	N	N	N	N	N	N	83.3778
312	M24	FALSE	E6	RSAD2	UNKNOWN	SYBR	None	28.0491	27.8797	0.163241								TRUE	0.467927	TRUE	3	21	Amp		0.980816	N	N	N	N	N	N	83.3778
313	N1	FALSE	E7	ptgis	UNKNOWN	SYBR	None	25.9678	26.0082	0.122469								TRUE	0.52071	TRUE	3	19	Amp		0.989582	N	N	N	N	N	N	85.0705
314	N2	FALSE	E7	ptgis	UNKNOWN	SYBR	None	26.1458	26.0082	0.122469								TRUE	0.52071	TRUE	3	19	Amp		0.985301	N	N	N	N	N	N	85.0705
315	N3	FALSE	E7	ptgis	UNKNOWN	SYBR	None	25.9111	26.0082	0.122469								TRUE	0.52071	TRUE	3	19	Amp		0.971738	N	N	N	N	N	N	85.1829
316	N4	FALSE	E7	ESR1	UNKNOWN	SYBR	None	29.4906	29.5753	0.247065								TRUE	0.542962	TRUE	3	22	Amp		0.982762	N	N	N	N	N	N	91.1412
317	N5	FALSE	E7	ESR1	UNKNOWN	SYBR	None	29.3817	29.5753	0.247065								TRUE	0.542962	TRUE	3	21	Amp		0.974655	N	N	N	N	N	N	91.0939
318	N6	FALSE	E7	ESR1	UNKNOWN	SYBR	None	29.8535	29.5753	0.247065								TRUE	0.542962	TRUE	3	23	Amp		0.98722	N	N	N	N	N	N	91.0939
319	N7	FALSE	E7	RYR2	UNKNOWN	SYBR	None	27.9655	28.0759	0.096908								TRUE	0.605221	TRUE	3	22	Amp		0.977057	N	N	N	N	N	N	84.8079
320	N8	FALSE	E7	RYR2	UNKNOWN	SYBR	None	28.1152	28.0759	0.096908								TRUE	0.605221	TRUE	3	22	Amp		0.968152	N	N	N	N	N	N	84.9201
321	N9	FALSE	E7	RYR2	UNKNOWN	SYBR	None	28.1469	28.0759	0.096908								TRUE	0.605221	TRUE	3	22	Amp		0.914792	N	N	N	N	N	N	84.7772
322	N10	FALSE	E7	AQP11	UNKNOWN	SYBR	None	29.3821	29.3124	0.060447								TRUE	0.456844	TRUE	3	23	Amp		0.830362	N	N	N	N	N	N	80.0686
323	N11	FALSE	E7	AQP11	UNKNOWN	SYBR	None	29.2741	29.3124	0.060447								TRUE	0.456844	TRUE	3	23	Amp		0.872246	N	N	N	N	N	N	80.0686
324	N12	FALSE	E7	AQP11	UNKNOWN	SYBR	None	29.2811	29.3124	0.060447								TRUE	0.456844	TRUE	3	22	Amp		0.849735	N	N	N	N	N	N	80.0686
325	N13	FALSE	E7	APOA1	UNKNOWN	SYBR	None	27.0871	27.1609	0.110975								TRUE	0.411991	TRUE	3	22	Amp		0.988052	N	N	Y	N	N	N	82.2417	87.5211
326	N14	FALSE	E7	APOA1	UNKNOWN	SYBR	None	27.2885	27.1609	0.110975								TRUE	0.411991	TRUE	3	22	Amp		0.79996	Y	N	N	N	N	N	82.4664
327	N15	FALSE	E7	APOA1	UNKNOWN	SYBR	None	27.1071	27.1609	0.110975								TRUE	0.411991	TRUE	3	21	Amp		0.992894	N	N	N	N	N	N	82.4664
328	N16	FALSE	E7	BOK	UNKNOWN	SYBR	None	26.107	27.3717	1.8045								TRUE	0.0999872	TRUE	3	22	Amp		0.996668	N	Y	N	N	N	N	83.4773
329	N17	FALSE	E7	BOK	UNKNOWN	SYBR	None	29.4382	27.3717	1.8045								TRUE	0.0999872	TRUE	3	26	Amp		0.514857	Y	Y	N	N	N	N	83.8221
330	N18	FALSE	E7	BOK	UNKNOWN	SYBR	None	26.5701	27.3717	1.8045								TRUE	0.0999872	TRUE	3	22	Amp		0.995171	N	Y	Y	N	N	N	83.2603	91.4628
331	N19	FALSE	E7	HO1	UNKNOWN	SYBR	None	28.2005	28.3094	0.136943								TRUE	0.59364	TRUE	3	22	Amp		0.971857	N	N	N	N	N	N	88.429
332	N20	FALSE	E7	HO1	UNKNOWN	SYBR	None	28.4631	28.3094	0.136943								TRUE	0.59364	TRUE	3	22	Amp		0.912486	N	N	N	N	N	N	88.429
333	N21	FALSE	E7	HO1	UNKNOWN	SYBR	None	28.2645	28.3094	0.136943								TRUE	0.59364	TRUE	3	21	Amp		0.983709	N	N	N	N	N	N	88.5479
334	N22	FALSE	E7	RSAD2	UNKNOWN	SYBR	None	30.8059	31.3236	0.864173								TRUE	0.467927	TRUE	3	25	Amp		0.973011	N	Y	N	N	N	N	83.2654
335	N23	FALSE	E7	RSAD2	UNKNOWN	SYBR	None	30.8438	31.3236	0.864173								TRUE	0.467927	TRUE	3	24	Amp		0.980521	N	Y	N	N	N	N	83.3778
336	N24	FALSE	E7	RSAD2	UNKNOWN	SYBR	None	32.3213	31.3236	0.864173								TRUE	0.467927	TRUE	3	24	Amp		0.984659	N	Y	N	N	N	Y	83.3778
337	O1	FALSE	N1	actin	UNKNOWN	SYBR	None	15.8707	16.0734	0.697052								TRUE	0.494327	TRUE	3	10	Amp		0.985511	N	Y	N	N	N	N	82.4848
338	O2	FALSE	N1	actin	UNKNOWN	SYBR	None	16.8493	16.0734	0.697052								TRUE	0.494327	TRUE	3	11	Amp		0.91134	N	Y	N	N	Y	N	82.4848
339	O3	FALSE	N1	actin	UNKNOWN	SYBR	None	15.5001	16.0734	0.697052								TRUE	0.494327	TRUE	3	9	Amp		0.980136	N	Y	N	N	N	N	82.4848
340	O4	FALSE	N2	actin	UNKNOWN	SYBR	None	16.1351	16.1702	0.0321716								TRUE	0.494327	TRUE	3	10	Amp		0.975202	N	N	N	N	N	N	82.4848
341	O5	FALSE	N2	actin	UNKNOWN	SYBR	None	16.1771	16.1702	0.0321716								TRUE	0.494327	TRUE	3	9	Amp		0.968866	N	N	N	N	N	N	82.4506
342	O6	FALSE	N2	actin	UNKNOWN	SYBR	None	16.1983	16.1702	0.0321716								TRUE	0.494327	TRUE	3	10	Amp		0.982907	N	N	N	N	N	N	82.4506
343	O7	FALSE	N3	actin	UNKNOWN	SYBR	None	20.2216	20.2907	0.0650431								TRUE	0.494327	TRUE	3	14	Amp		0.972604	N	N	N	N	N	N	82.4506
344	O8	FALSE	N3	actin	UNKNOWN	SYBR	None	20.2998	20.2907	0.0650431								TRUE	0.494327	TRUE	3	13	Amp		0.973789	N	N	N	N	N	N	82.5628
345	O9	FALSE	N3	actin	UNKNOWN	SYBR	None	20.3507	20.2907	0.0650431								TRUE	0.494327	TRUE	3	15	Amp		0.975503	N	N	N	N	N	N	82.4229
346	O10	FALSE	N4	actin	UNKNOWN	SYBR	None	15.4833	15.4154	0.0620996								TRUE	0.494327	TRUE	3	9	Amp		0.987676	N	N	N	N	N	N	82.535
347	O11	FALSE	N4	actin	UNKNOWN	SYBR	None	15.4013	15.4154	0.0620996								TRUE	0.494327	TRUE	3	9	Amp		0.979586	N	N	N	N	N	N	82.535
348	O12	FALSE	N4	actin	UNKNOWN	SYBR	None	15.3615	15.4154	0.0620996								TRUE	0.494327	TRUE	3	9	Amp		0.98681	N	N	N	N	N	N	82.535
349	O13	FALSE	N5	actin	UNKNOWN	SYBR	None	15.7488	15.7798	0.0795317								TRUE	0.494327	TRUE	3	9	Amp		0.985473	N	N	N	N	N	N	82.4664
350	O14	FALSE	N5	actin	UNKNOWN	SYBR	None	15.8702	15.7798	0.0795317								TRUE	0.494327	TRUE	3	10	Amp		0.991846	N	N	N	N	N	N	82.4664
351	O15	FALSE	N5	actin	UNKNOWN	SYBR	None	15.7205	15.7798	0.0795317								TRUE	0.494327	TRUE	3	10	Amp		0.98643	N	N	N	N	N	N	82.4664
352	O16	FALSE	N6	actin	UNKNOWN	SYBR	None	17.6875	18.0704	0.343843								TRUE	0.494327	TRUE	3	12	Amp		0.993162	N	N	Y	N	N	N	82.2417	85.4992
353	O17	FALSE	N6	actin	UNKNOWN	SYBR	None	18.1708	18.0704	0.343843								TRUE	0.494327	TRUE	3	12	Amp		0.960119	N	N	Y	N	N	N	82.249	85.5076
354	O18	FALSE	N6	actin	UNKNOWN	SYBR	None	18.3528	18.0704	0.343843								TRUE	0.494327	TRUE	3	13	Amp		0.978436	N	N	Y	N	N	N	82.3614	85.5076
355	O19	FALSE	N7	actin	UNKNOWN	SYBR	None	16.0965	16.1501	0.207156								TRUE	0.494327	TRUE	3	10	Amp		0.977814	N	N	N	N	N	N	82.3614
356	O20	FALSE	N7	actin	UNKNOWN	SYBR	None	16.3788	16.1501	0.207156								TRUE	0.494327	TRUE	3	11	Amp		0.970646	N	N	N	Y	N	N	82.1366
357	O21	FALSE	N7	actin	UNKNOWN	SYBR	None	15.9751	16.1501	0.207156								TRUE	0.494327	TRUE	3	10	Amp		0.989007	N	N	N	N	N	N	82.4787
361	P1	FALSE	E1	actin	UNKNOWN	SYBR	None	18.6042	18.5706	0.0414385								TRUE	0.494327	TRUE	3	14	Amp		0.98961	N	N	N	N	N	N	82.4848
362	P2	FALSE	E1	actin	UNKNOWN	SYBR	None	18.5834	18.5706	0.0414385								TRUE	0.494327	TRUE	3	13	Amp		0.98022	N	N	N	N	N	N	82.4848
363	P3	FALSE	E1	actin	UNKNOWN	SYBR	None	18.5243	18.5706	0.0414385								TRUE	0.494327	TRUE	3	12	Amp		0.982035	N	N	N	N	N	N	82.4848
364	P4	FALSE	E2	actin	UNKNOWN	SYBR	None	20.9621	20.826	0.269053								TRUE	0.494327	TRUE	3	14	Amp		0.985381	N	N	N	N	N	N	82.4848
365	P5	FALSE	E2	actin	UNKNOWN	SYBR	None	20.9998	20.826	0.269053								TRUE	0.494327	TRUE	3	16	Amp		0.989552	N	N	N	N	N	N	82.4506
366	P6	FALSE	E2	actin	UNKNOWN	SYBR	None	20.5161	20.826	0.269053								TRUE	0.494327	TRUE	3	12	Amp		0.966101	N	N	N	N	N	N	82.5628
367	P7	FALSE	E3	actin	UNKNOWN	SYBR	None	19.7789	19.7103	0.0792623								TRUE	0.494327	TRUE	3	14	Amp		0.988776	N	N	N	N	N	N	82.4506
368	P8	FALSE	E3	actin	UNKNOWN	SYBR	None	19.7285	19.7103	0.0792623								TRUE	0.494327	TRUE	3	13	Amp		0.988421	N	N	Y	N	N	N	82.4506	85.8181
369	P9	FALSE	E3	actin	UNKNOWN	SYBR	None	19.6235	19.7103	0.0792623								TRUE	0.494327	TRUE	3	11	Amp		0.985326	N	N	N	N	N	N	82.4229
370	P10	FALSE	E4	actin	UNKNOWN	SYBR	None	19.3949	19.5616	0.154525								TRUE	0.494327	TRUE	3	12	Amp		0.984541	N	N	N	N	N	N	82.4229
371	P11	FALSE	E4	actin	UNKNOWN	SYBR	None	19.5897	19.5616	0.154525								TRUE	0.494327	TRUE	3	13	Amp		0.982704	N	N	N	N	N	N	82.4229
372	P12	FALSE	E4	actin	UNKNOWN	SYBR	None	19.7001	19.5616	0.154525								TRUE	0.494327	TRUE	3	12	Amp		0.992081	N	N	N	N	N	N	82.4229
373	P13	FALSE	E5	actin	UNKNOWN	SYBR	None	20.2146	20.2216	0.00688938								TRUE	0.494327	TRUE	3	15	Amp		0.985897	N	N	N	N	N	N	82.4664
374	P14	FALSE	E5	actin	UNKNOWN	SYBR	None	20.222	20.2216	0.00688938								TRUE	0.494327	TRUE	3	14	Amp		0.988182	N	N	N	N	N	N	82.4664
375	P15	FALSE	E5	actin	UNKNOWN	SYBR	None	20.2283	20.2216	0.00688938								TRUE	0.494327	TRUE	3	14	Amp		0.98685	N	N	N	N	N	N	82.354
376	P16	FALSE	E6	actin	UNKNOWN	SYBR	None	16.7329	16.8824	0.129452								TRUE	0.494327	TRUE	3	9	Amp		0.989739	N	N	Y	N	N	N	82.354	87.4087
377	P17	FALSE	E6	actin	UNKNOWN	SYBR	None	16.9553	16.8824	0.129452								TRUE	0.494327	TRUE	3	11	Amp		0.990213	N	N	N	N	N	N	82.3614
378	P18	FALSE	E6	actin	UNKNOWN	SYBR	None	16.9589	16.8824	0.129452								TRUE	0.494327	TRUE	3	11	Amp		0.987018	N	N	N	N	N	N	82.249
379	P19	FALSE	E7	actin	UNKNOWN	SYBR	None	21.5978	21.7718	0.150958								TRUE	0.494327	TRUE	3	16	Amp		0.981855	N	N	N	N	N	N	82.249
380	P20	FALSE	E7	actin	UNKNOWN	SYBR	None	21.8688	21.7718	0.150958								TRUE	0.494327	TRUE	3	16	Amp		0.986598	N	N	N	N	N	N	82.4737
381	P21	FALSE	E7	actin	UNKNOWN	SYBR	None	21.8487	21.7718	0.150958								TRUE	0.494327	TRUE	3	15	Amp		0.98455	N	N	N	N	N	N	82.7034
